# Supplementary material for: Fine-scale genomic analyses of admixed individuals reveal unrecognized genetic ancestry components in Argentina
Source: PubMed Central journal article supplement (PMC7365470; doi:10.1371/journal.pone.0233808), 2020-07-16
Supplement: pone.0233808.s002.pdf [file pone.0233808.s002.pdf]

# A. Cross-Validation Score Worldwide Meta Dataset

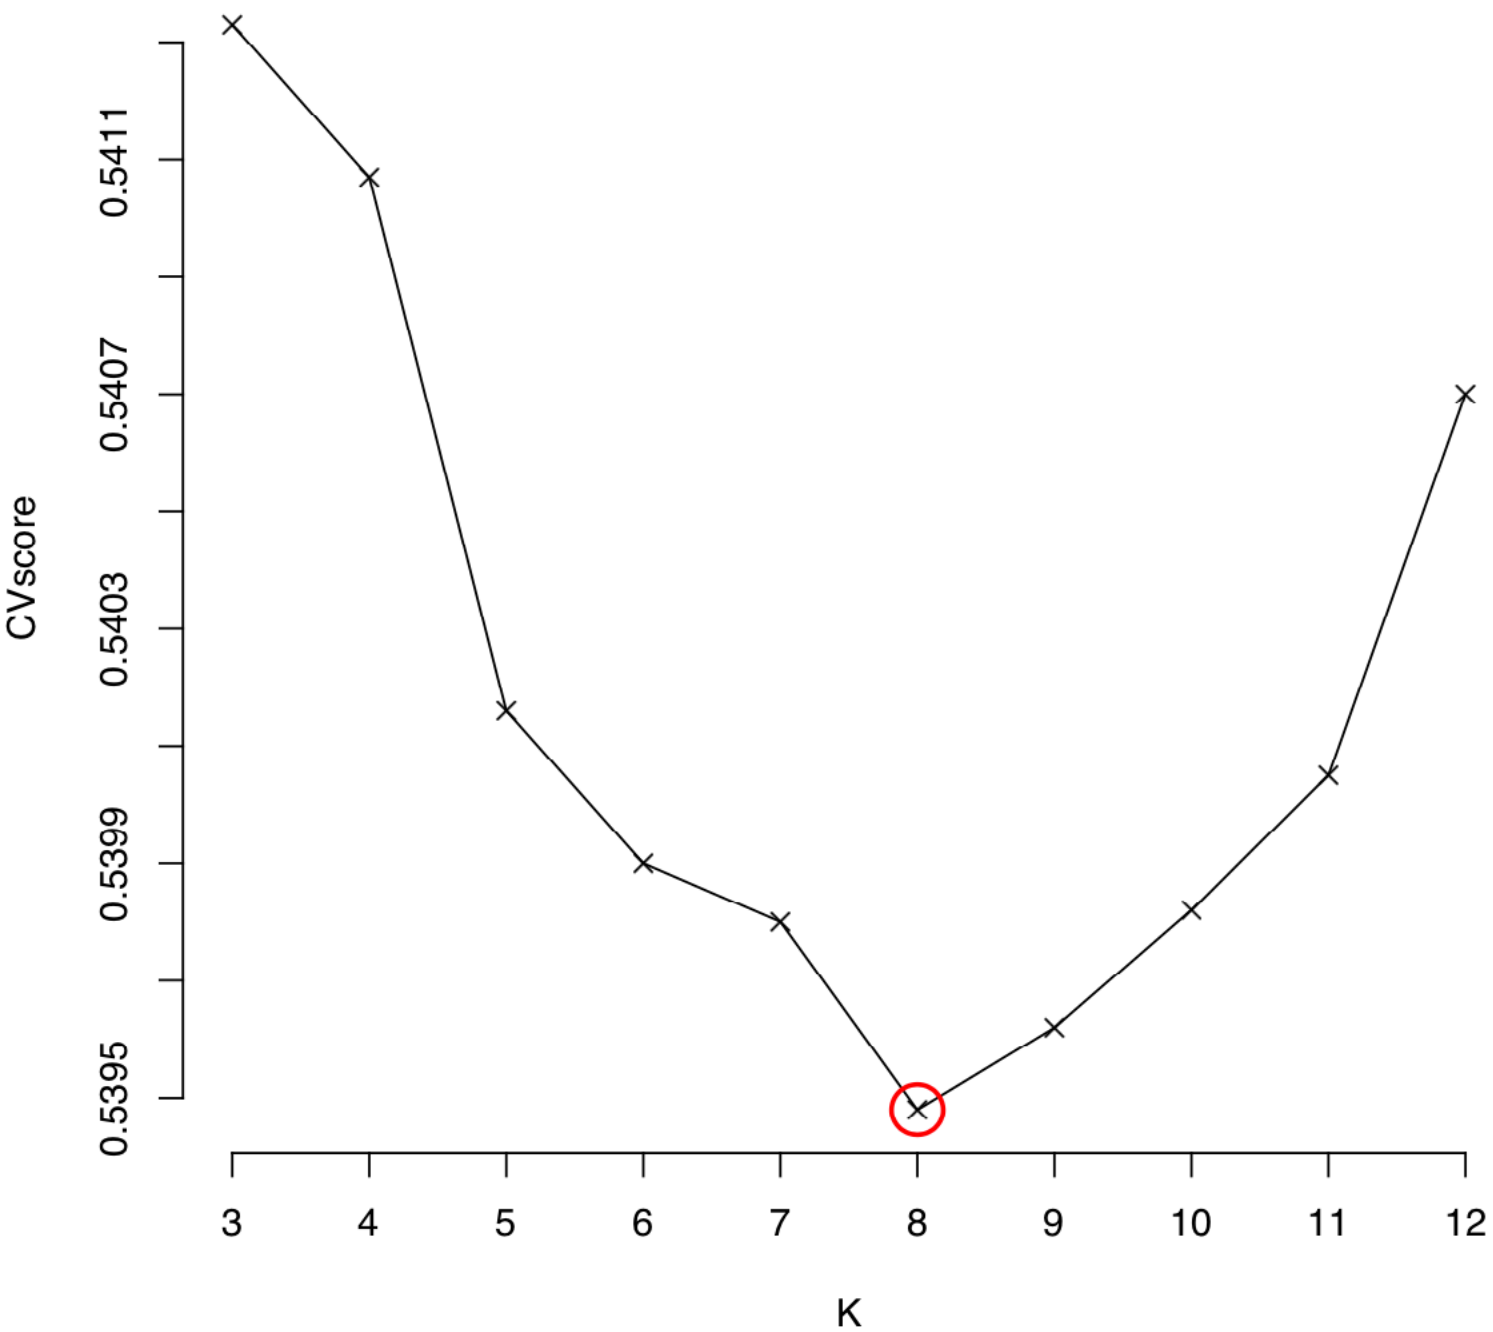

$K=3$

1KGP

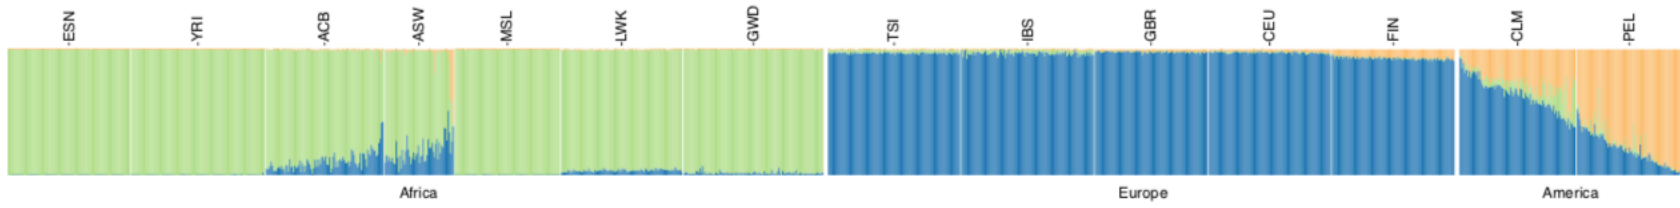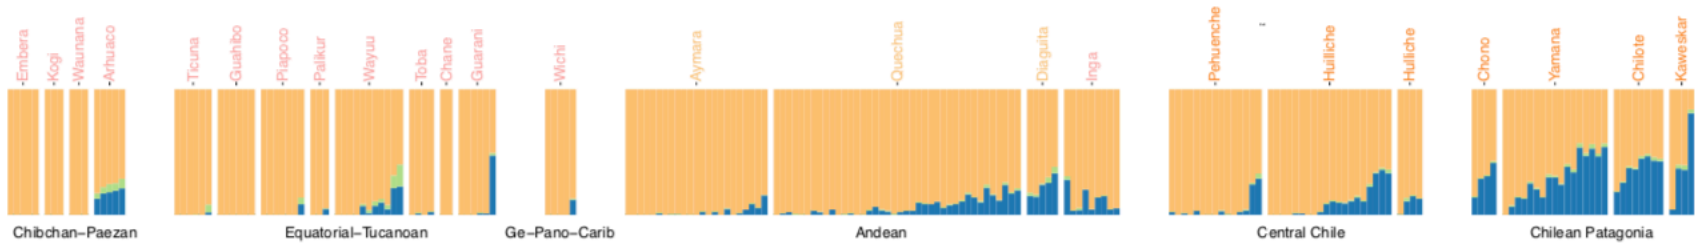

Reich et al. 2012  
+  
de la Fuente et al. 2018

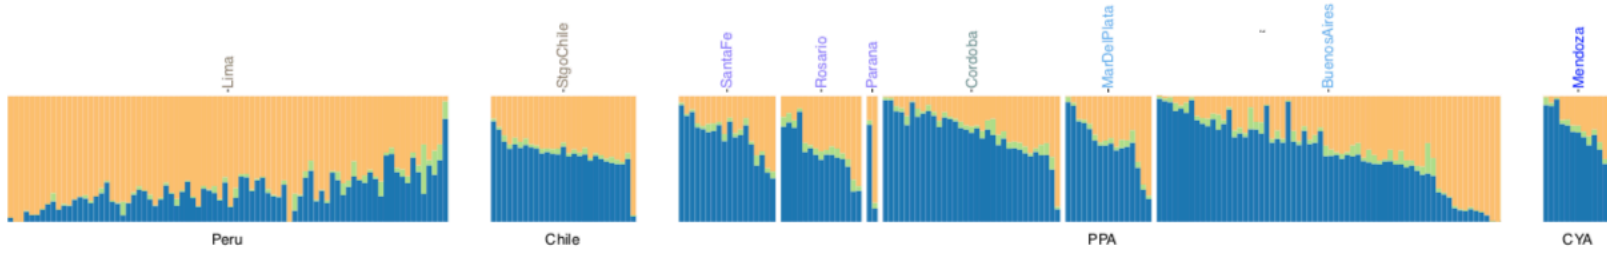

Homburger et al. 2015

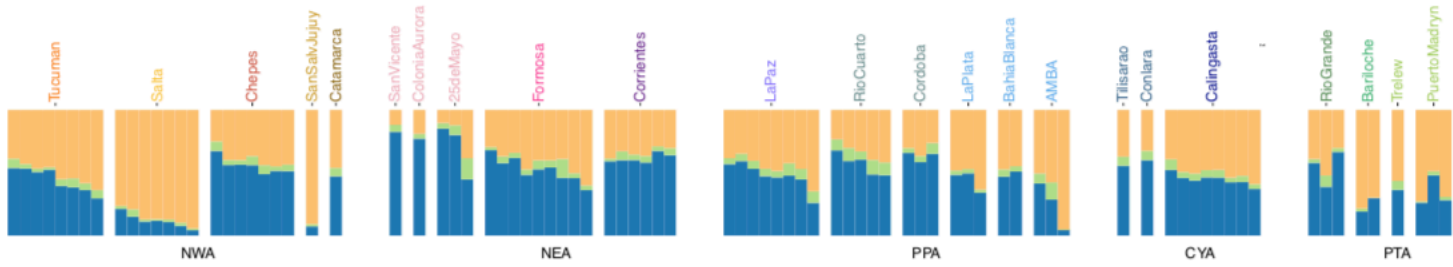

Present Study

C.

$K=4$

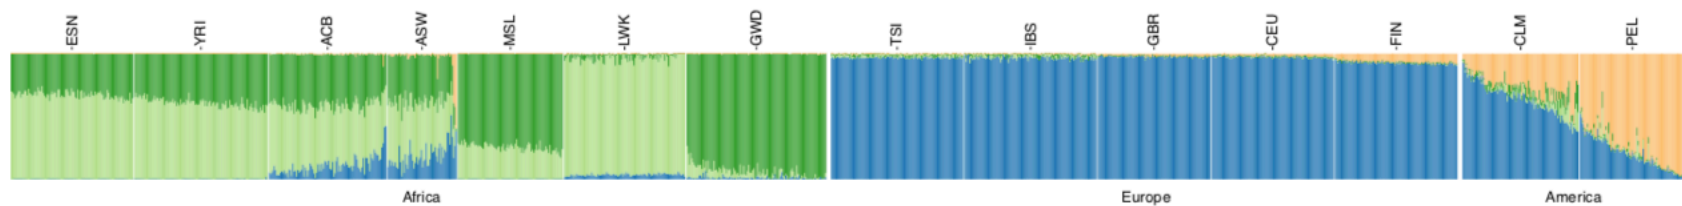

1KGP

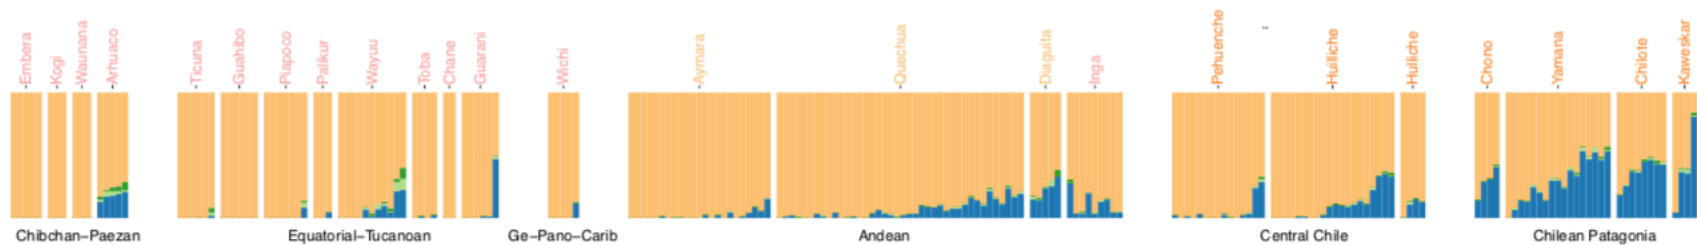

Reich et al. 2012  
+  
de la Fuente et. 2018

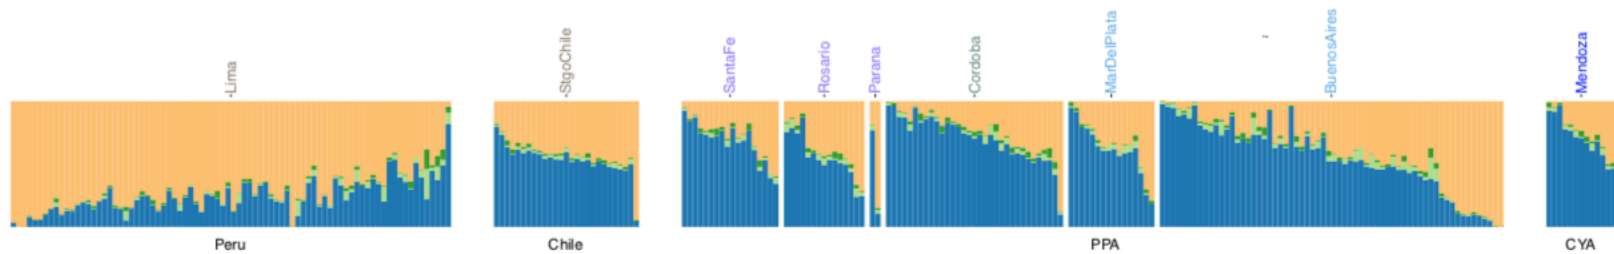

Homburger et al. 2015

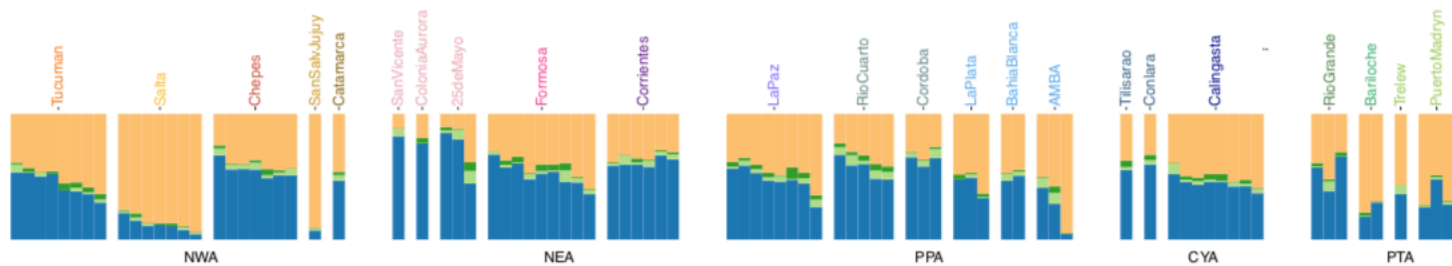

Present Study

$K=5$

1KGP

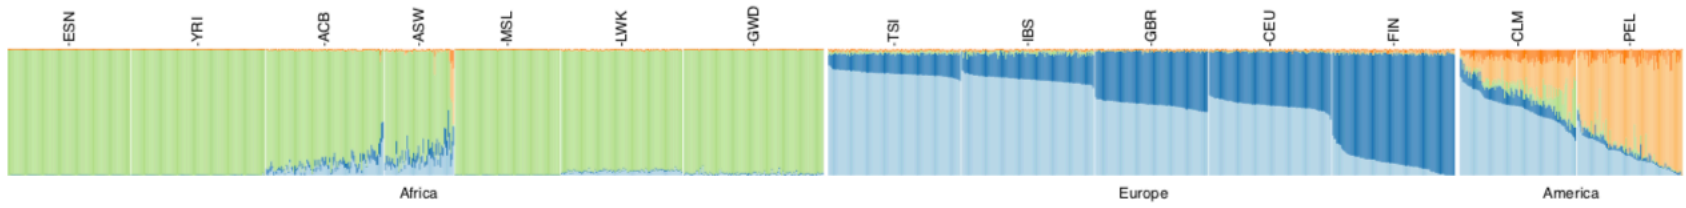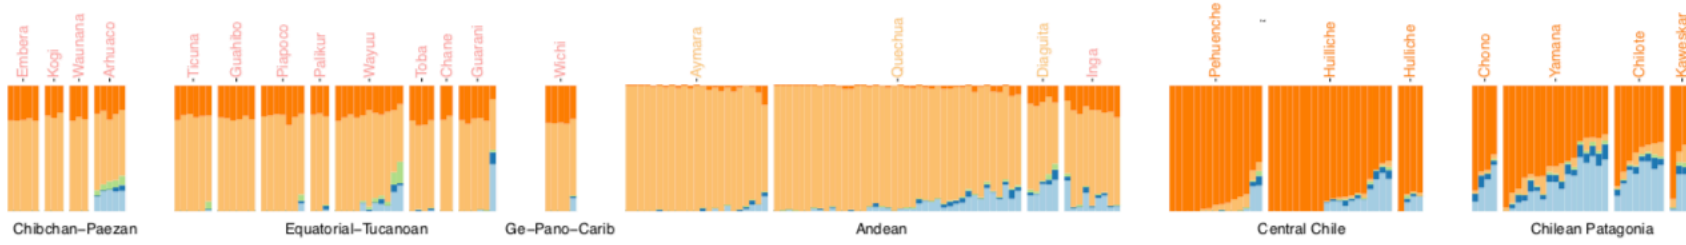

Reich et al. 2012  
+  
de la Fuente et al. 2018

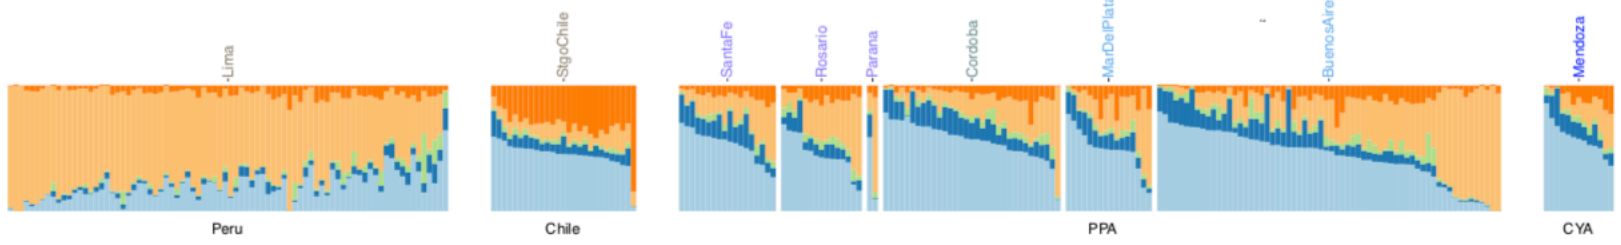

Homburger et al. 2015

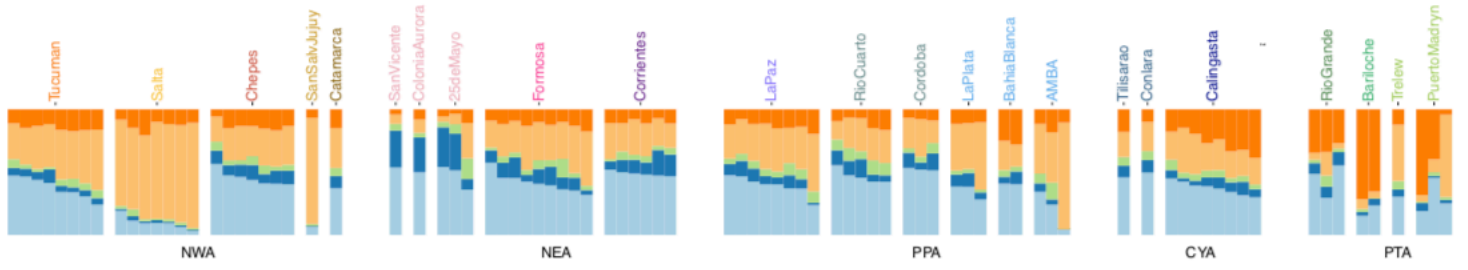

Present Study

$K=6$

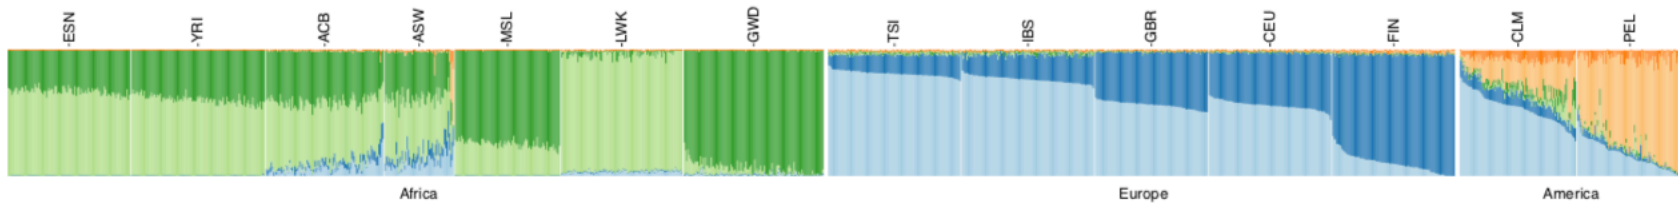

1KGP

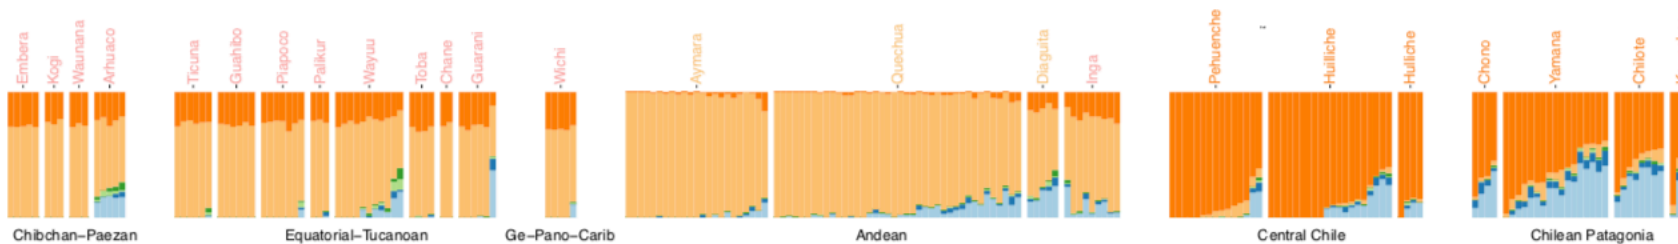

Reich et al. 2012  
+  
de la Fuente et al. 2018

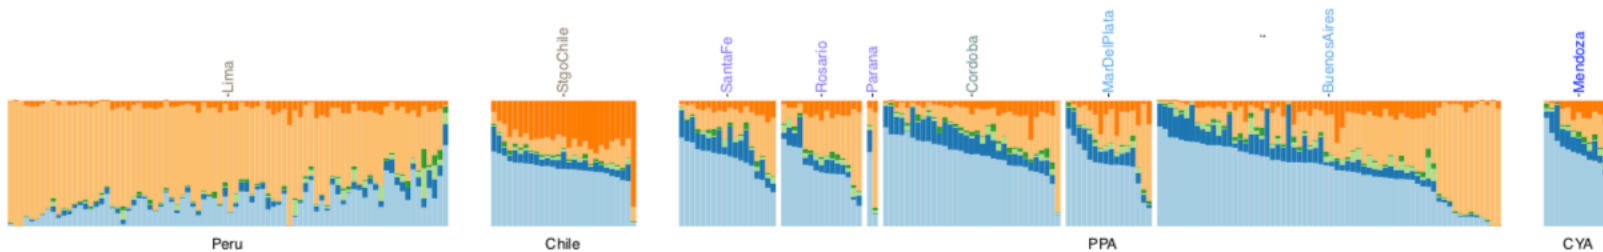

Homburger et al. 2015

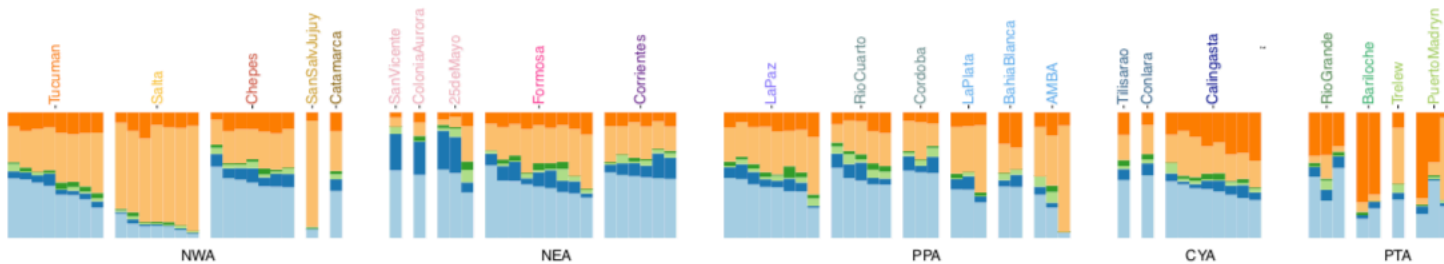

Present Study

$K=7$

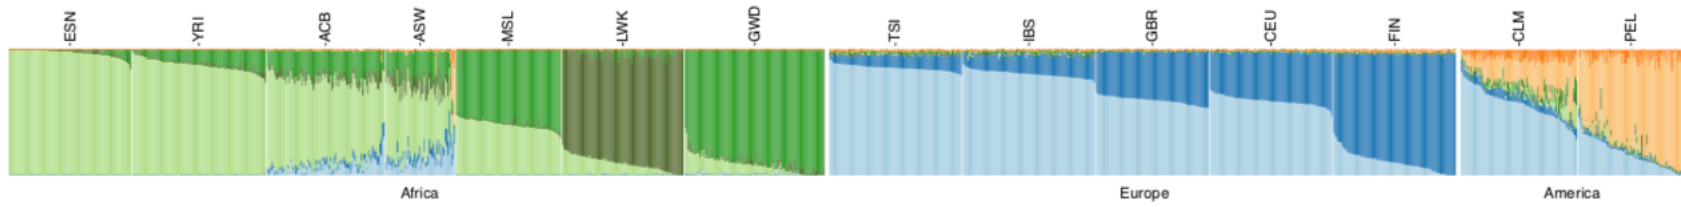

1KGP

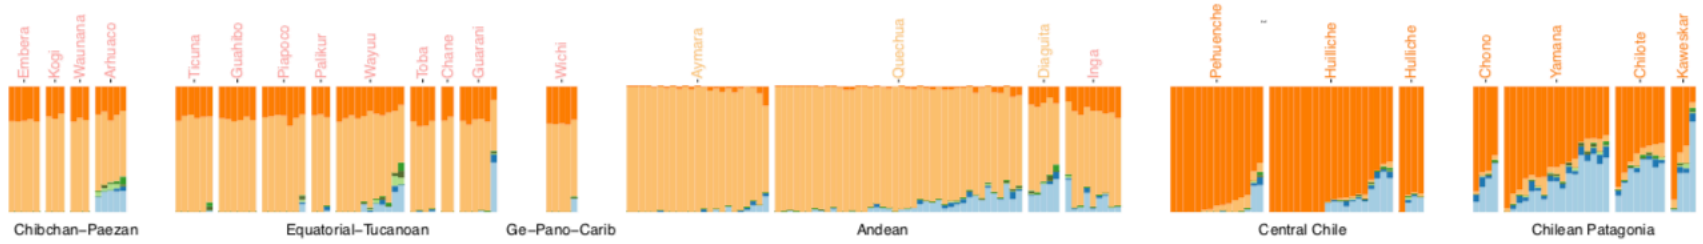

Reich et al. 2012  
+  
de la Fuente et al. 2018

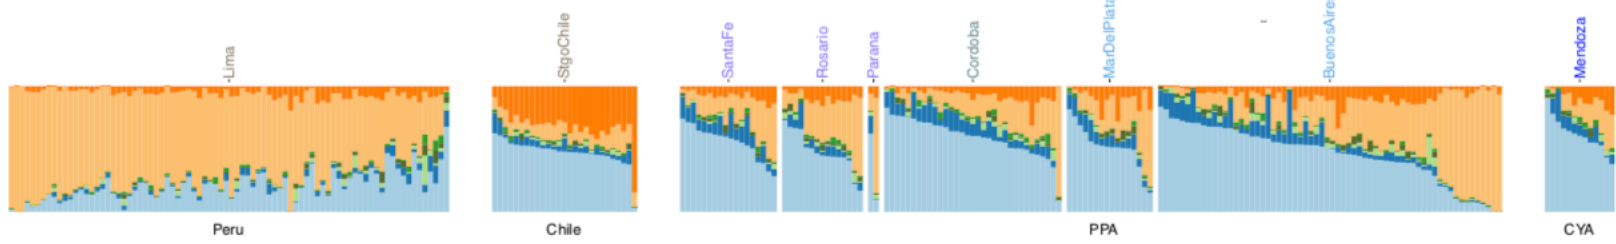

Homburger et al. 2015

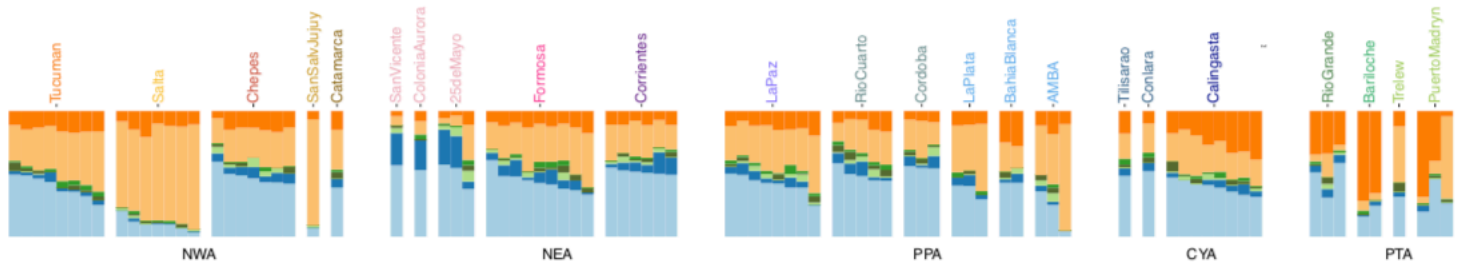

Present Study

G.

$K=8$

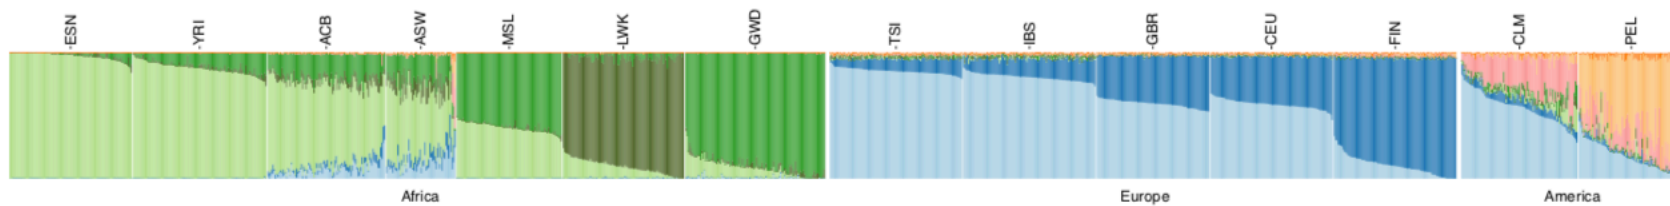

1KGP

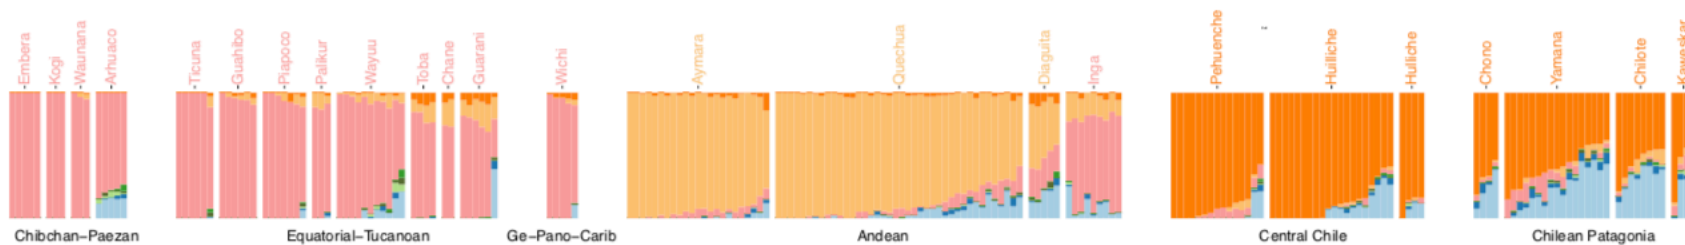

Reich et al. 2012  
+  
de la Fuente et al. 2018

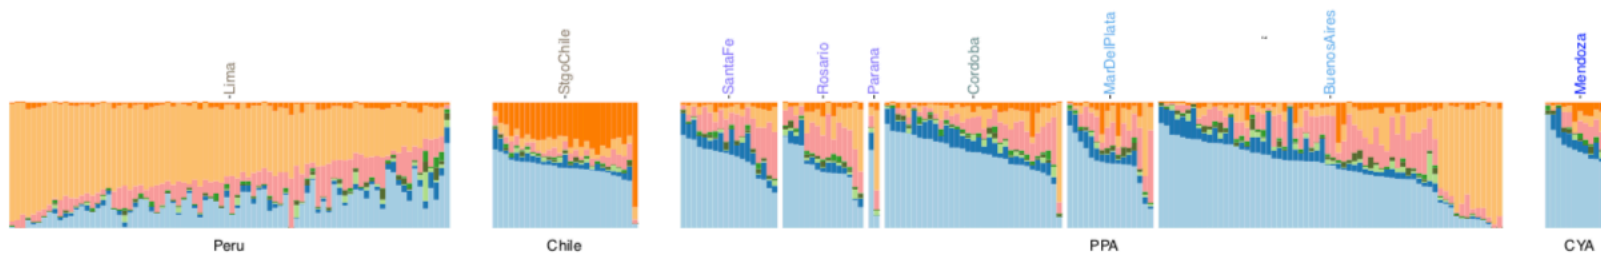

Homburger et al. 2015

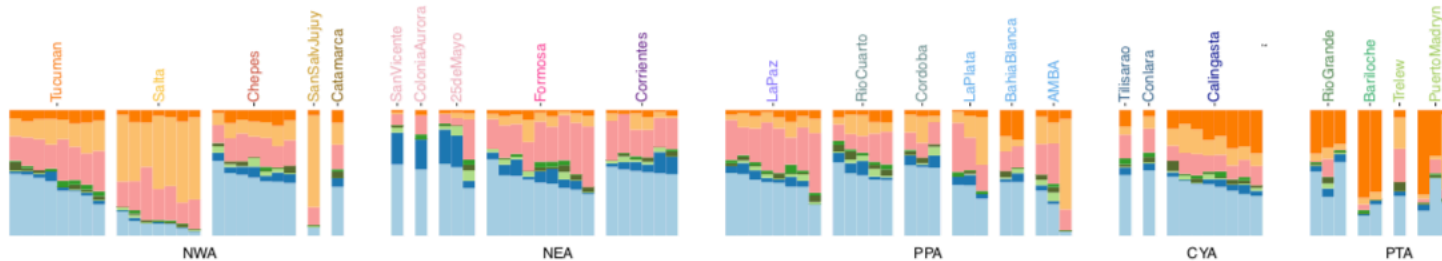

Present Study
