# Supplementary material for: Fine-scale genomic analyses of admixed individuals reveal unrecognized genetic ancestry components in Argentina
Source: PubMed Central journal article supplement (PMC7365470; doi:10.1371/journal.pone.0233808), 2020-07-16

**A.** African ancestry proportion estimates  
Admixture with K=3 and K=8  
Rho = 0.988

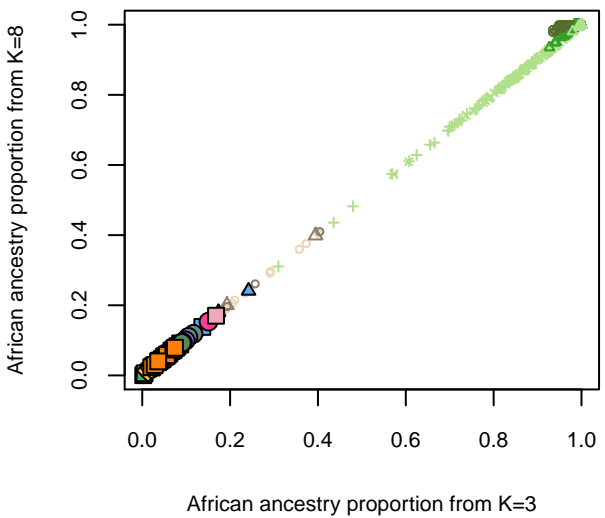

**B.** European ancestry proportion estimates  
Admixture with K=3 and K=8  
Rho = 0.9813

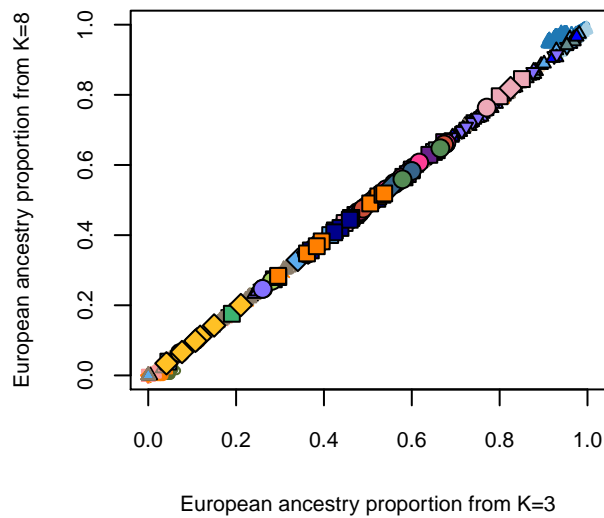

**C.** Native American ancestry proportion estimates  
Admixture with K=3 and K=8  
Rho = 0.9585

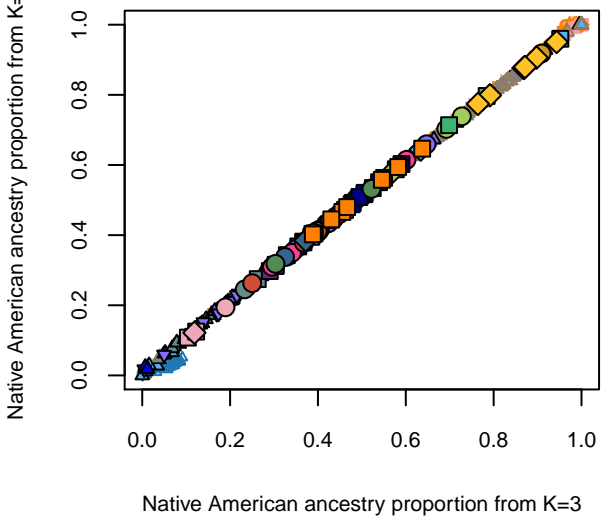

Supplement: pone.0233808.s003.pdf [file pone.0233808.s003.pdf]
