# Supplementary material for: Fine-scale genomic analyses of admixed individuals reveal unrecognized genetic ancestry components in Argentina
Source: PubMed Central journal article supplement (PMC7365470; doi:10.1371/journal.pone.0233808), 2020-07-16

**A.**

Southeastern/Italian ancestry proportion  
in European Masked Genome

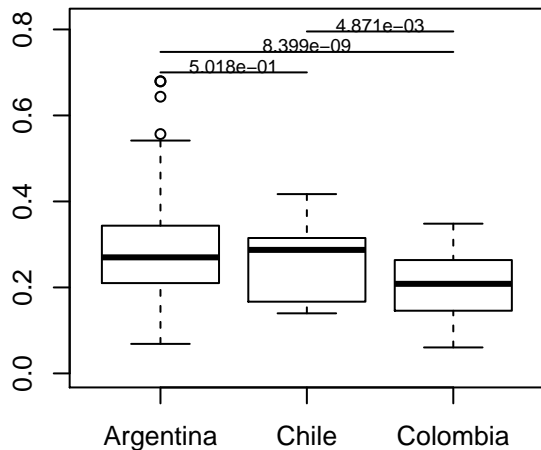**B.**

Iberian ancestry proportion  
in European Masked Genome

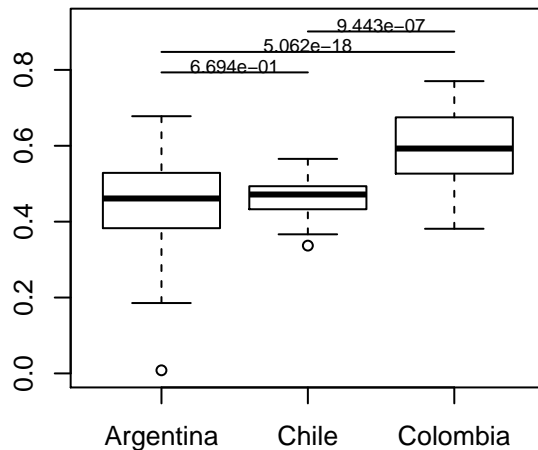**C.**

Northern European ancestry proportion  
in European Masked Genome

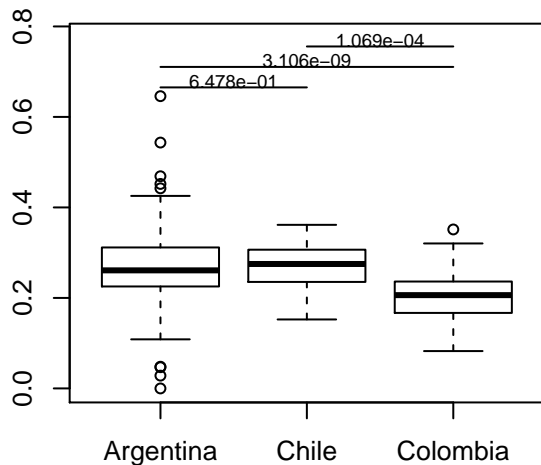

Supplement: pone.0233808.s008.pdf [file pone.0233808.s008.pdf]
