# Supplementary material for: Fine-scale genomic analyses of admixed individuals reveal unrecognized genetic ancestry components in Argentina
Source: PubMed Central journal article supplement (PMC7365470; doi:10.1371/journal.pone.0233808), 2020-07-16
Supplement: pone.0233808.s010.pdf [file pone.0233808.s010.pdf]

**A.**

### Cross-Validation Score The African Meta Dataset

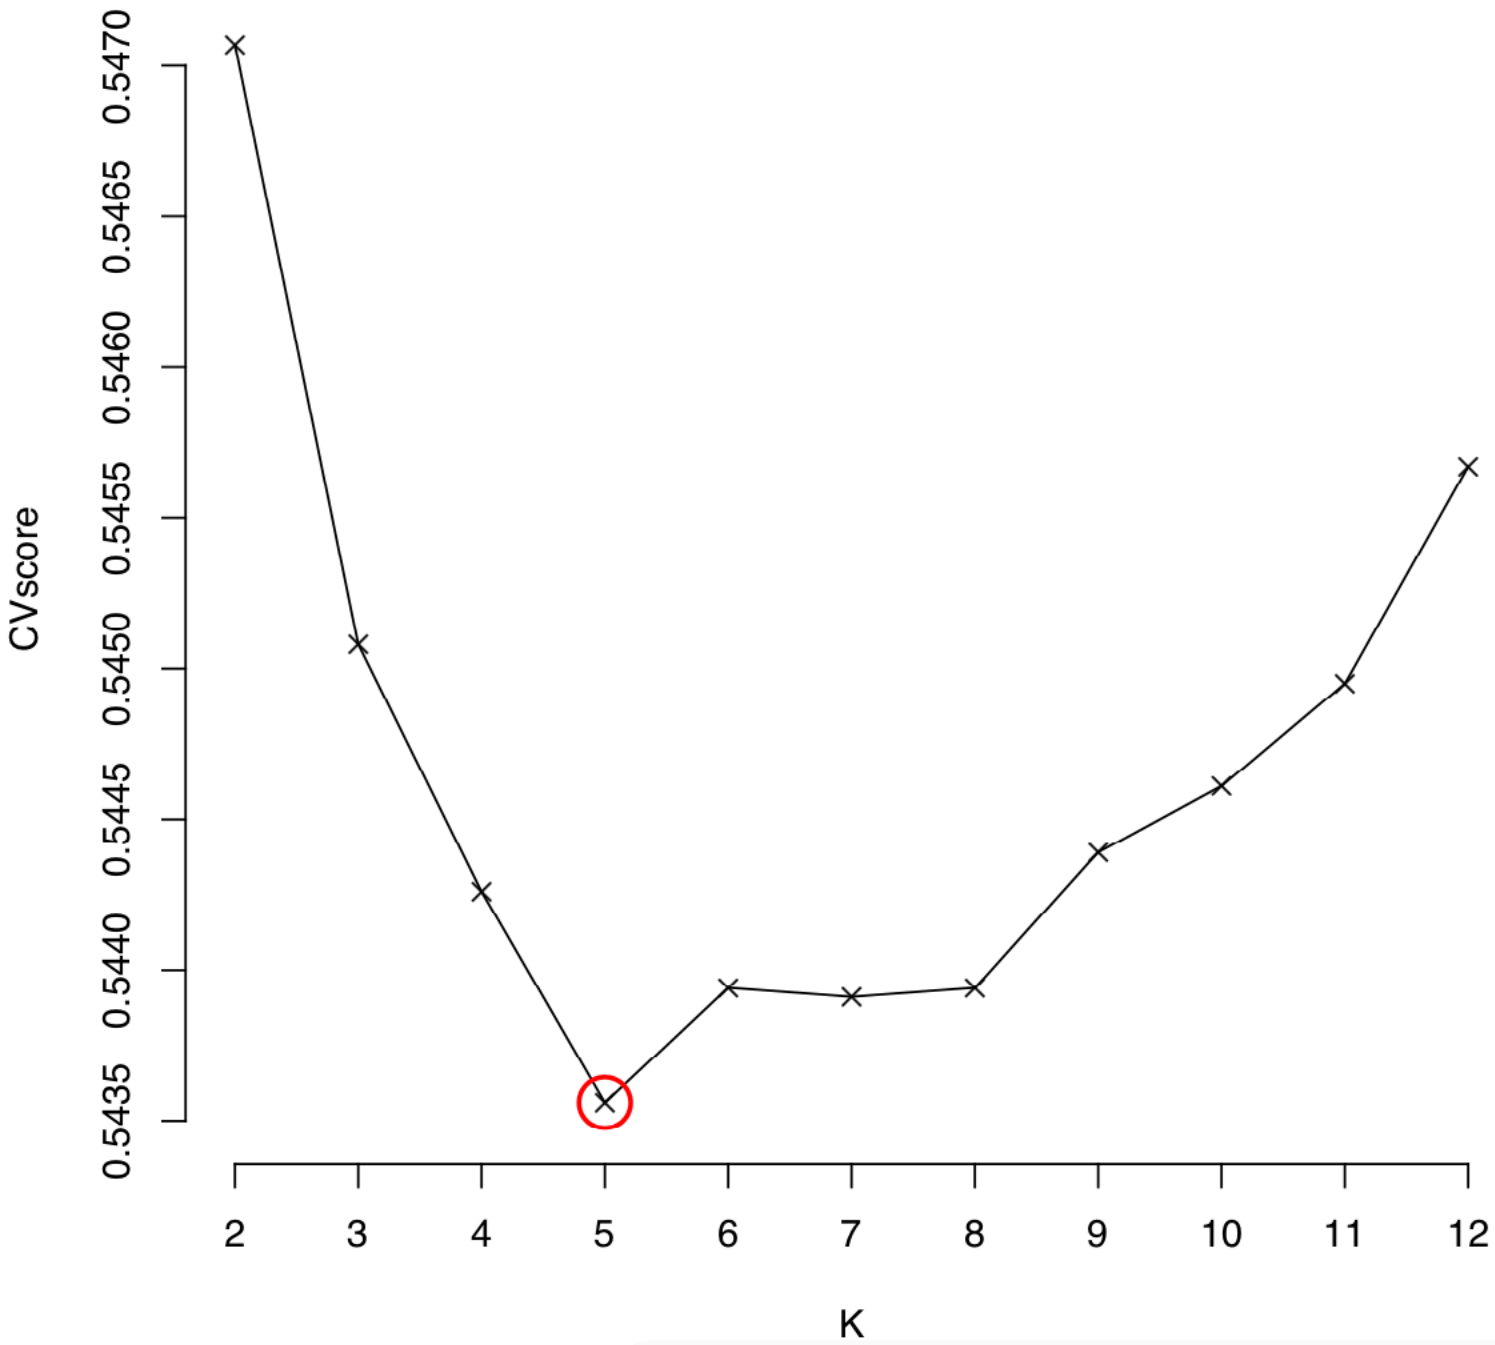

**B.** **$K=2$** 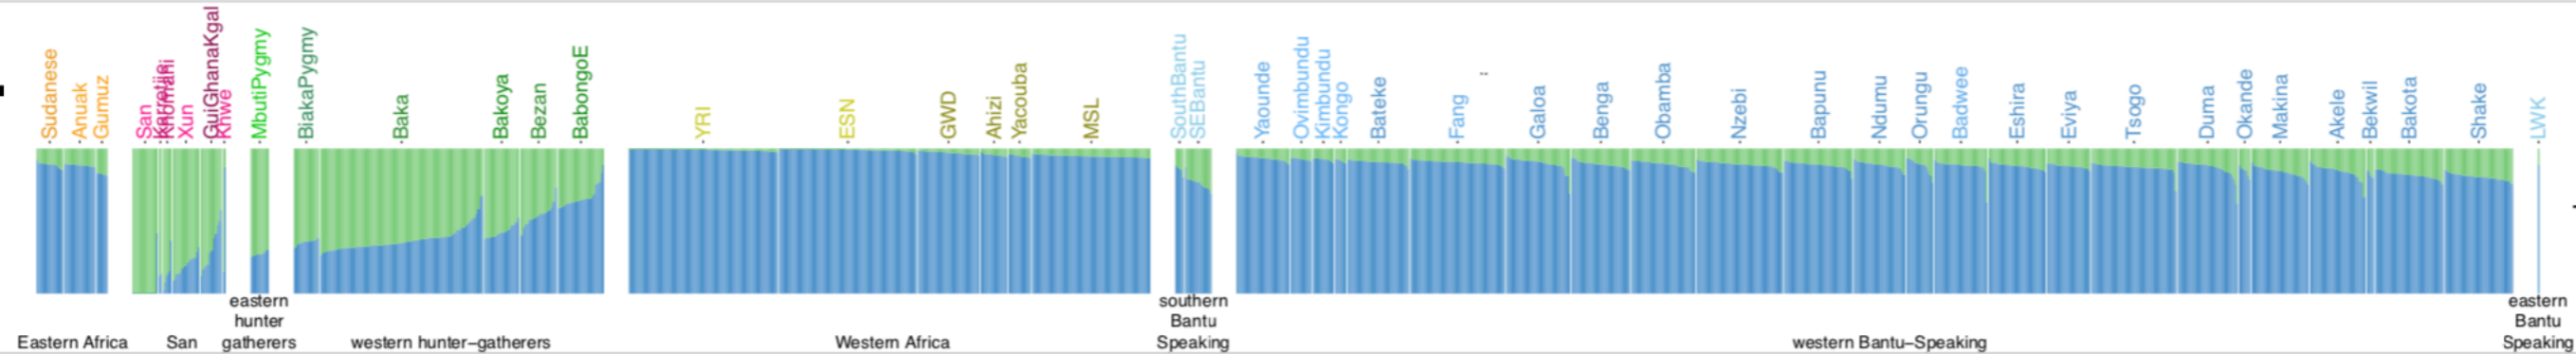

1KGP  
 + Schlebusch et al. 2012  
 + Pagani et al. 2012  
 + Patin et al. 2017

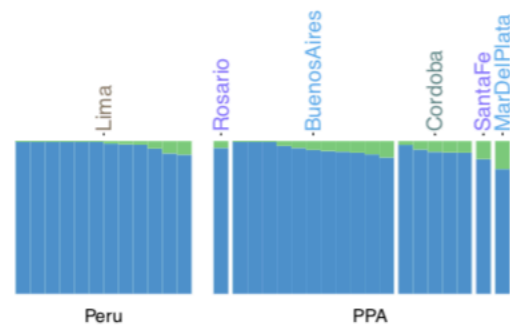

Homburger et al. 2015

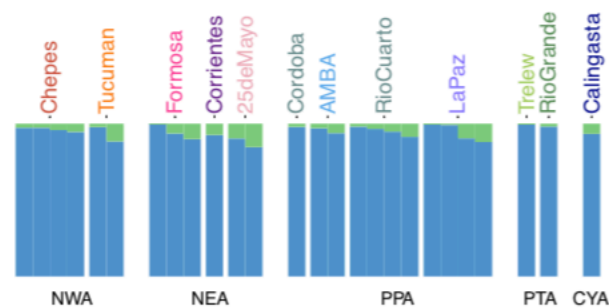

Present Study

**C.** **$K=3$** 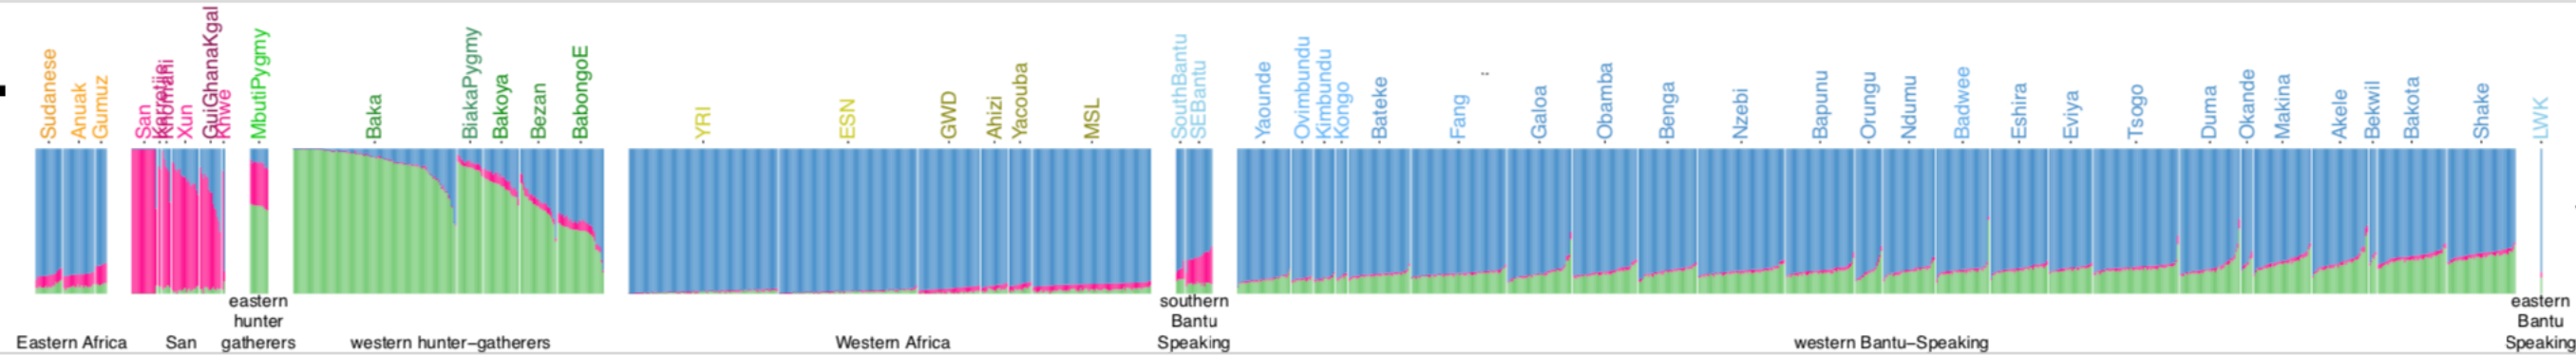

1KGP  
 + Schlebusch et al. 2012  
 + Pagani et al. 2012  
 + Patin et al. 2017

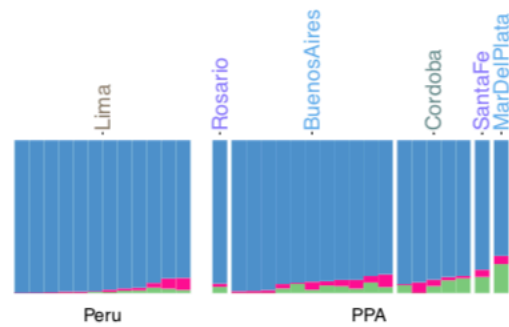

Homburger et al. 2015

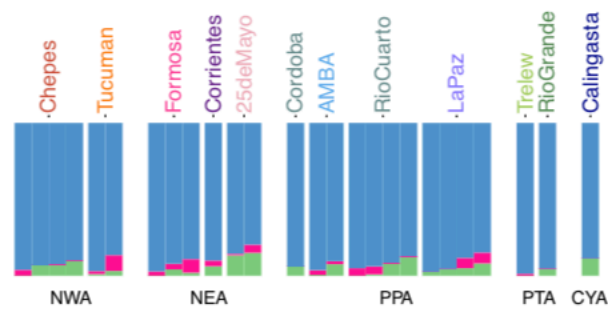

Present Study
