# Supplementary material for: Fine-scale genomic analyses of admixed individuals reveal unrecognized genetic ancestry components in Argentina
Source: PubMed Central journal article supplement (PMC7365470; doi:10.1371/journal.pone.0233808), 2020-07-16

# Choose Number of PCs ASPCA in South America

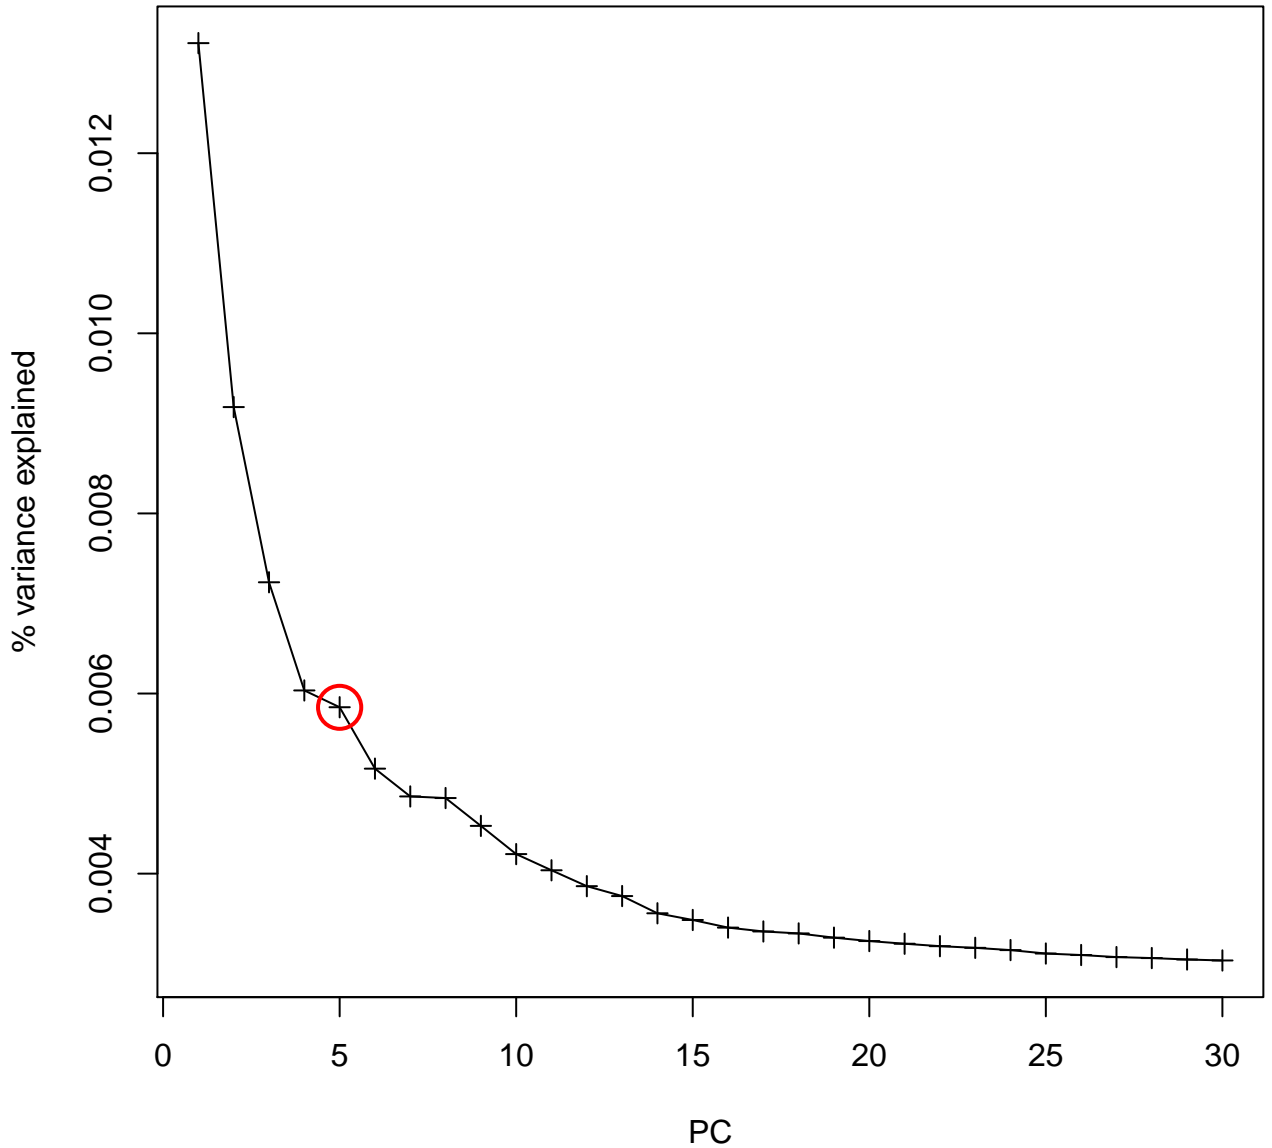

Supplement: pone.0233808.s012.pdf [file pone.0233808.s012.pdf]
