# Supplementary material for: Fine-scale genomic analyses of admixed individuals reveal unrecognized genetic ancestry components in Argentina
Source: PubMed Central journal article supplement (PMC7365470; doi:10.1371/journal.pone.0233808), 2020-07-16

**A.**

### Cross-Validation Score The South American Meta Dataset

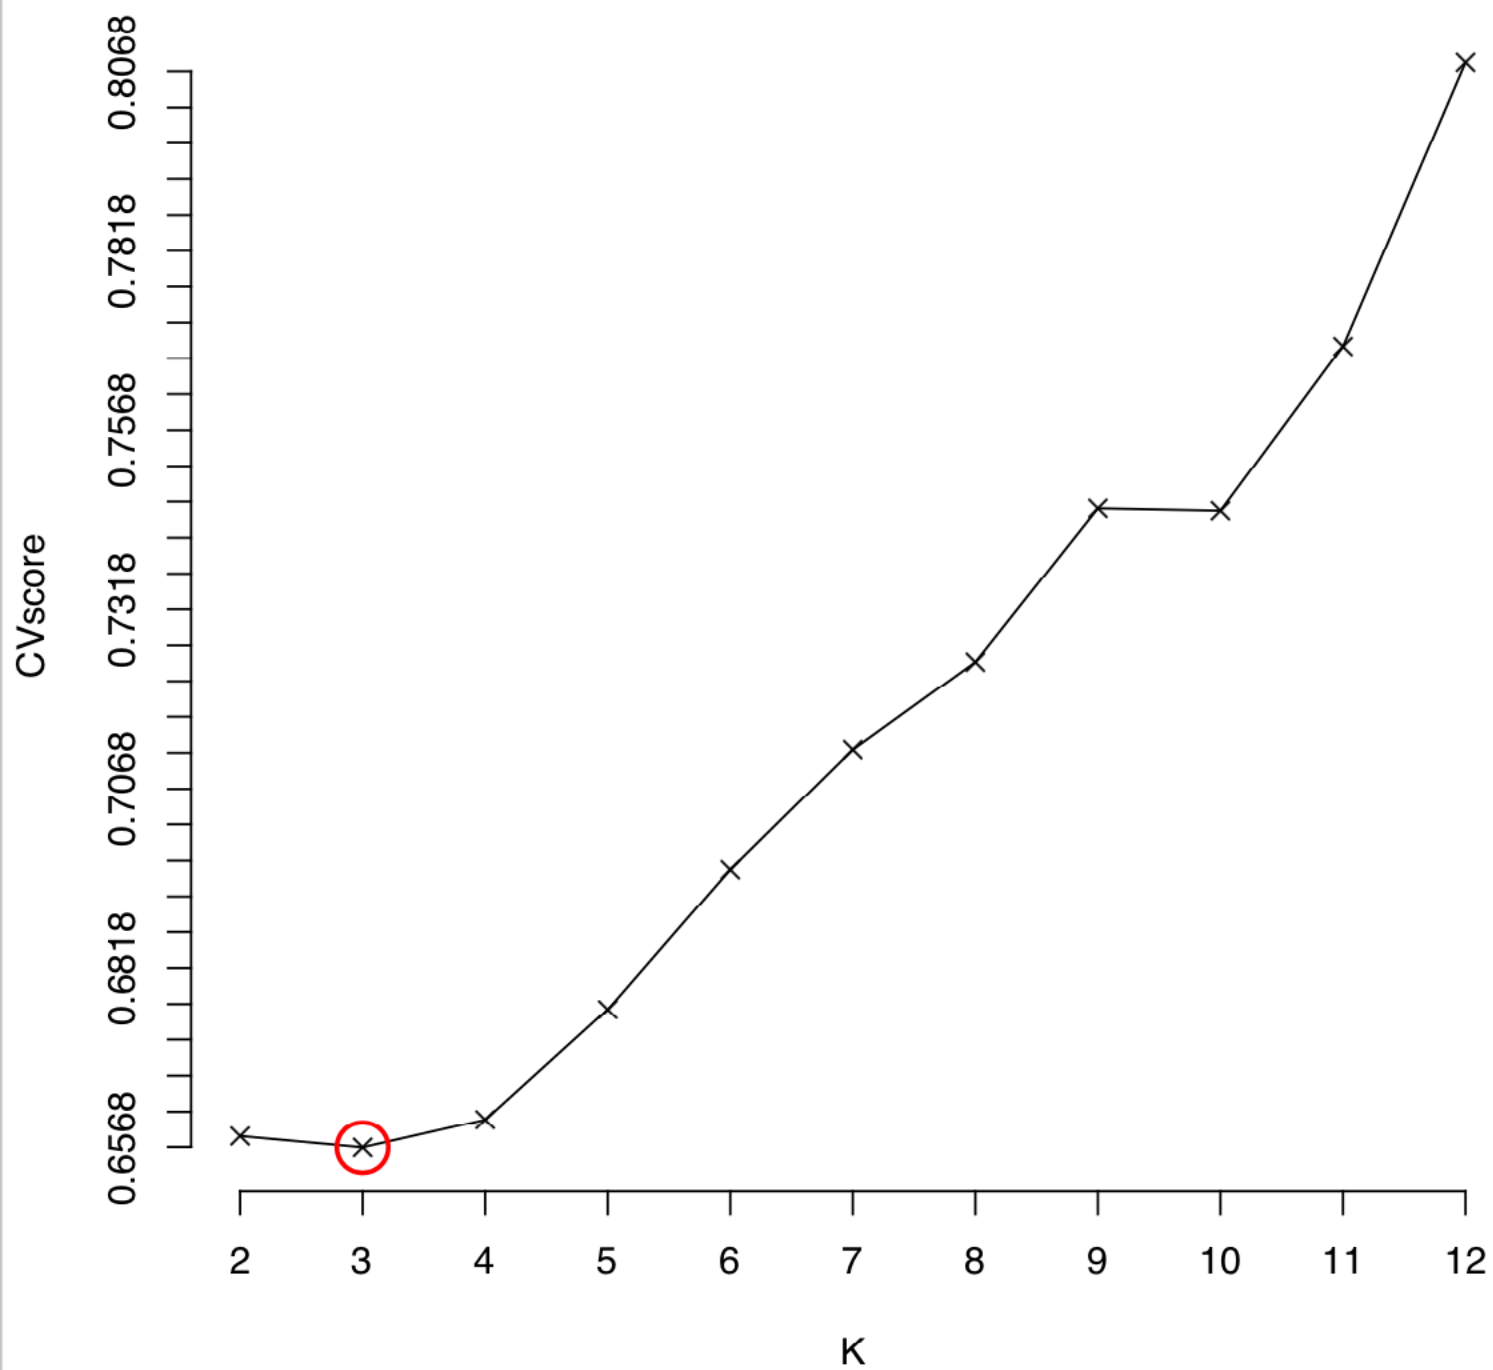

**B.****K=2**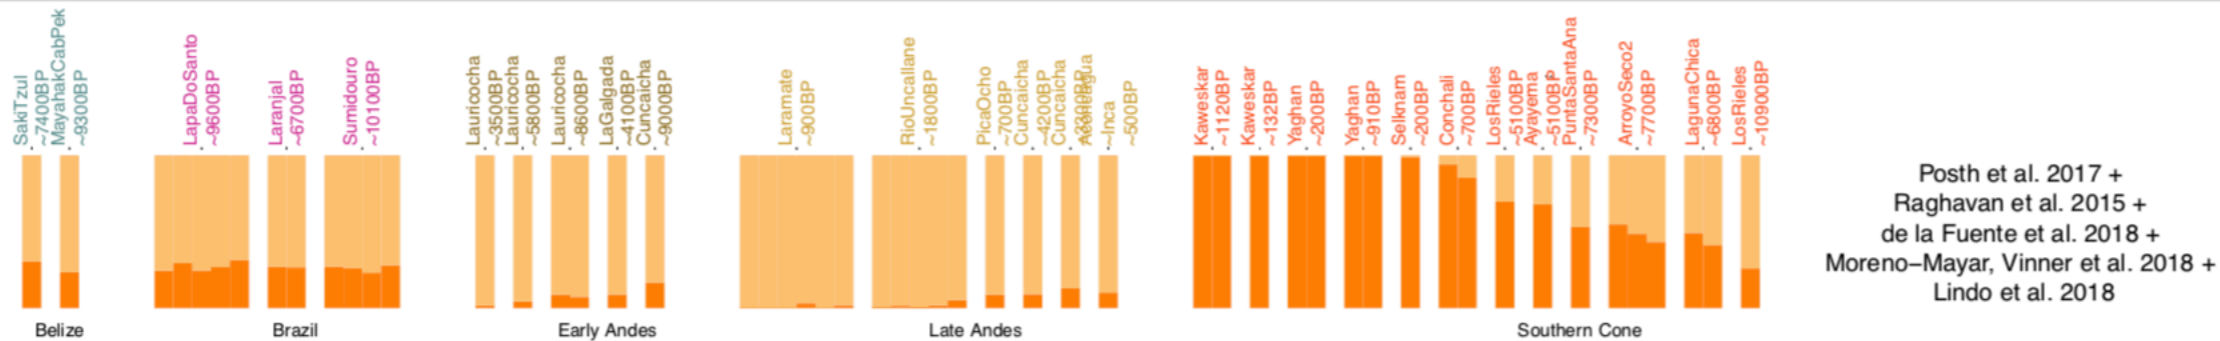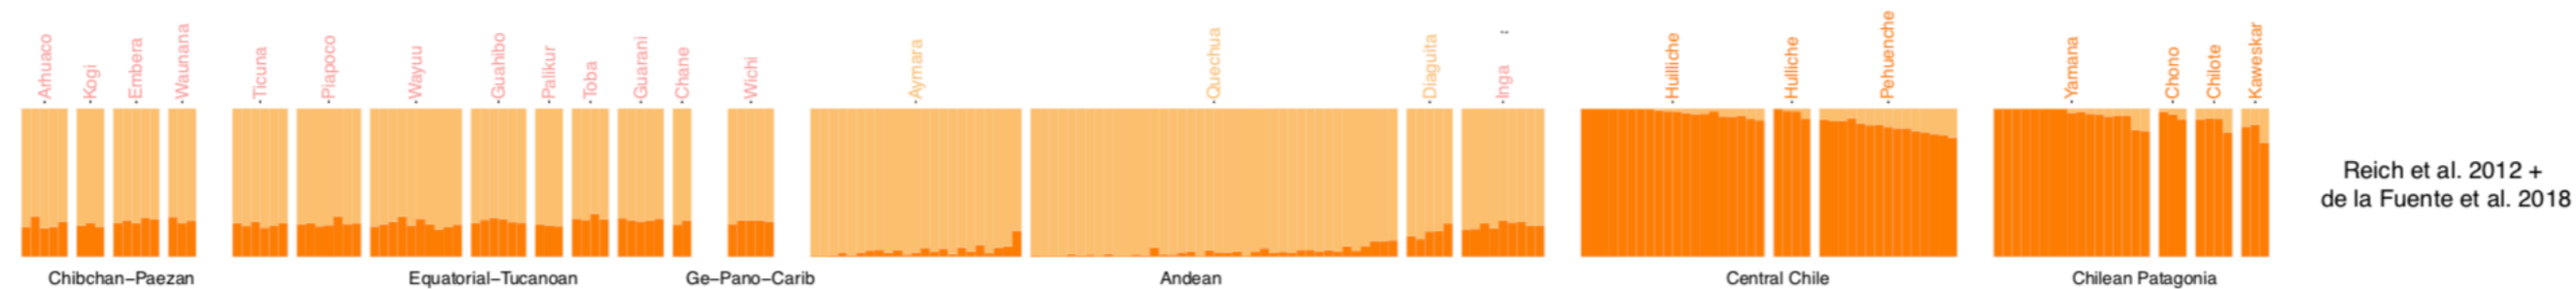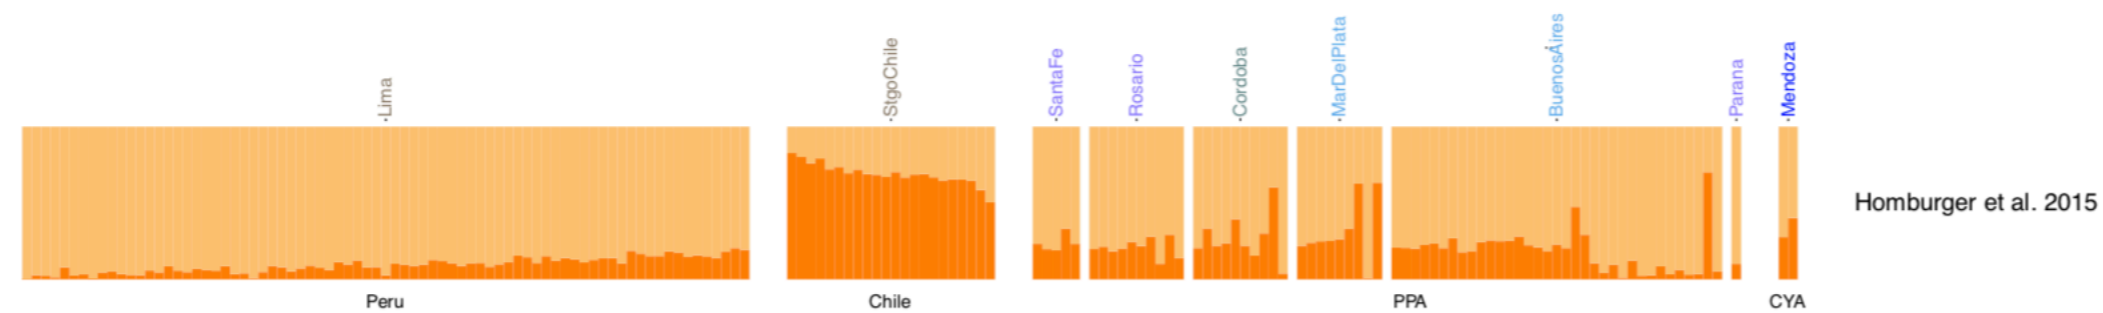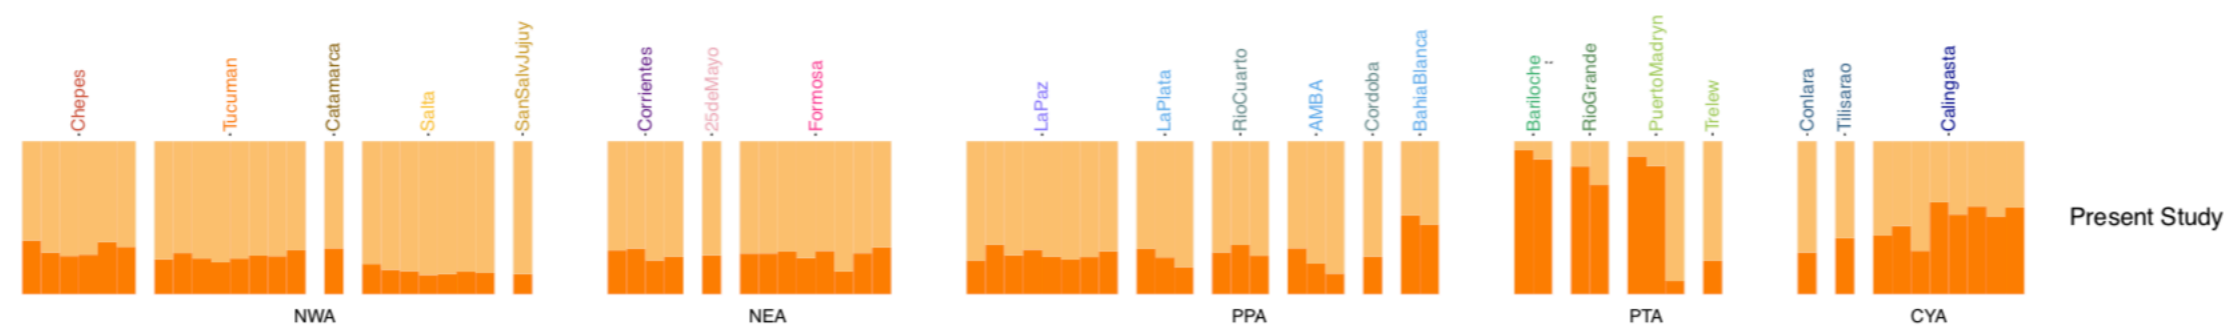

**C.****K=4**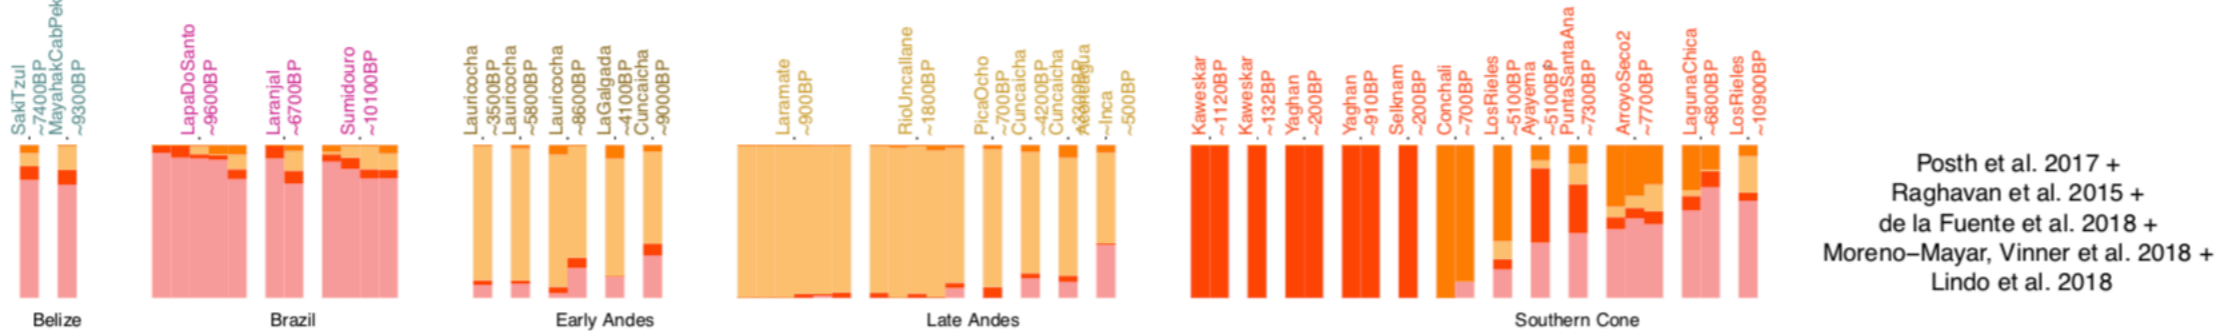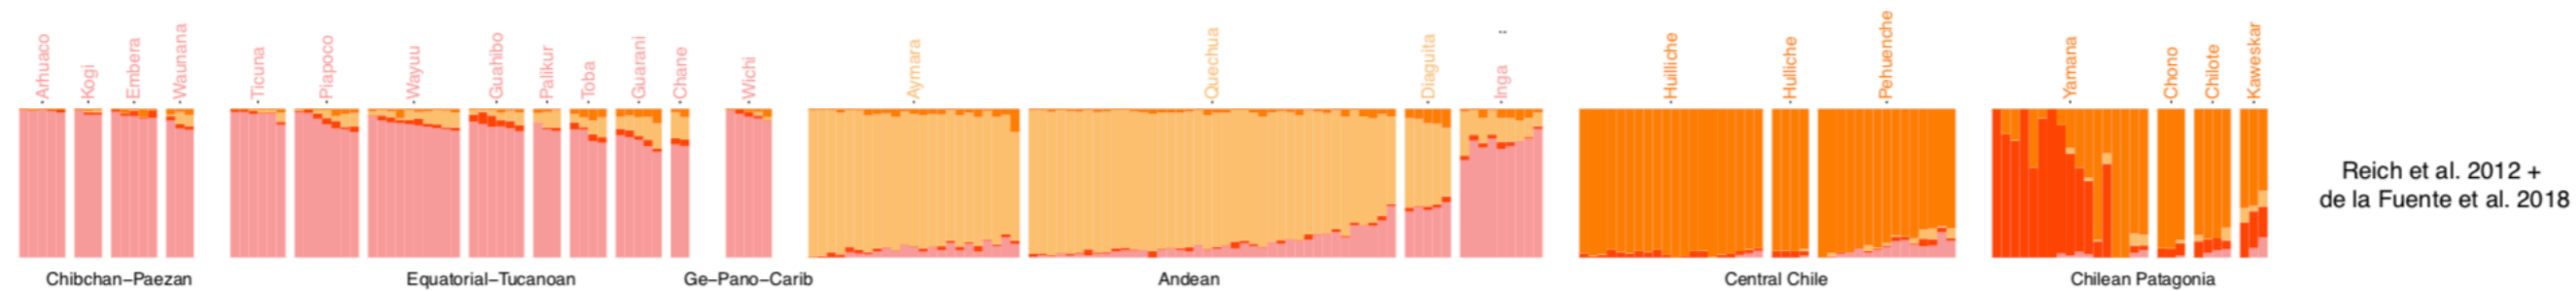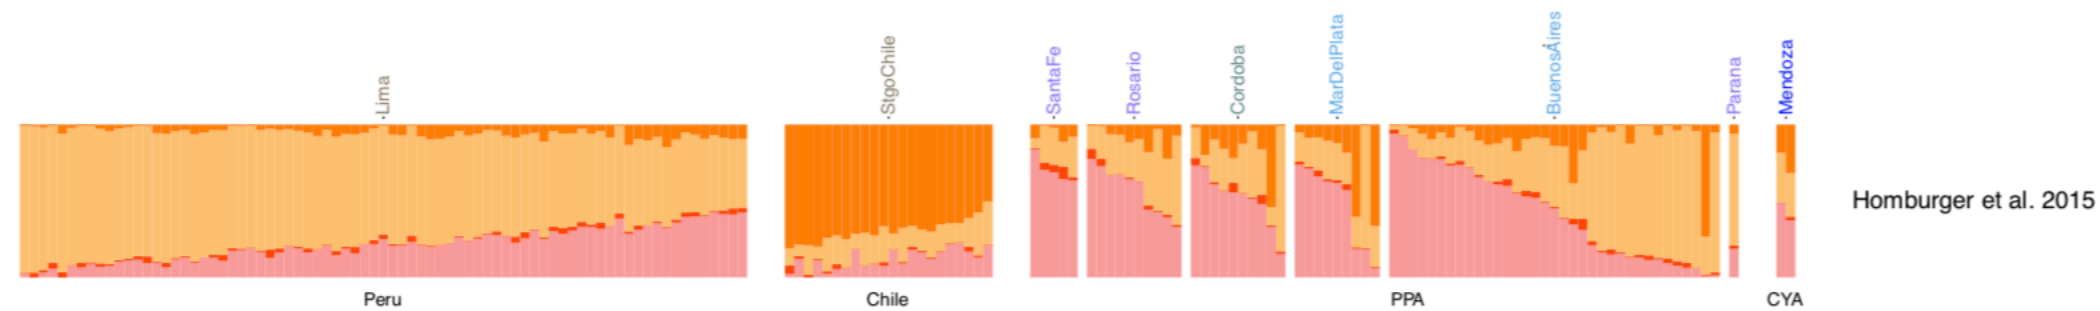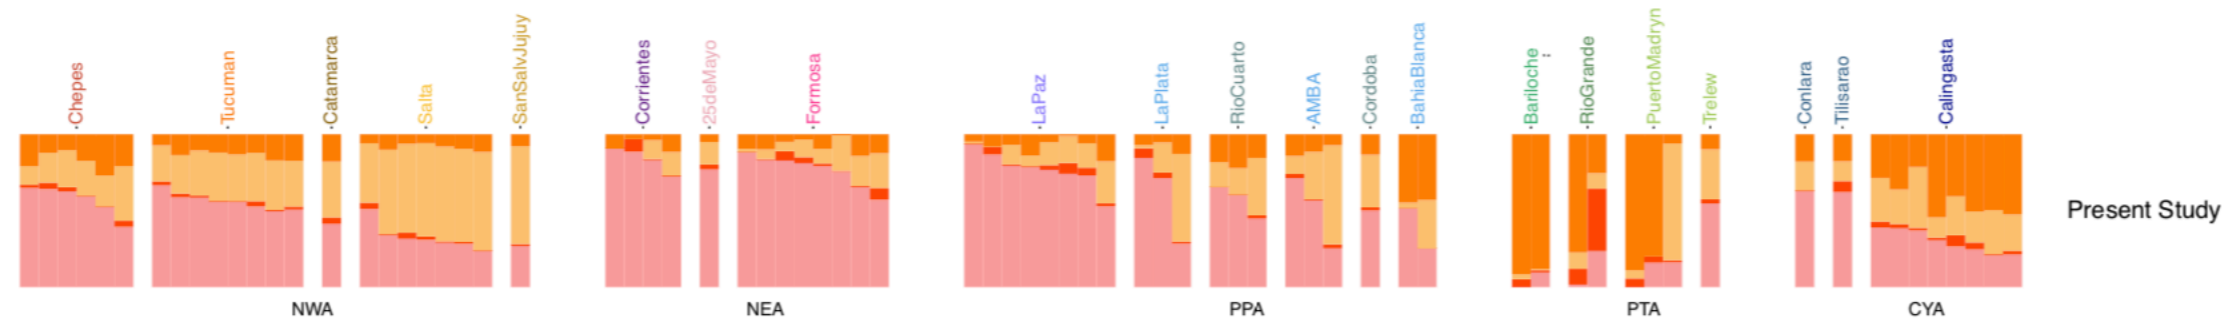

**D.*****K=5***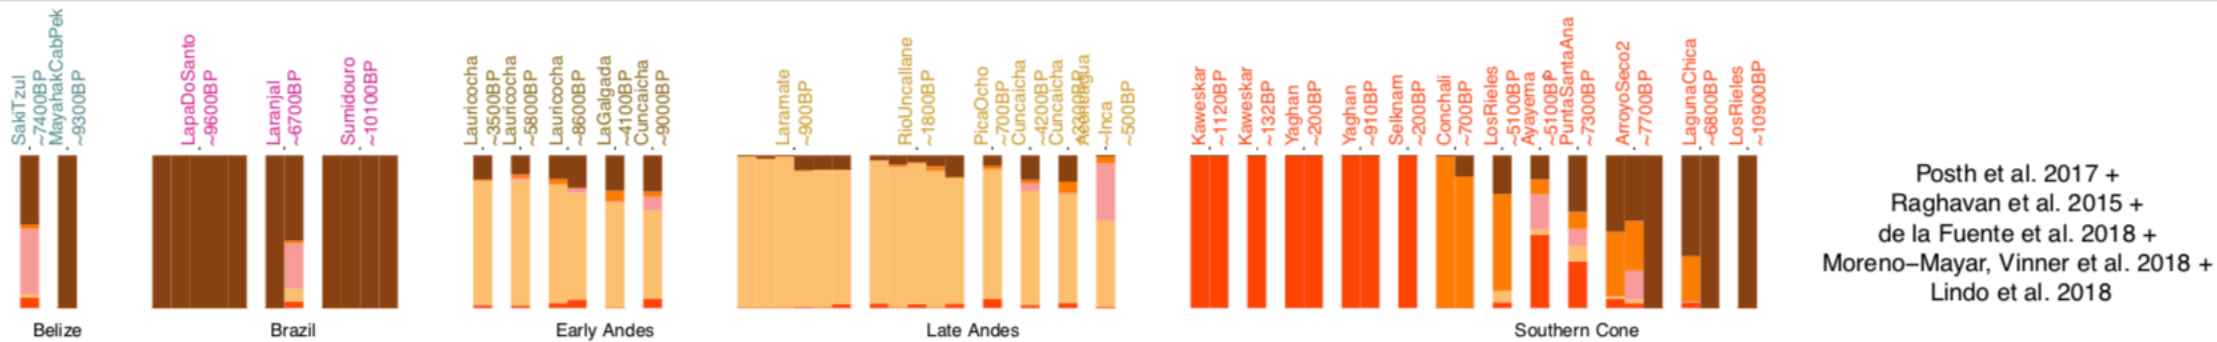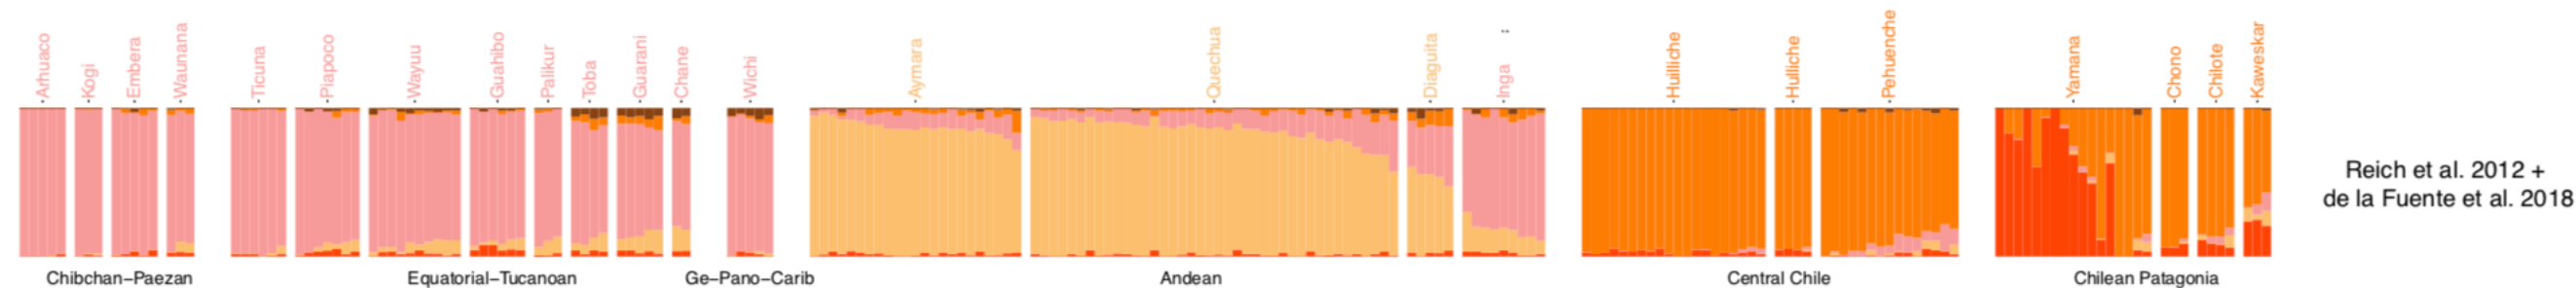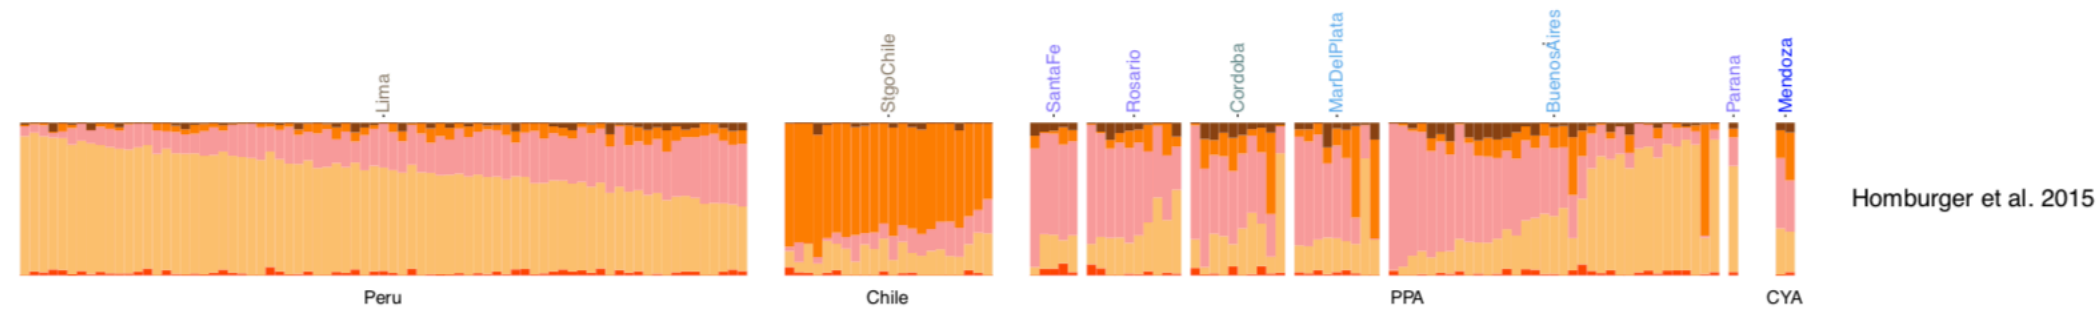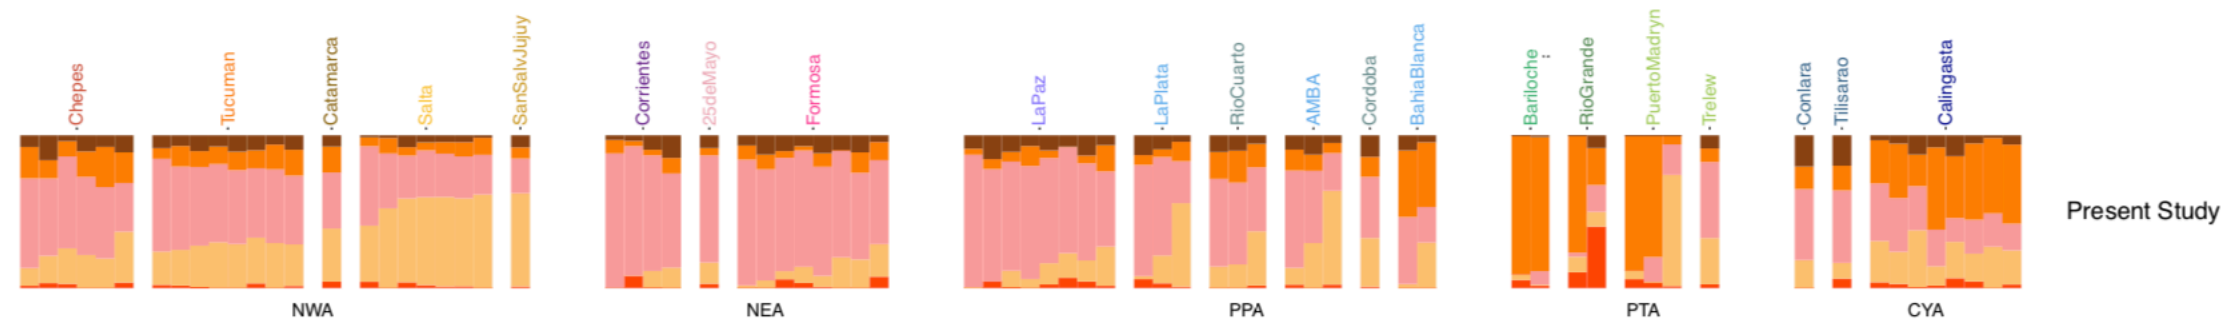

Supplement: pone.0233808.s013.pdf [file pone.0233808.s013.pdf]
