# Supplementary material for: Fine-scale genomic analyses of admixed individuals reveal unrecognized genetic ancestry components in Argentina
Source: PubMed Central journal article supplement (PMC7365470; doi:10.1371/journal.pone.0233808), 2020-07-16

**A.**

**CCP proportion estimates**  
 $\rho = 0.9212$  ( $P = 1.537e-186$ )

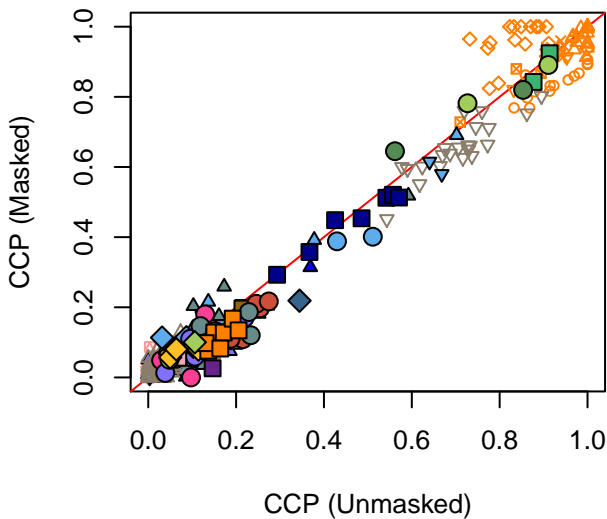**B.**

**STF proportion estimates**  
 $\rho = 0.9599$  ( $P = 1.245e-250$ )

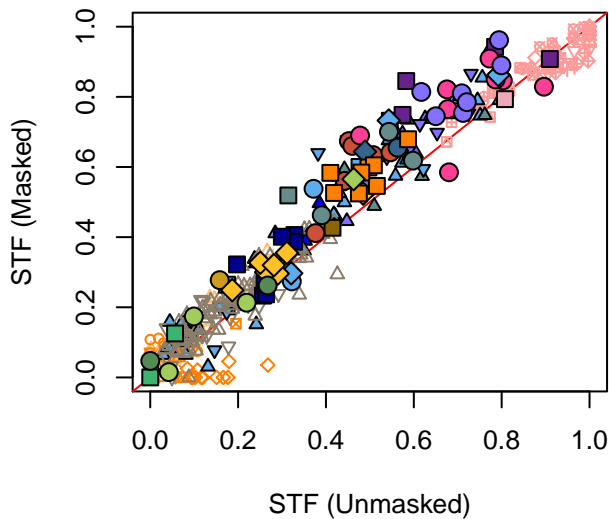**C.**

**CAN proportion estimates**  
 $\rho = 0.9735$  ( $P = 2.136e-290$ )

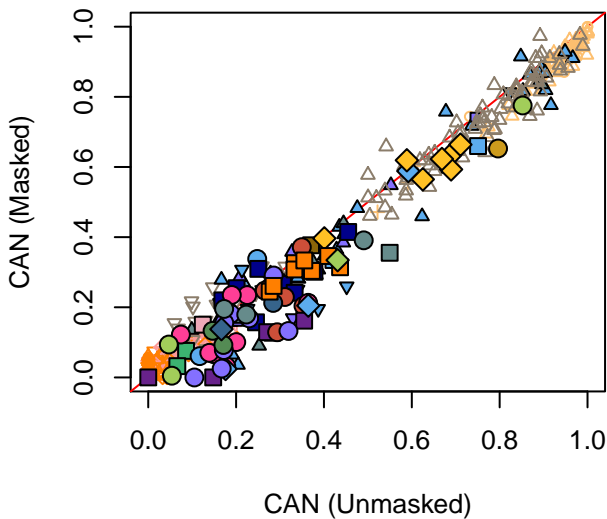

Supplement: pone.0233808.s014.pdf [file pone.0233808.s014.pdf]
