# Supplementary material for: Fine-scale genomic analyses of admixed individuals reveal unrecognized genetic ancestry components in Argentina
Source: PubMed Central journal article supplement (PMC7365470; doi:10.1371/journal.pone.0233808), 2020-07-16
Supplement: pone.0233808.s017.pdf [file pone.0233808.s017.pdf]

**1-f3(YRI;Ind1,Ind2)**  
with Ind1 and Ind2 belonging to Group1 and Group2, respectively

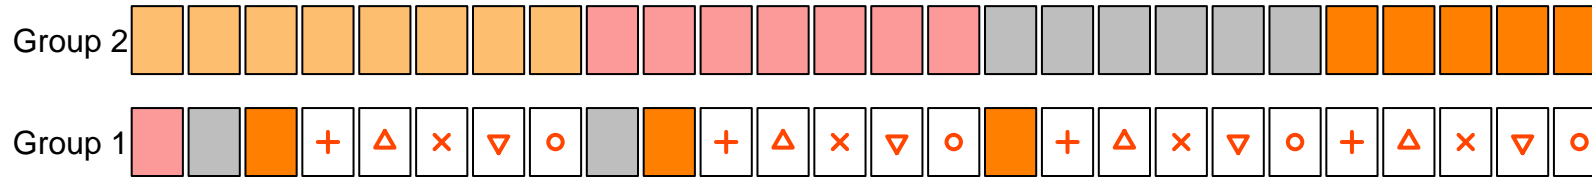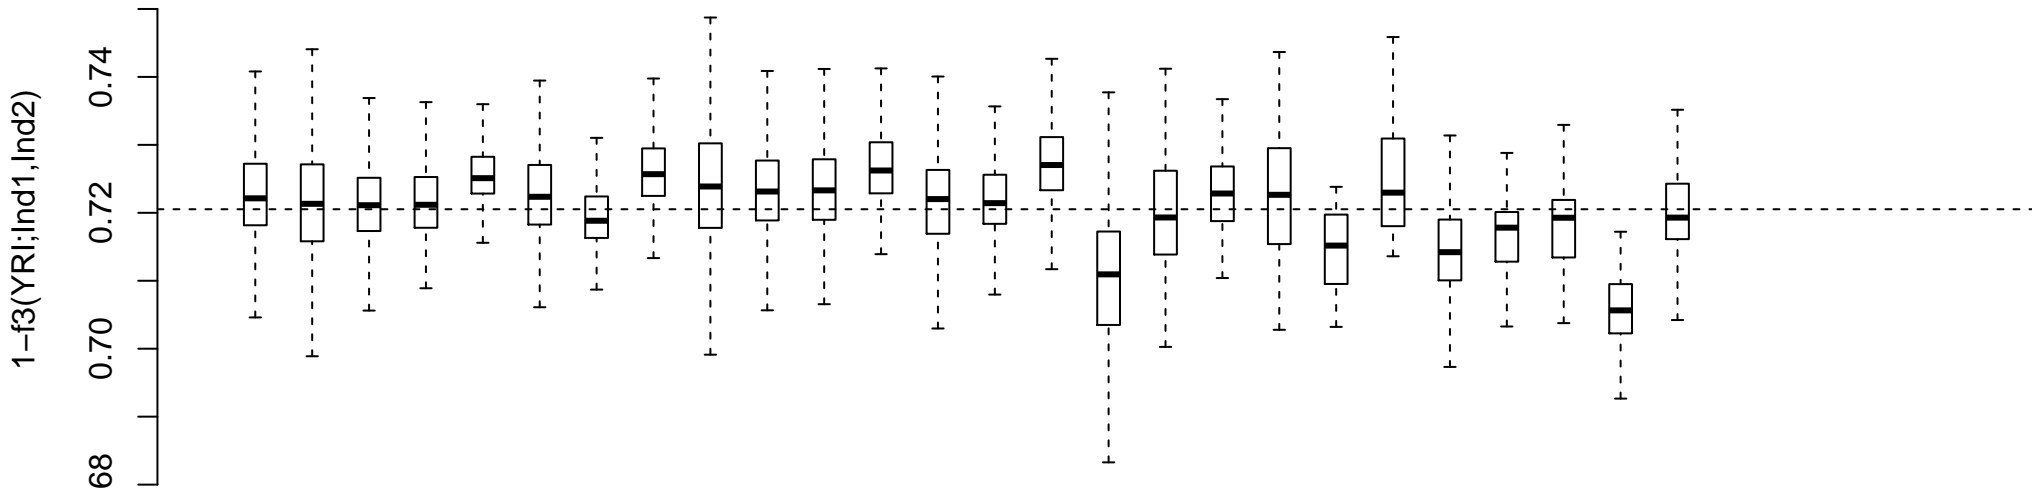

- |   |                         |   |                                  |
|---|-------------------------|---|----------------------------------|
| + | Arroyo Seco 2 ~7700BP   | ■ | Central Western Argentina        |
| ○ | Punta Santa Ana ~7300BP | ■ | Subtropical and Tropical Forests |
| △ | Ayayema ~5100BP         | ■ | Central Chile / Patagonia        |
| × | Laguna Chica ~6800BP    | ■ | Central Andes                    |
| ▽ | Los Rieles ~5100BP      |   |                                  |
