# Supplementary material for: Fine-scale genomic analyses of admixed individuals reveal unrecognized genetic ancestry components in Argentina
Source: PubMed Central journal article supplement (PMC7365470; doi:10.1371/journal.pone.0233808), 2020-07-16

**A.****f3(YRI; CAN, Ancient)**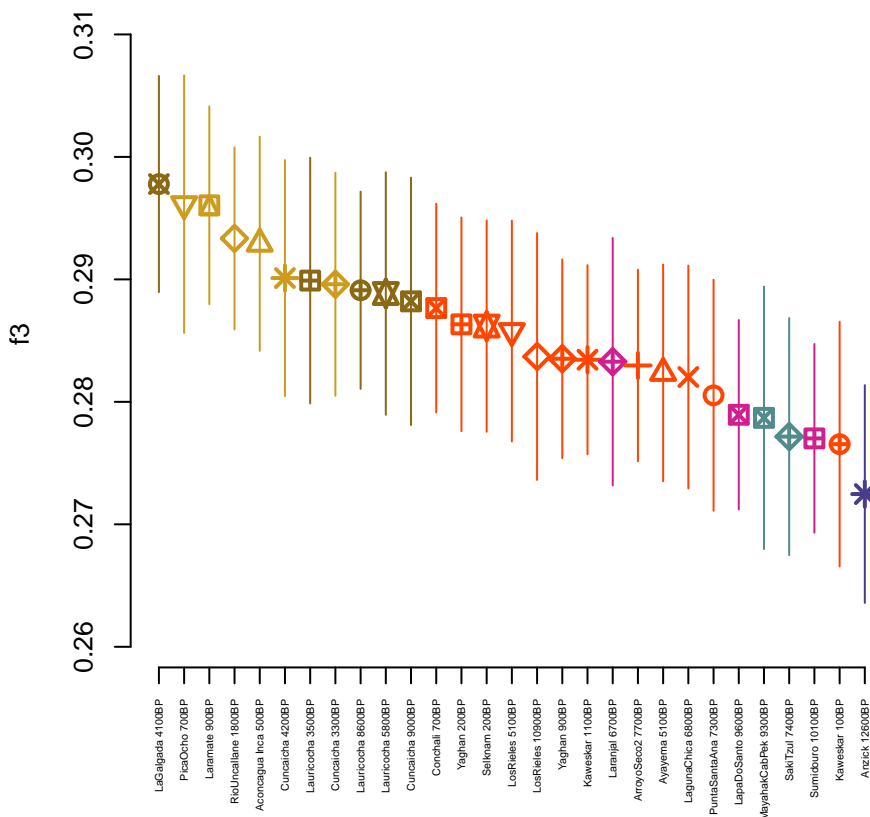**B.****f3(YRI; STF, Ancient)**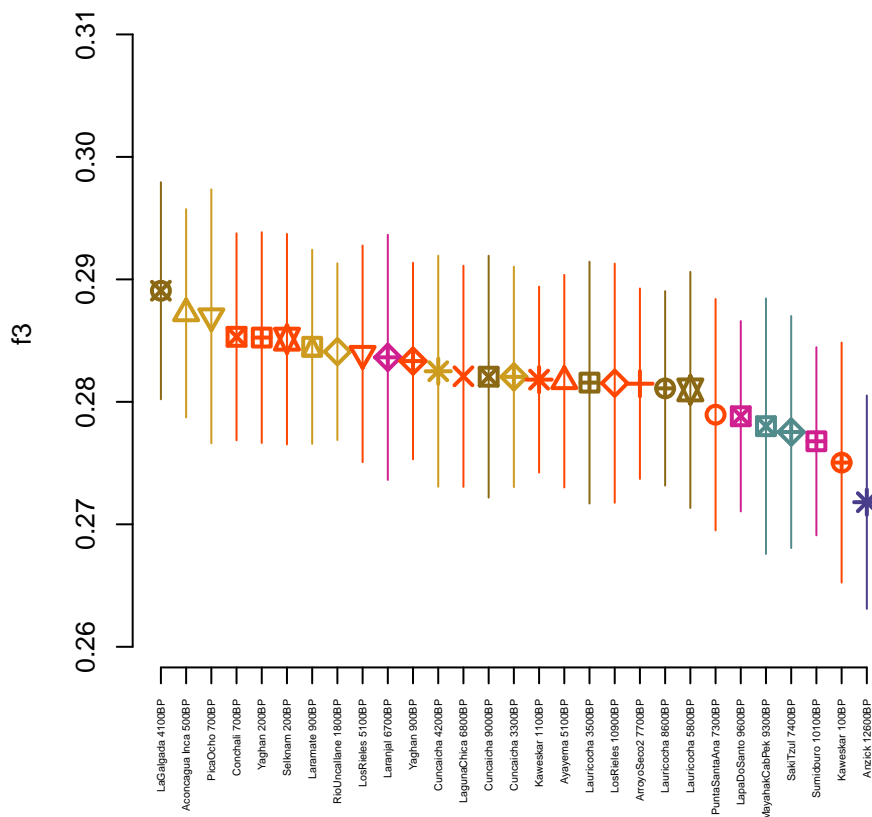**C.****f3(YRI; CCP, Ancient)**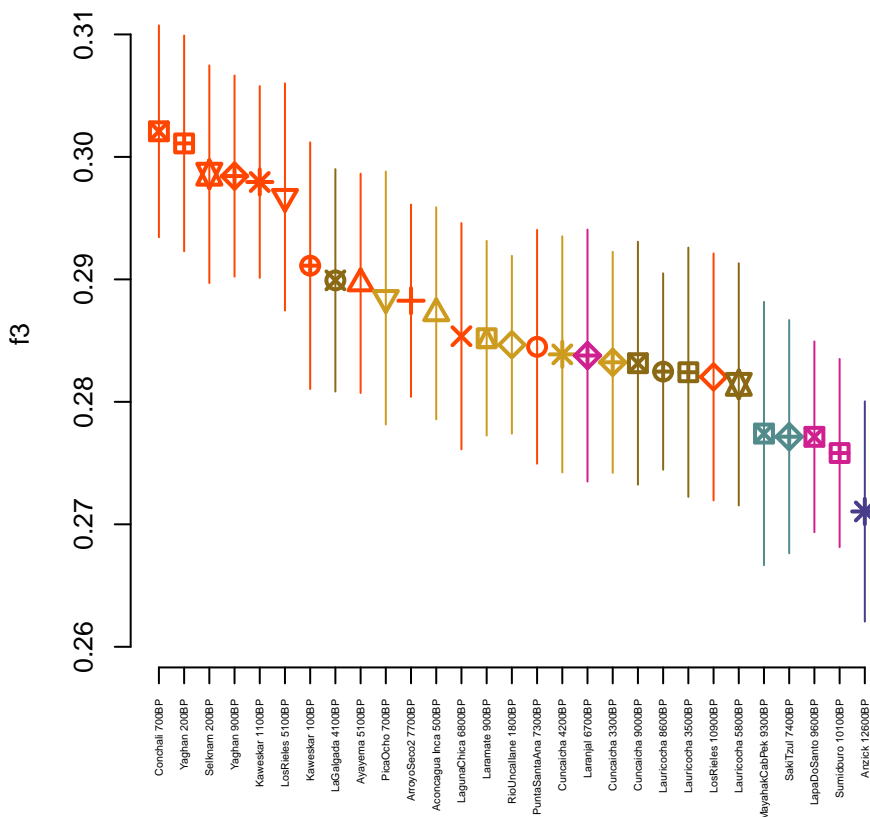**D.****f3(YRI; CWA, Ancient)**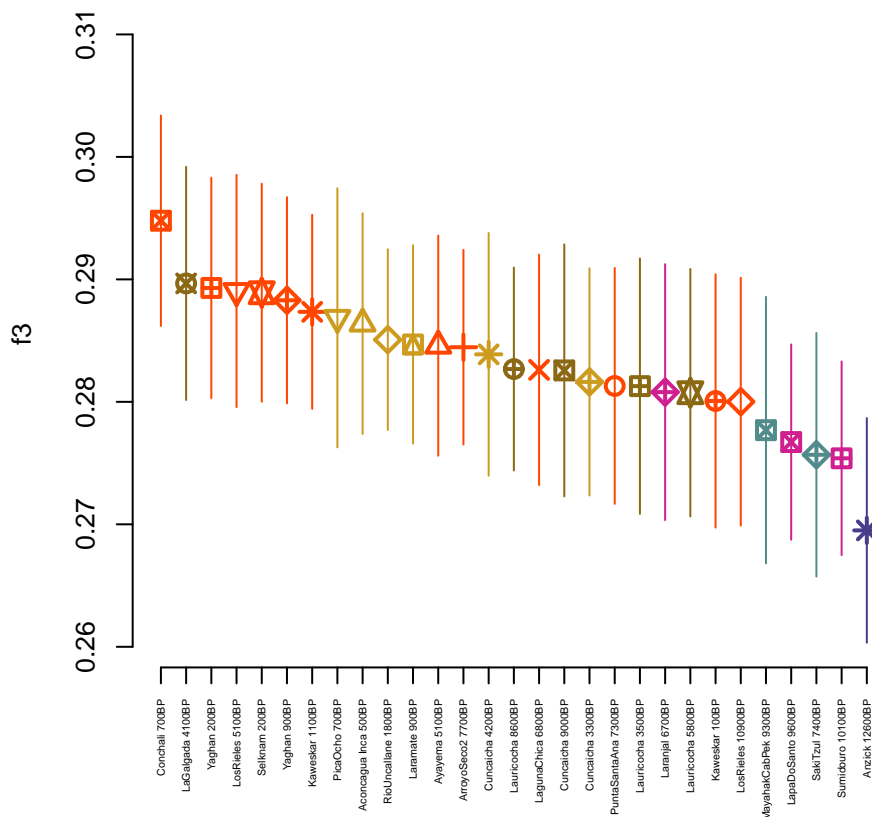

**E.** f4(YRI, CAN; Ancient Beringia, Ancient)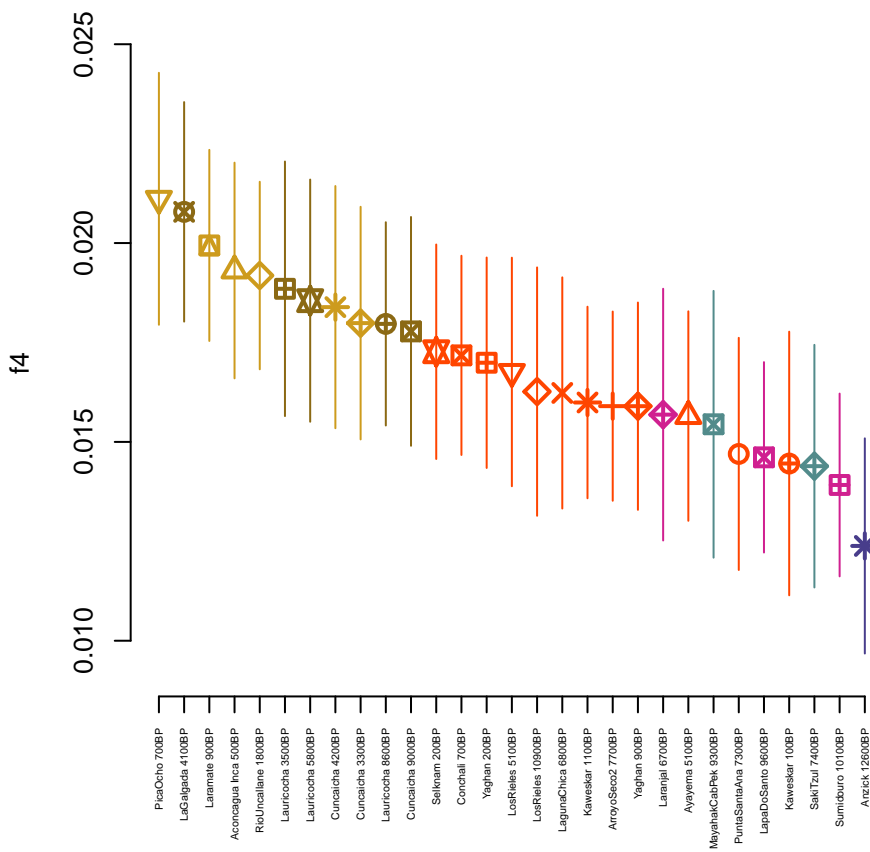**F.** f4(YRI, STF; Ancient Beringia, Ancient)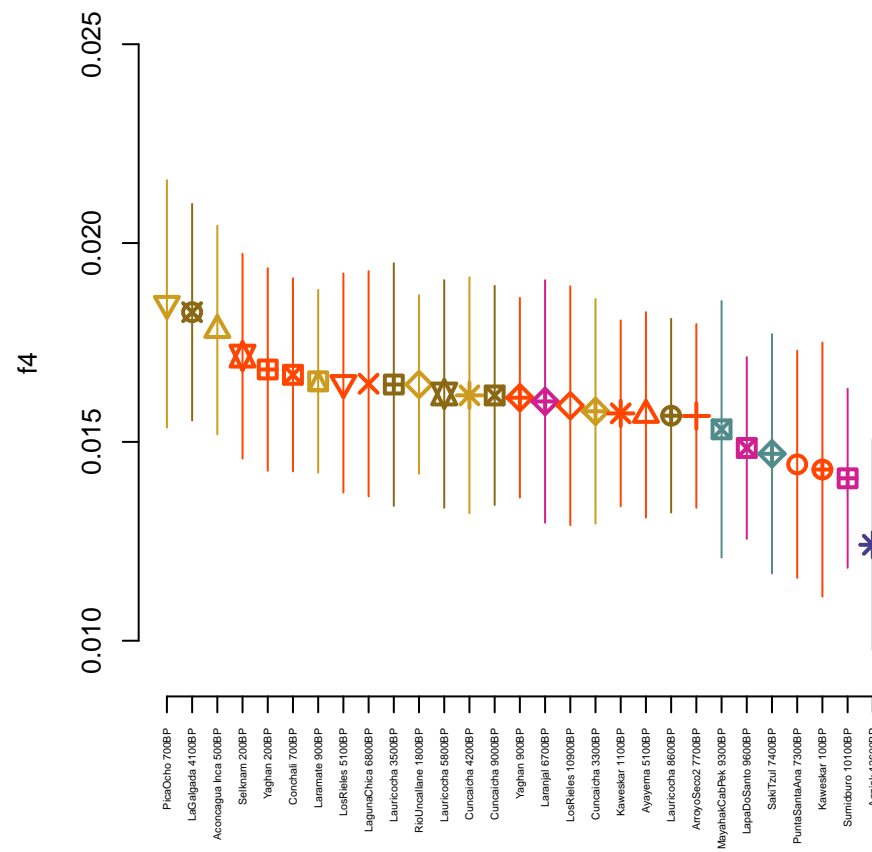**G.** f4(YRI, CCP; Ancient Beringia, Ancient)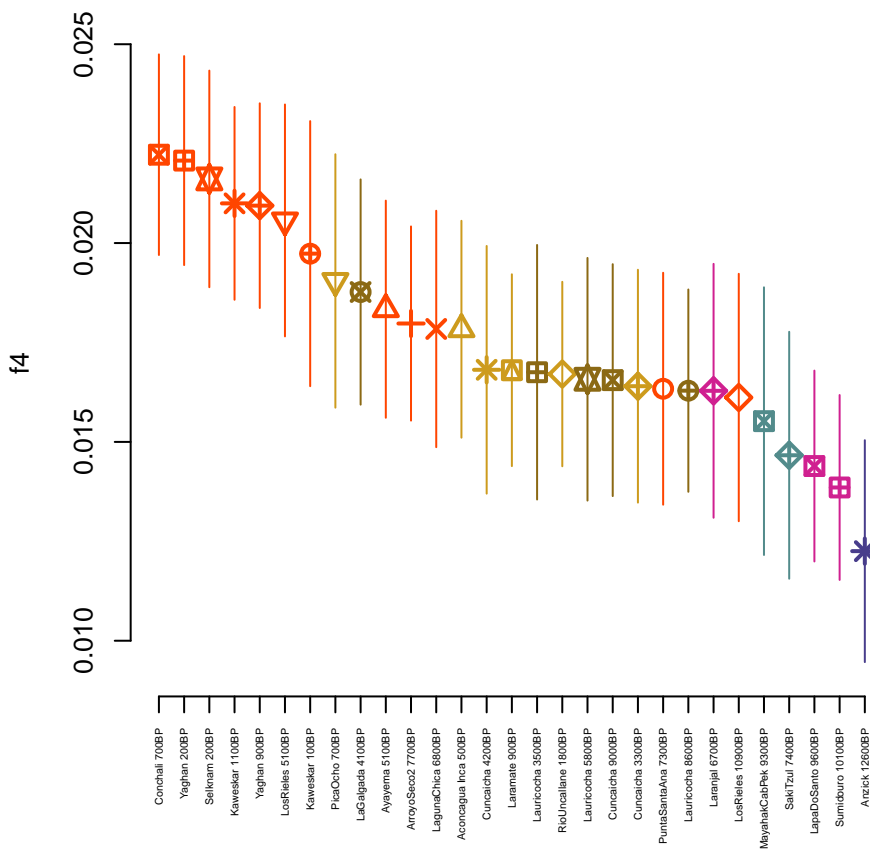**H.** f4(YRI, CWA; Ancient Beringia, Ancient)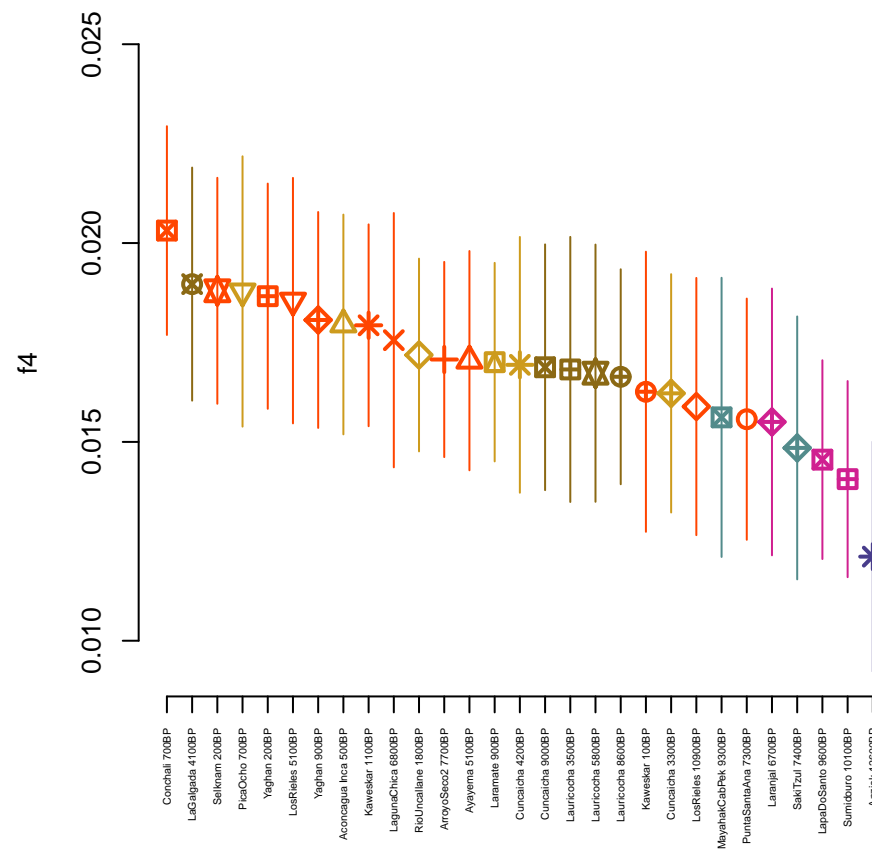

Supplement: pone.0233808.s019.pdf [file pone.0233808.s019.pdf]
