# Supplementary material for: Fine-scale genomic analyses of admixed individuals reveal unrecognized genetic ancestry components in Argentina
Source: PubMed Central journal article supplement (PMC7365470; doi:10.1371/journal.pone.0233808), 2020-07-16

A.

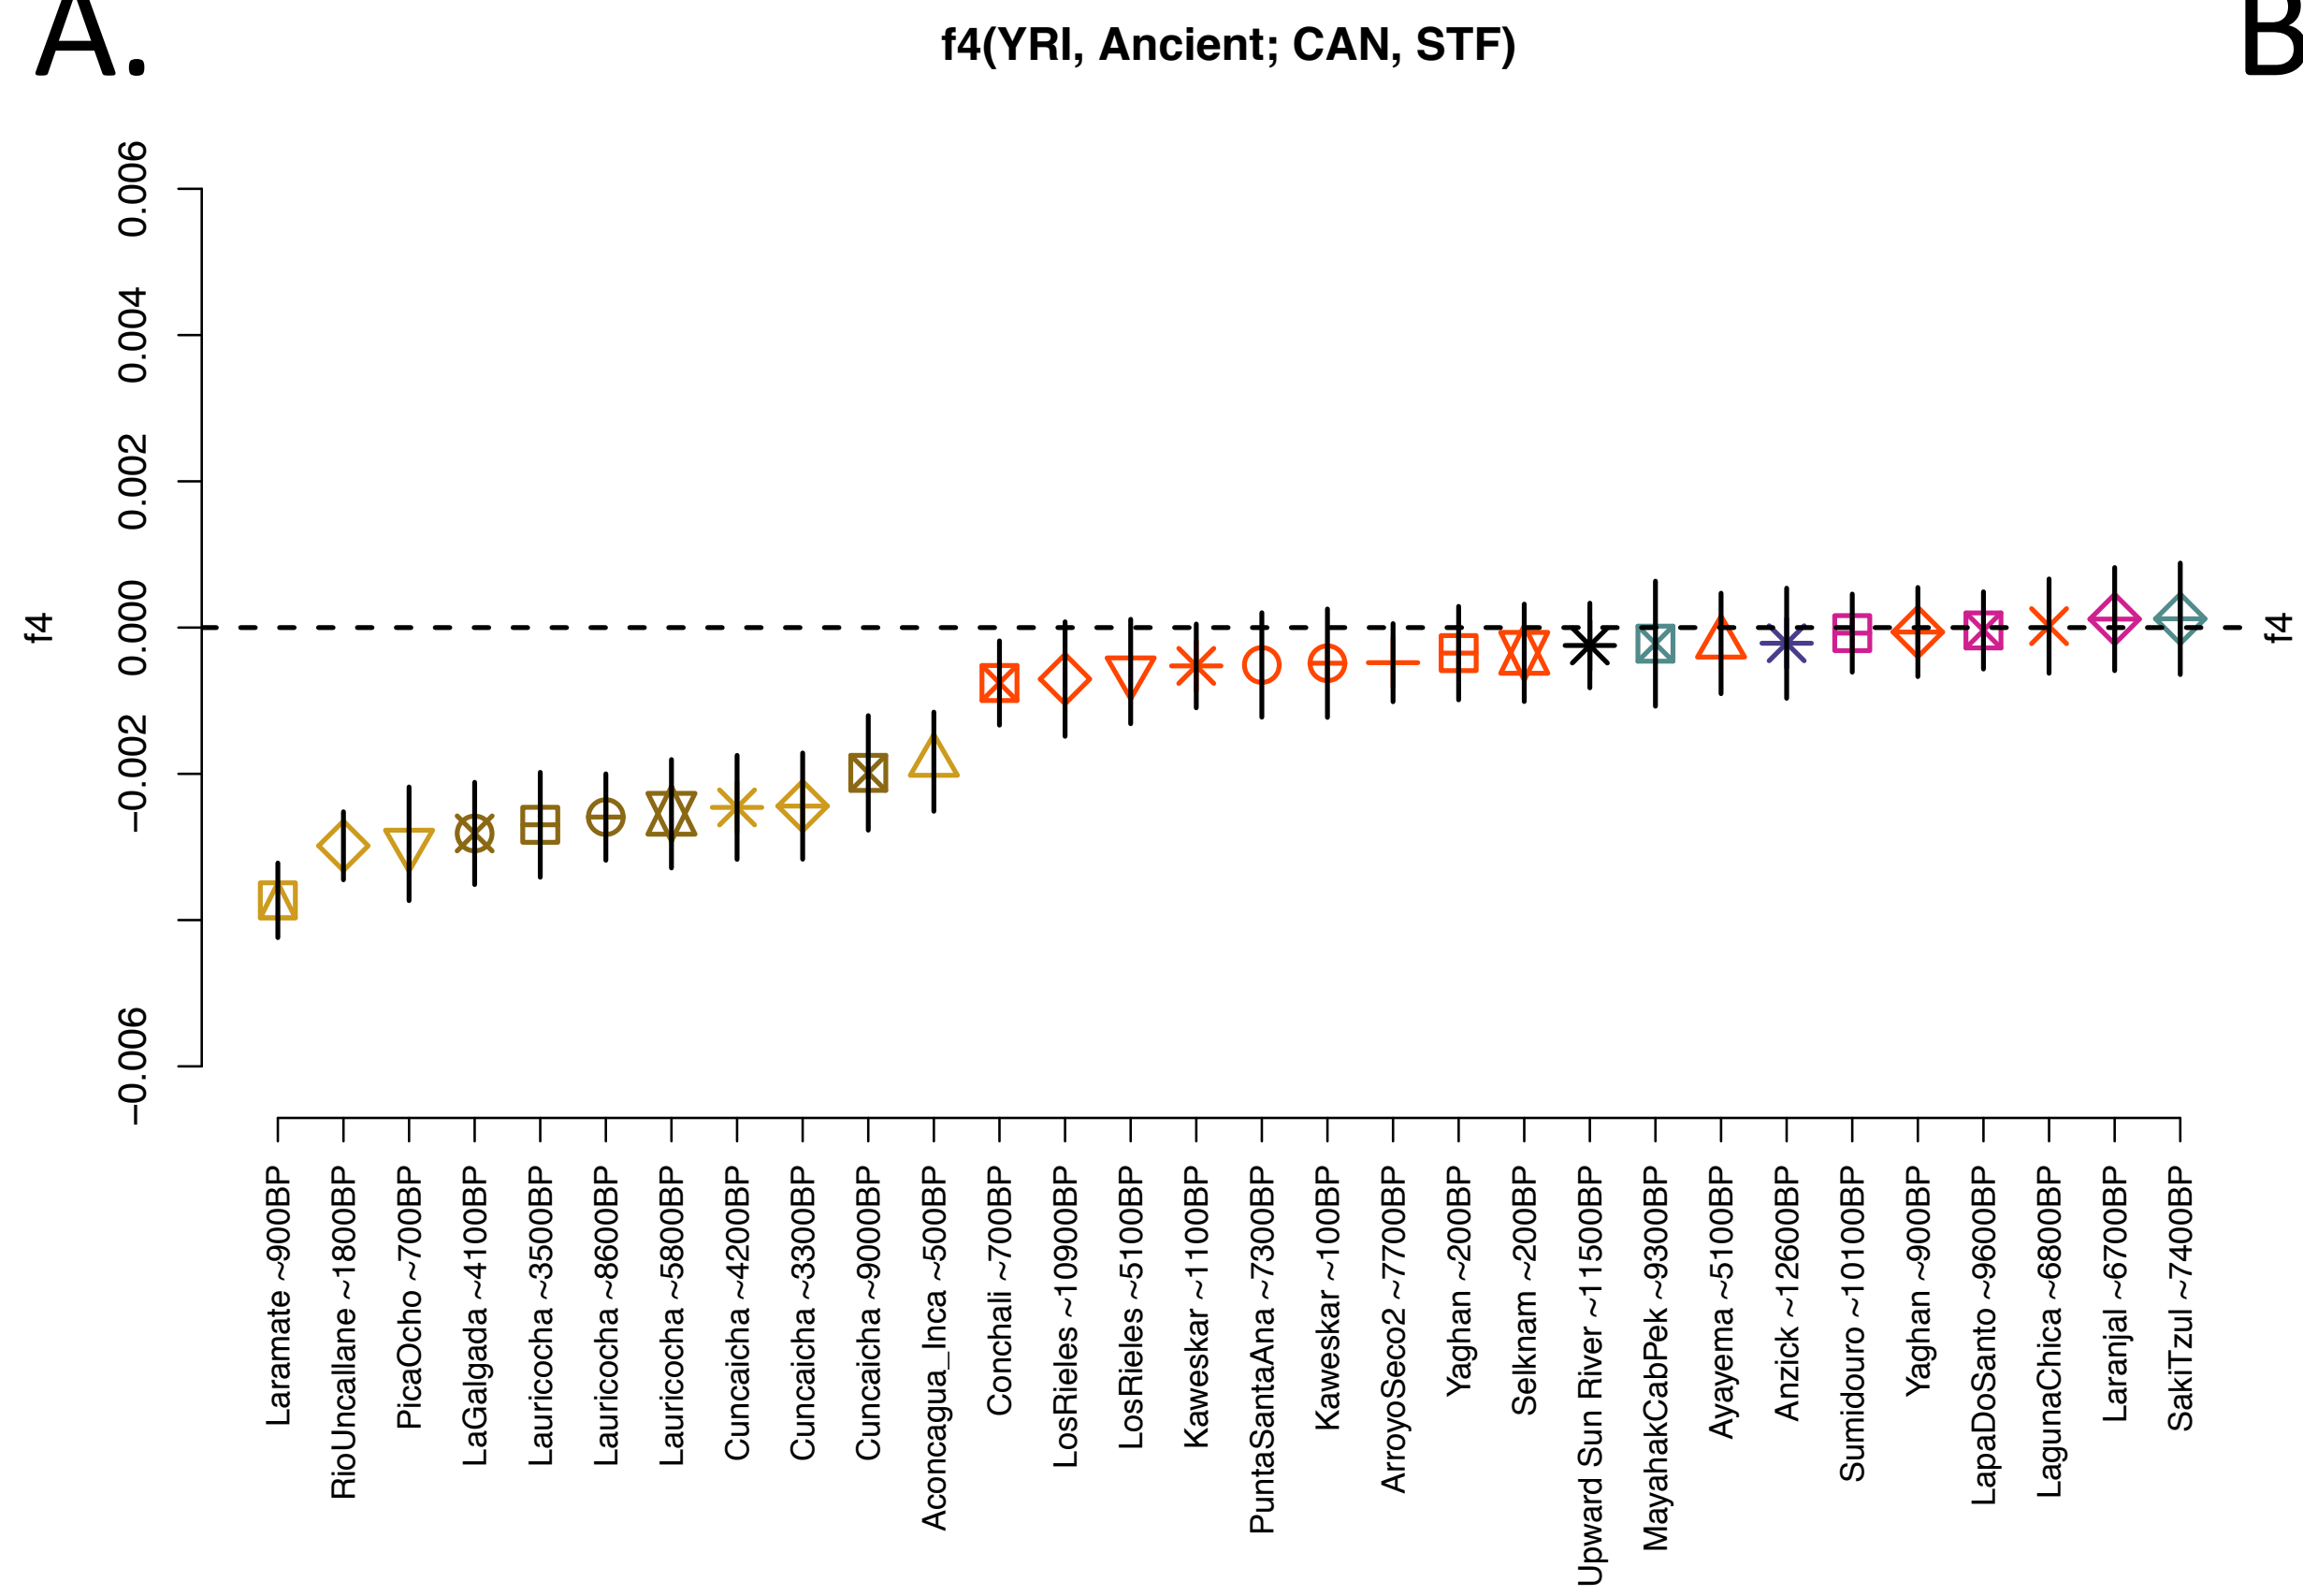

B.

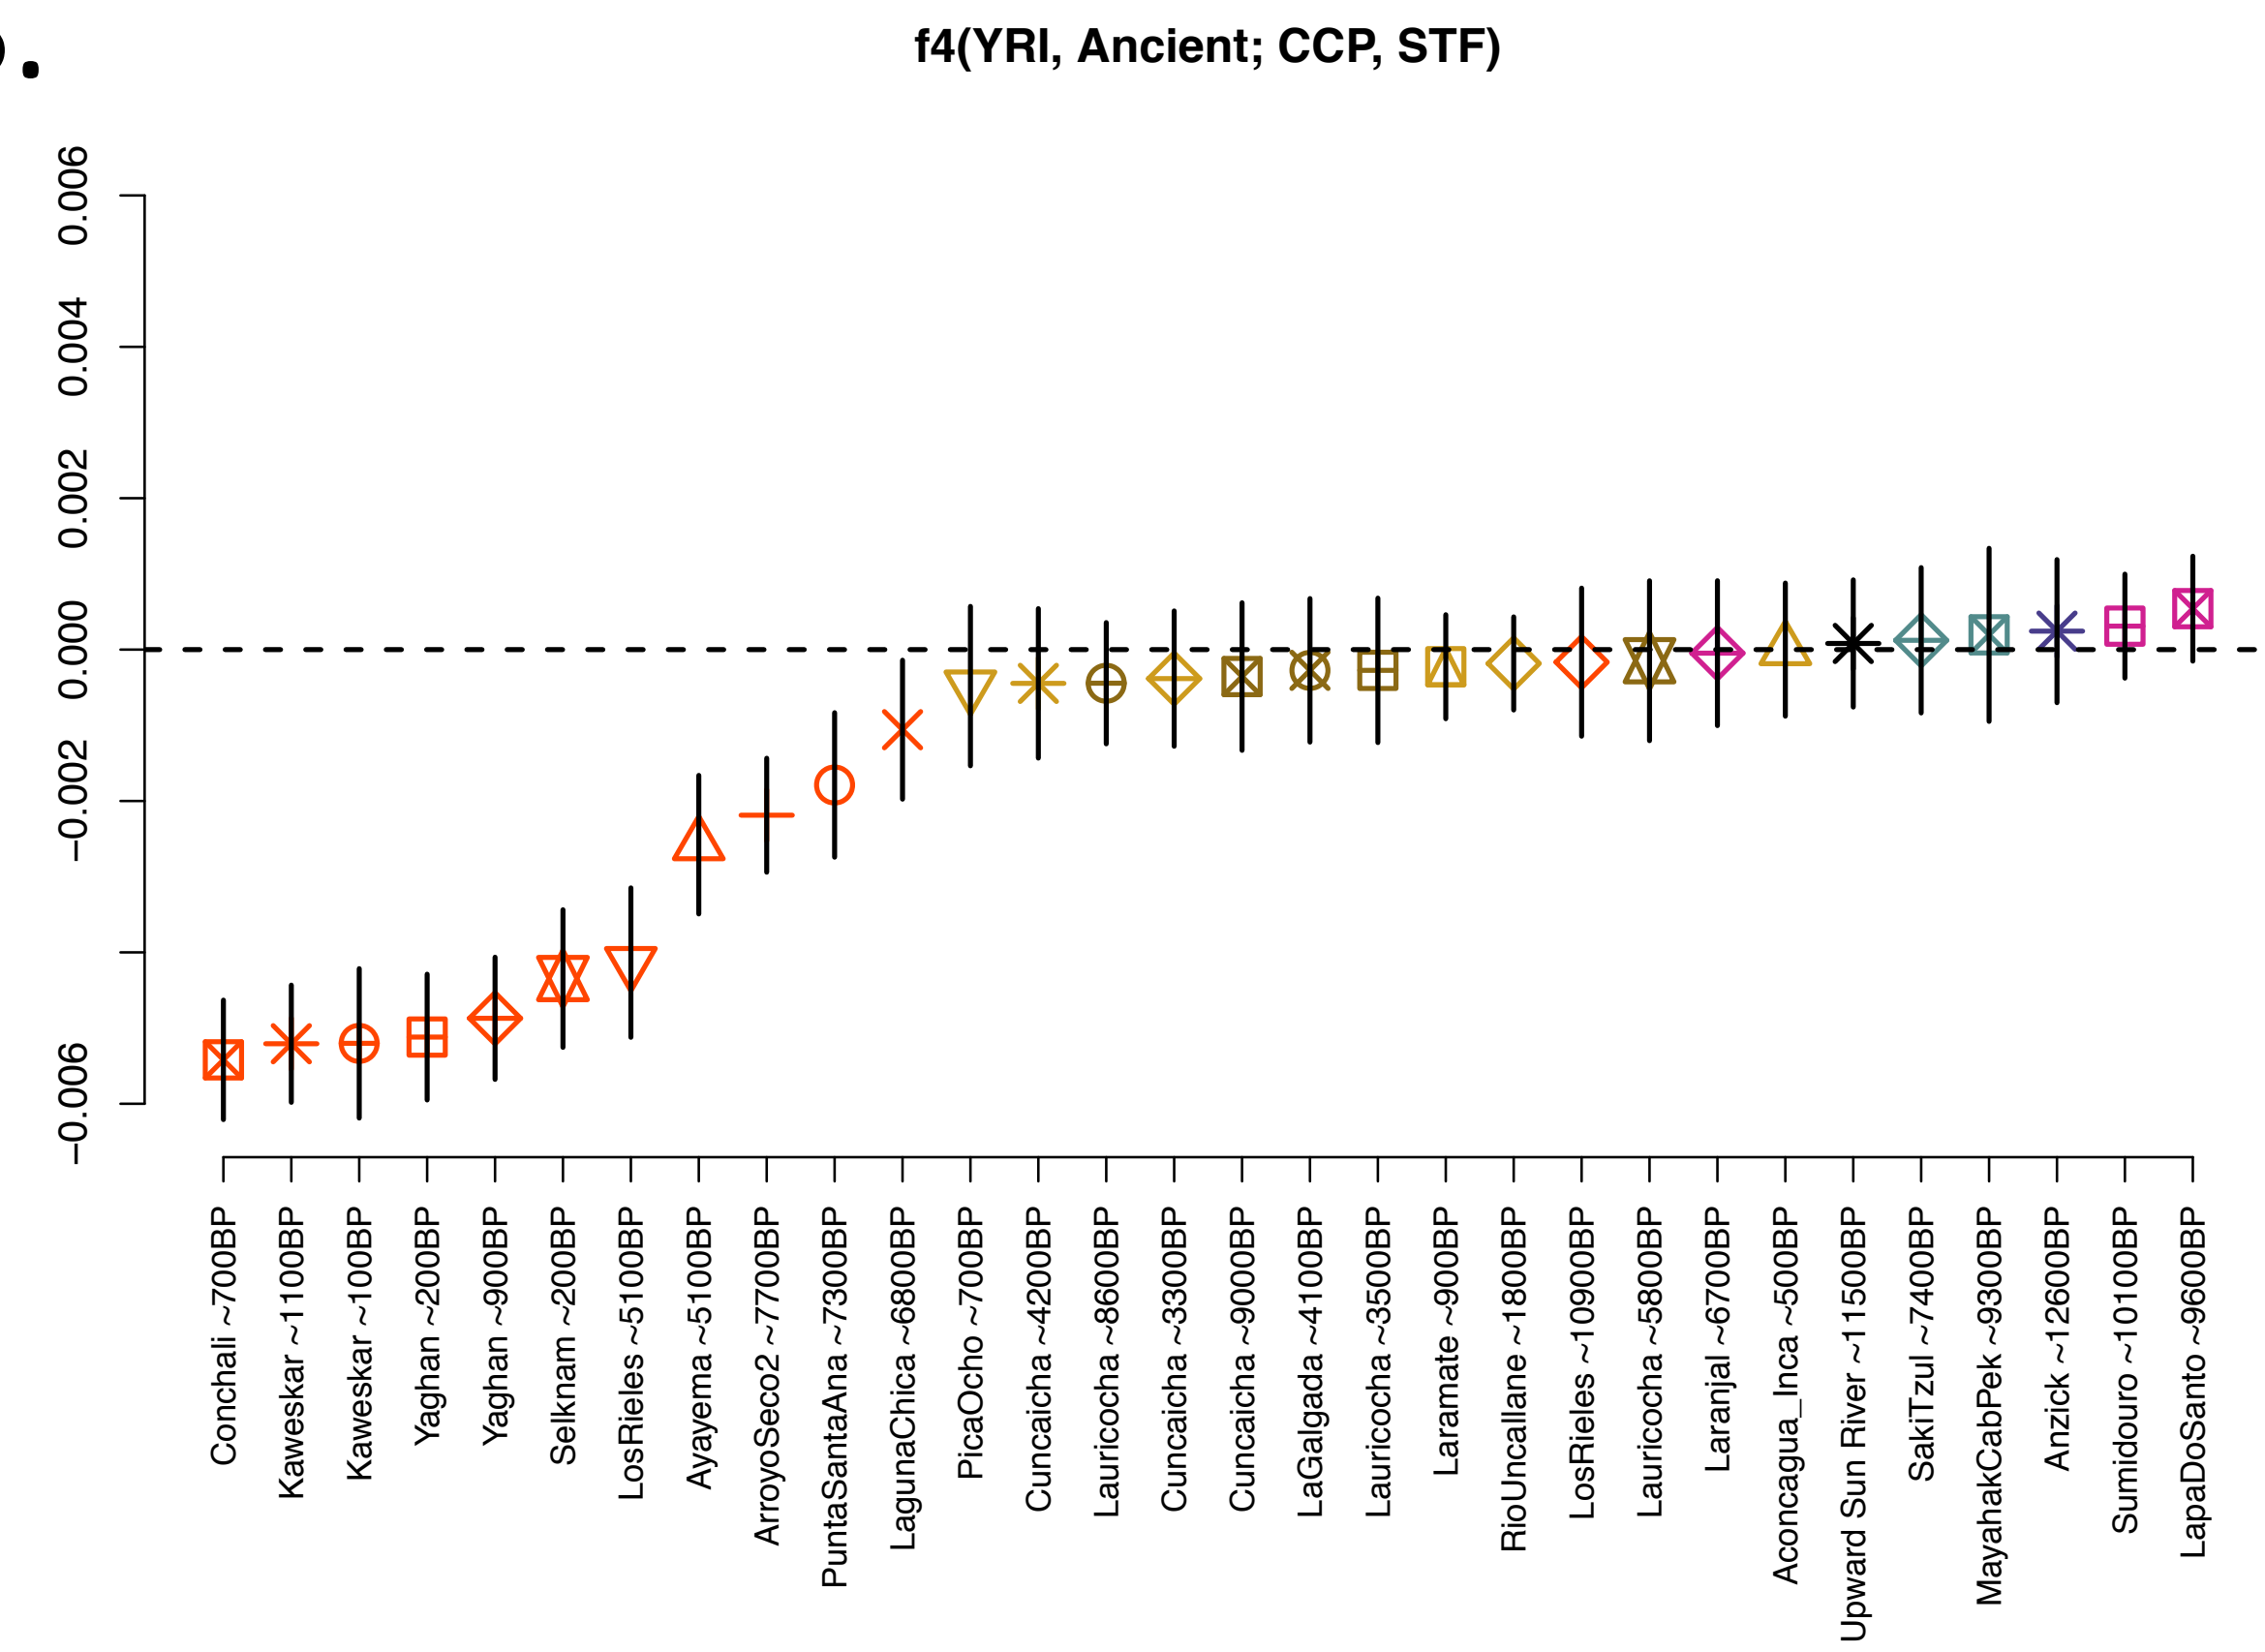

C.

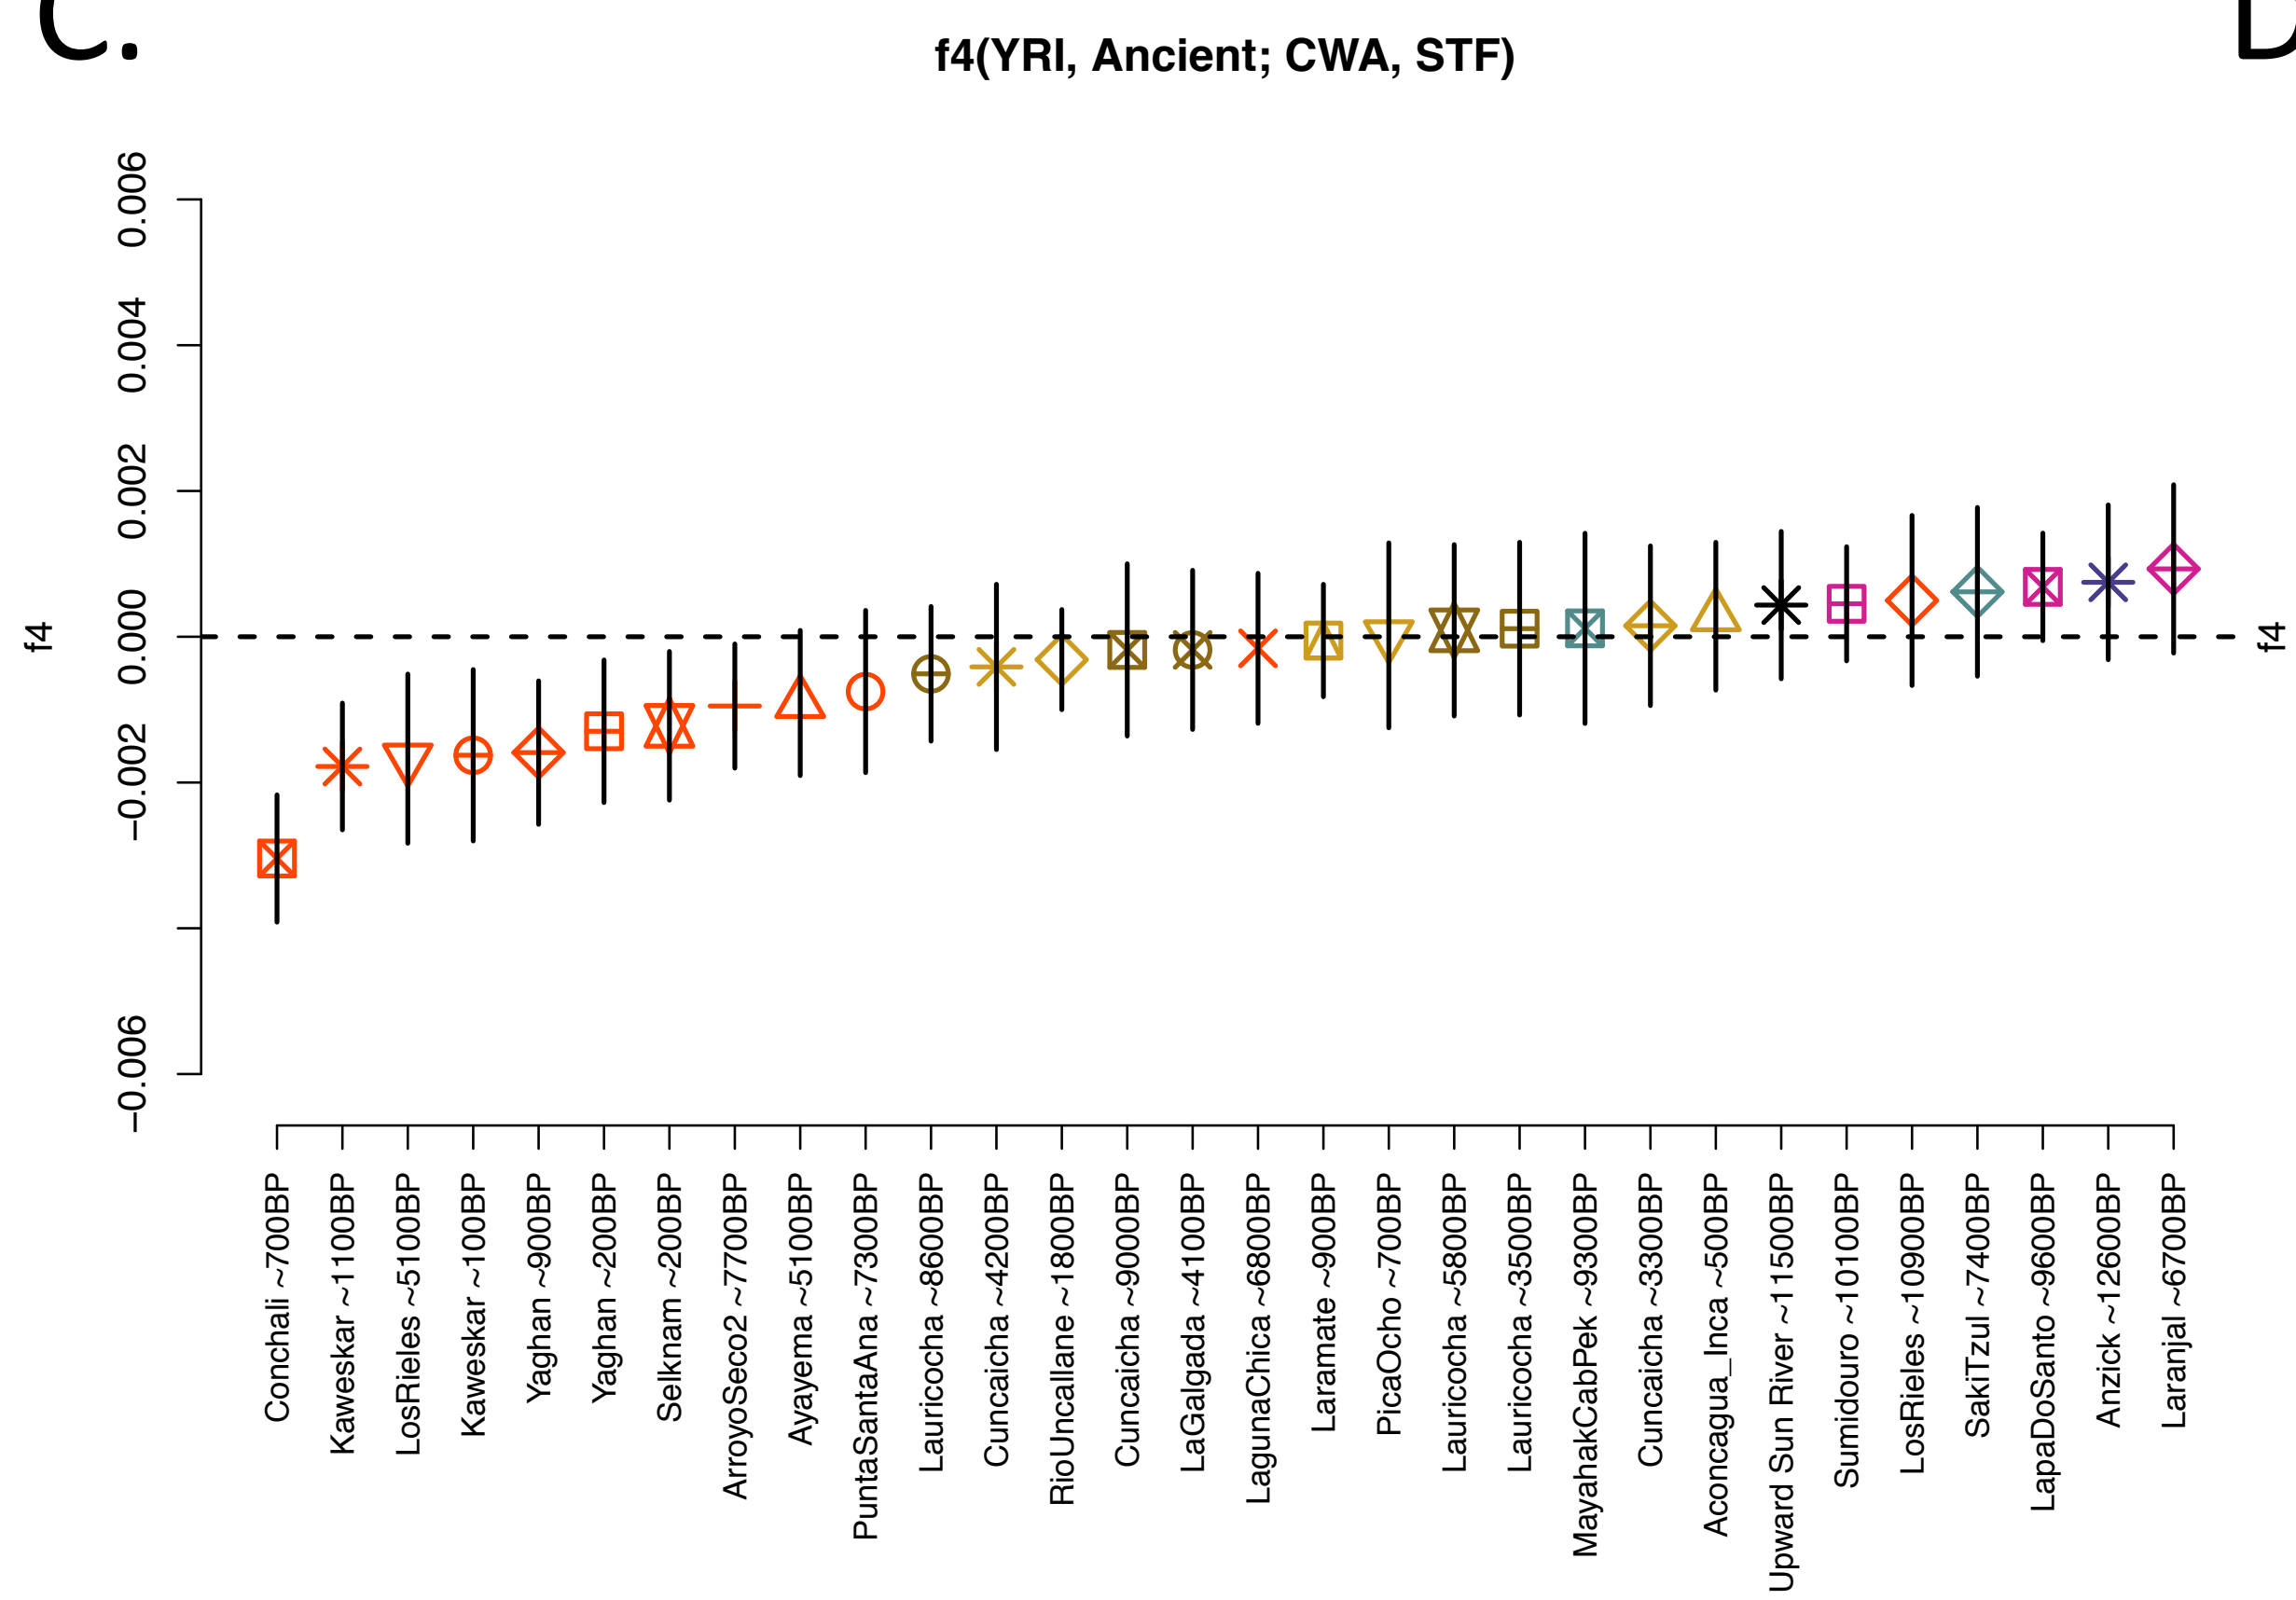

D.

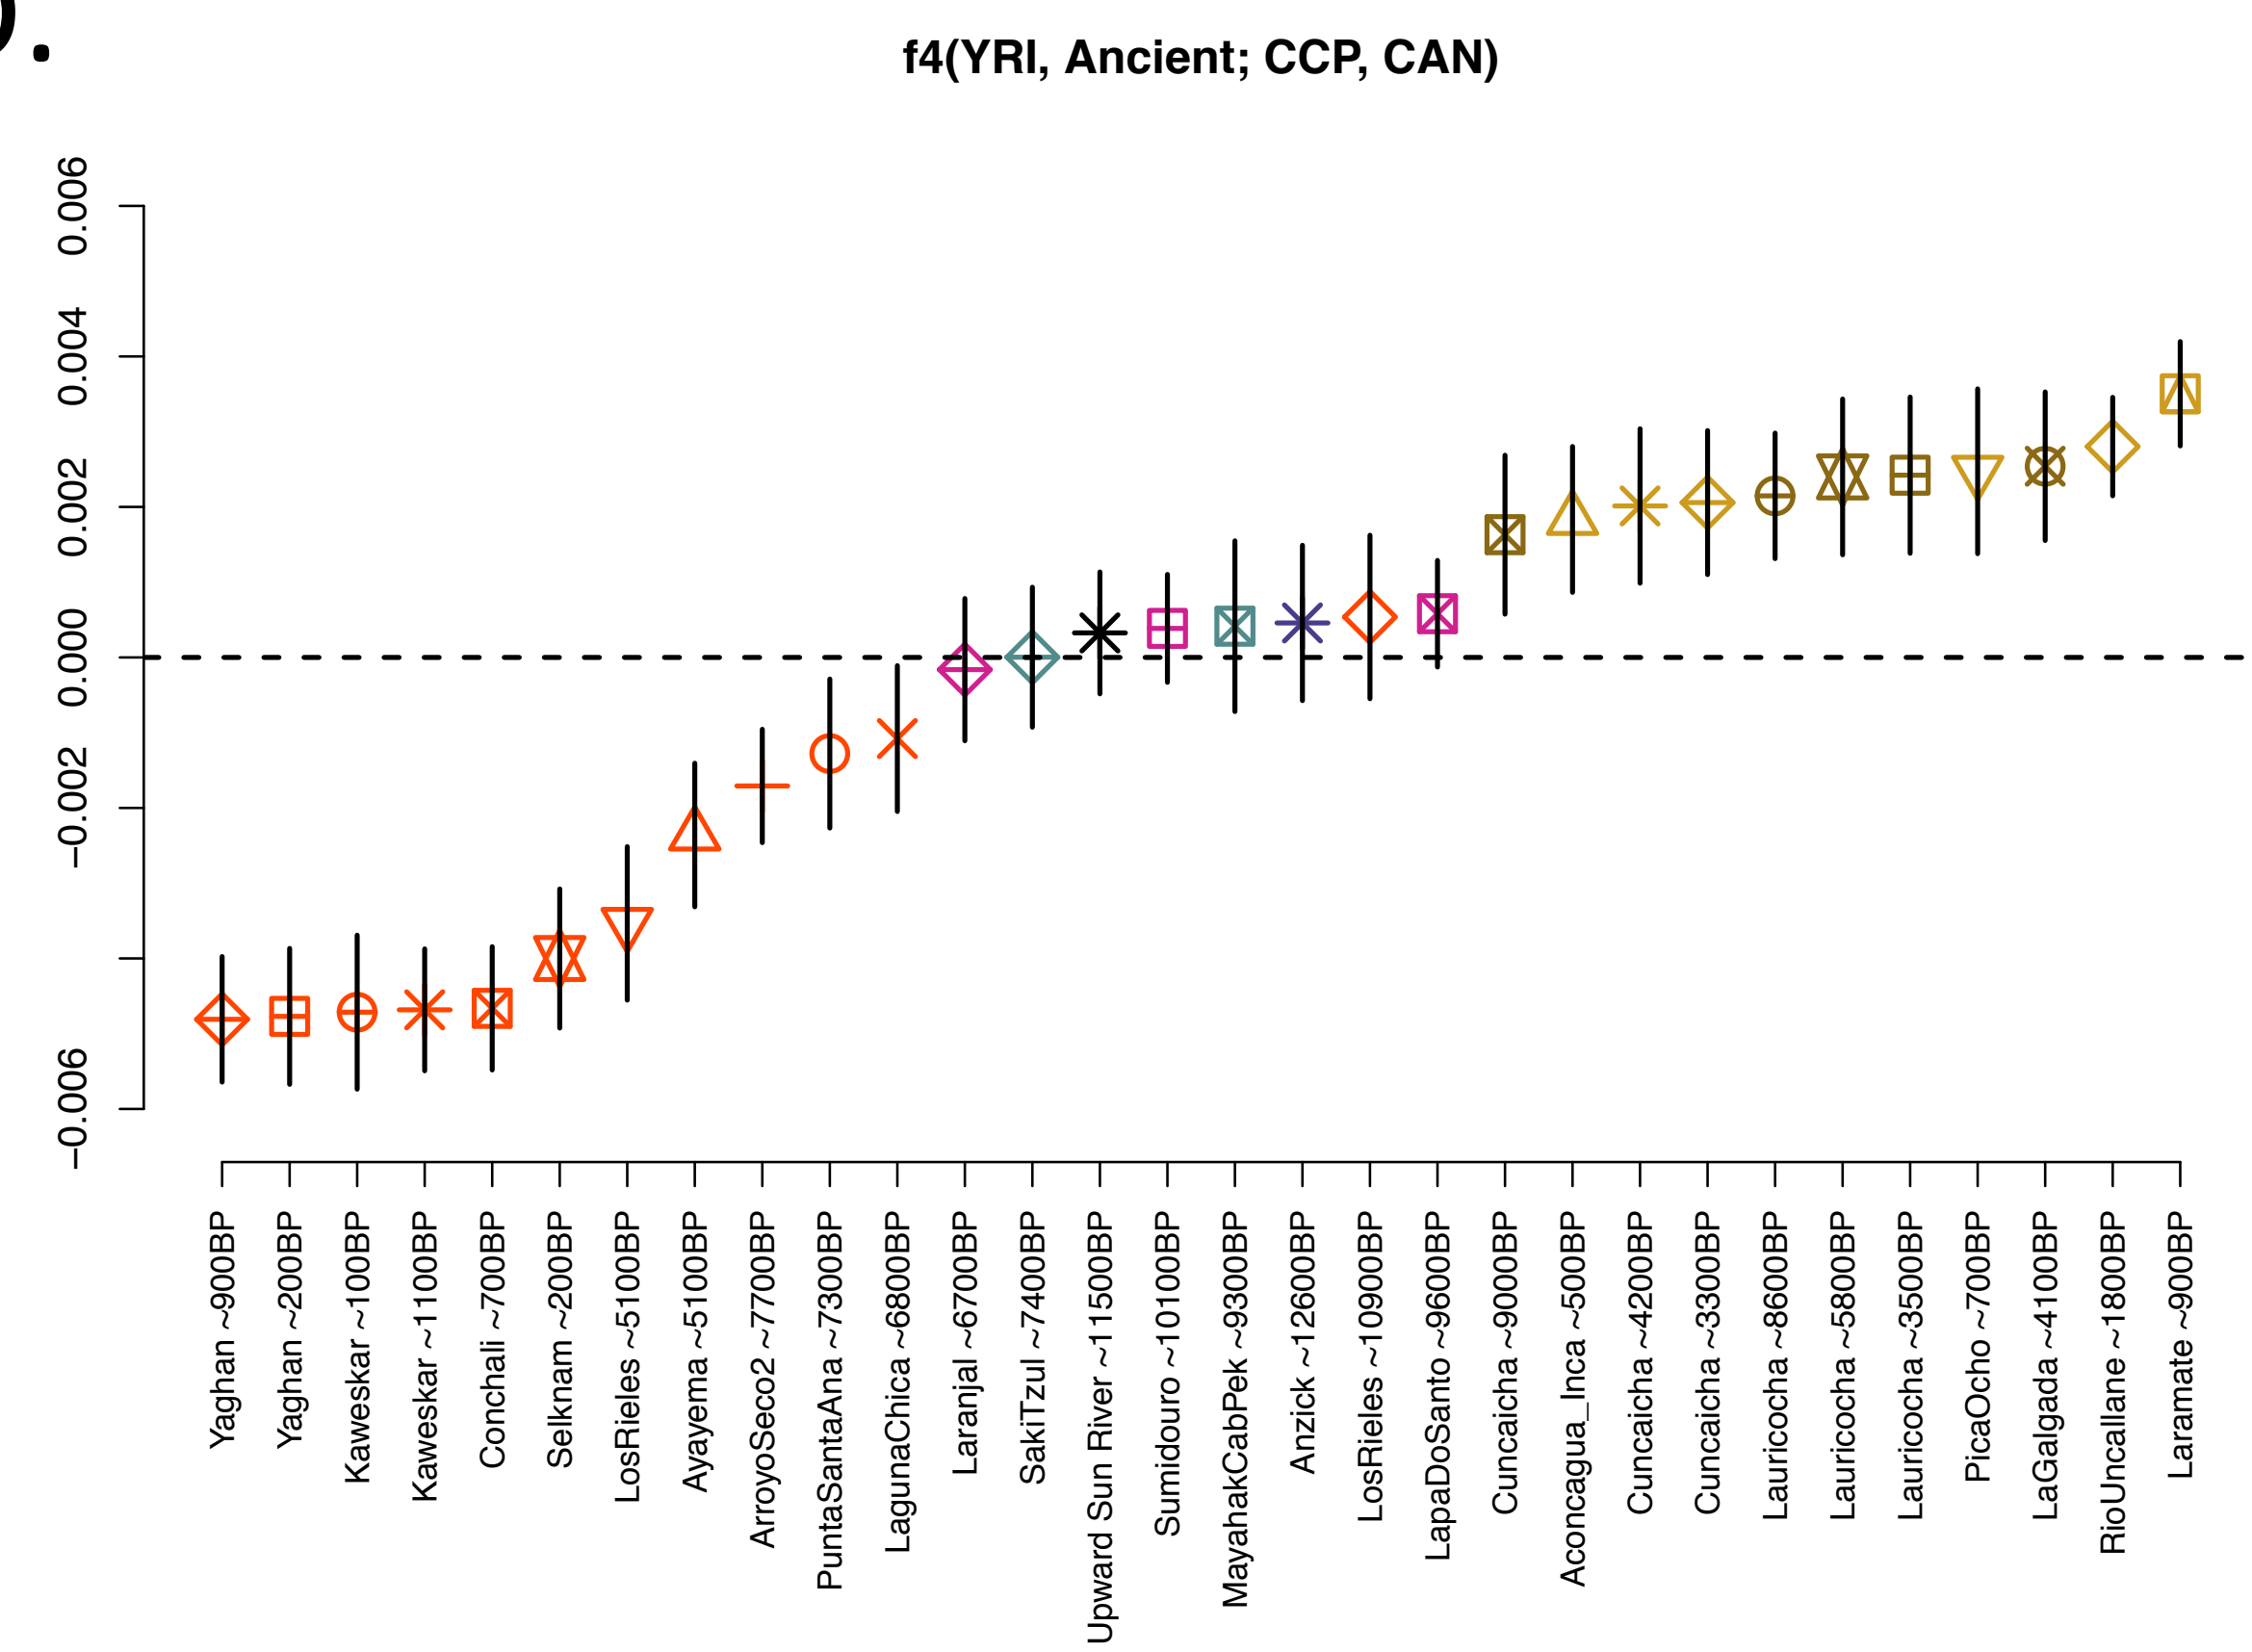

E.

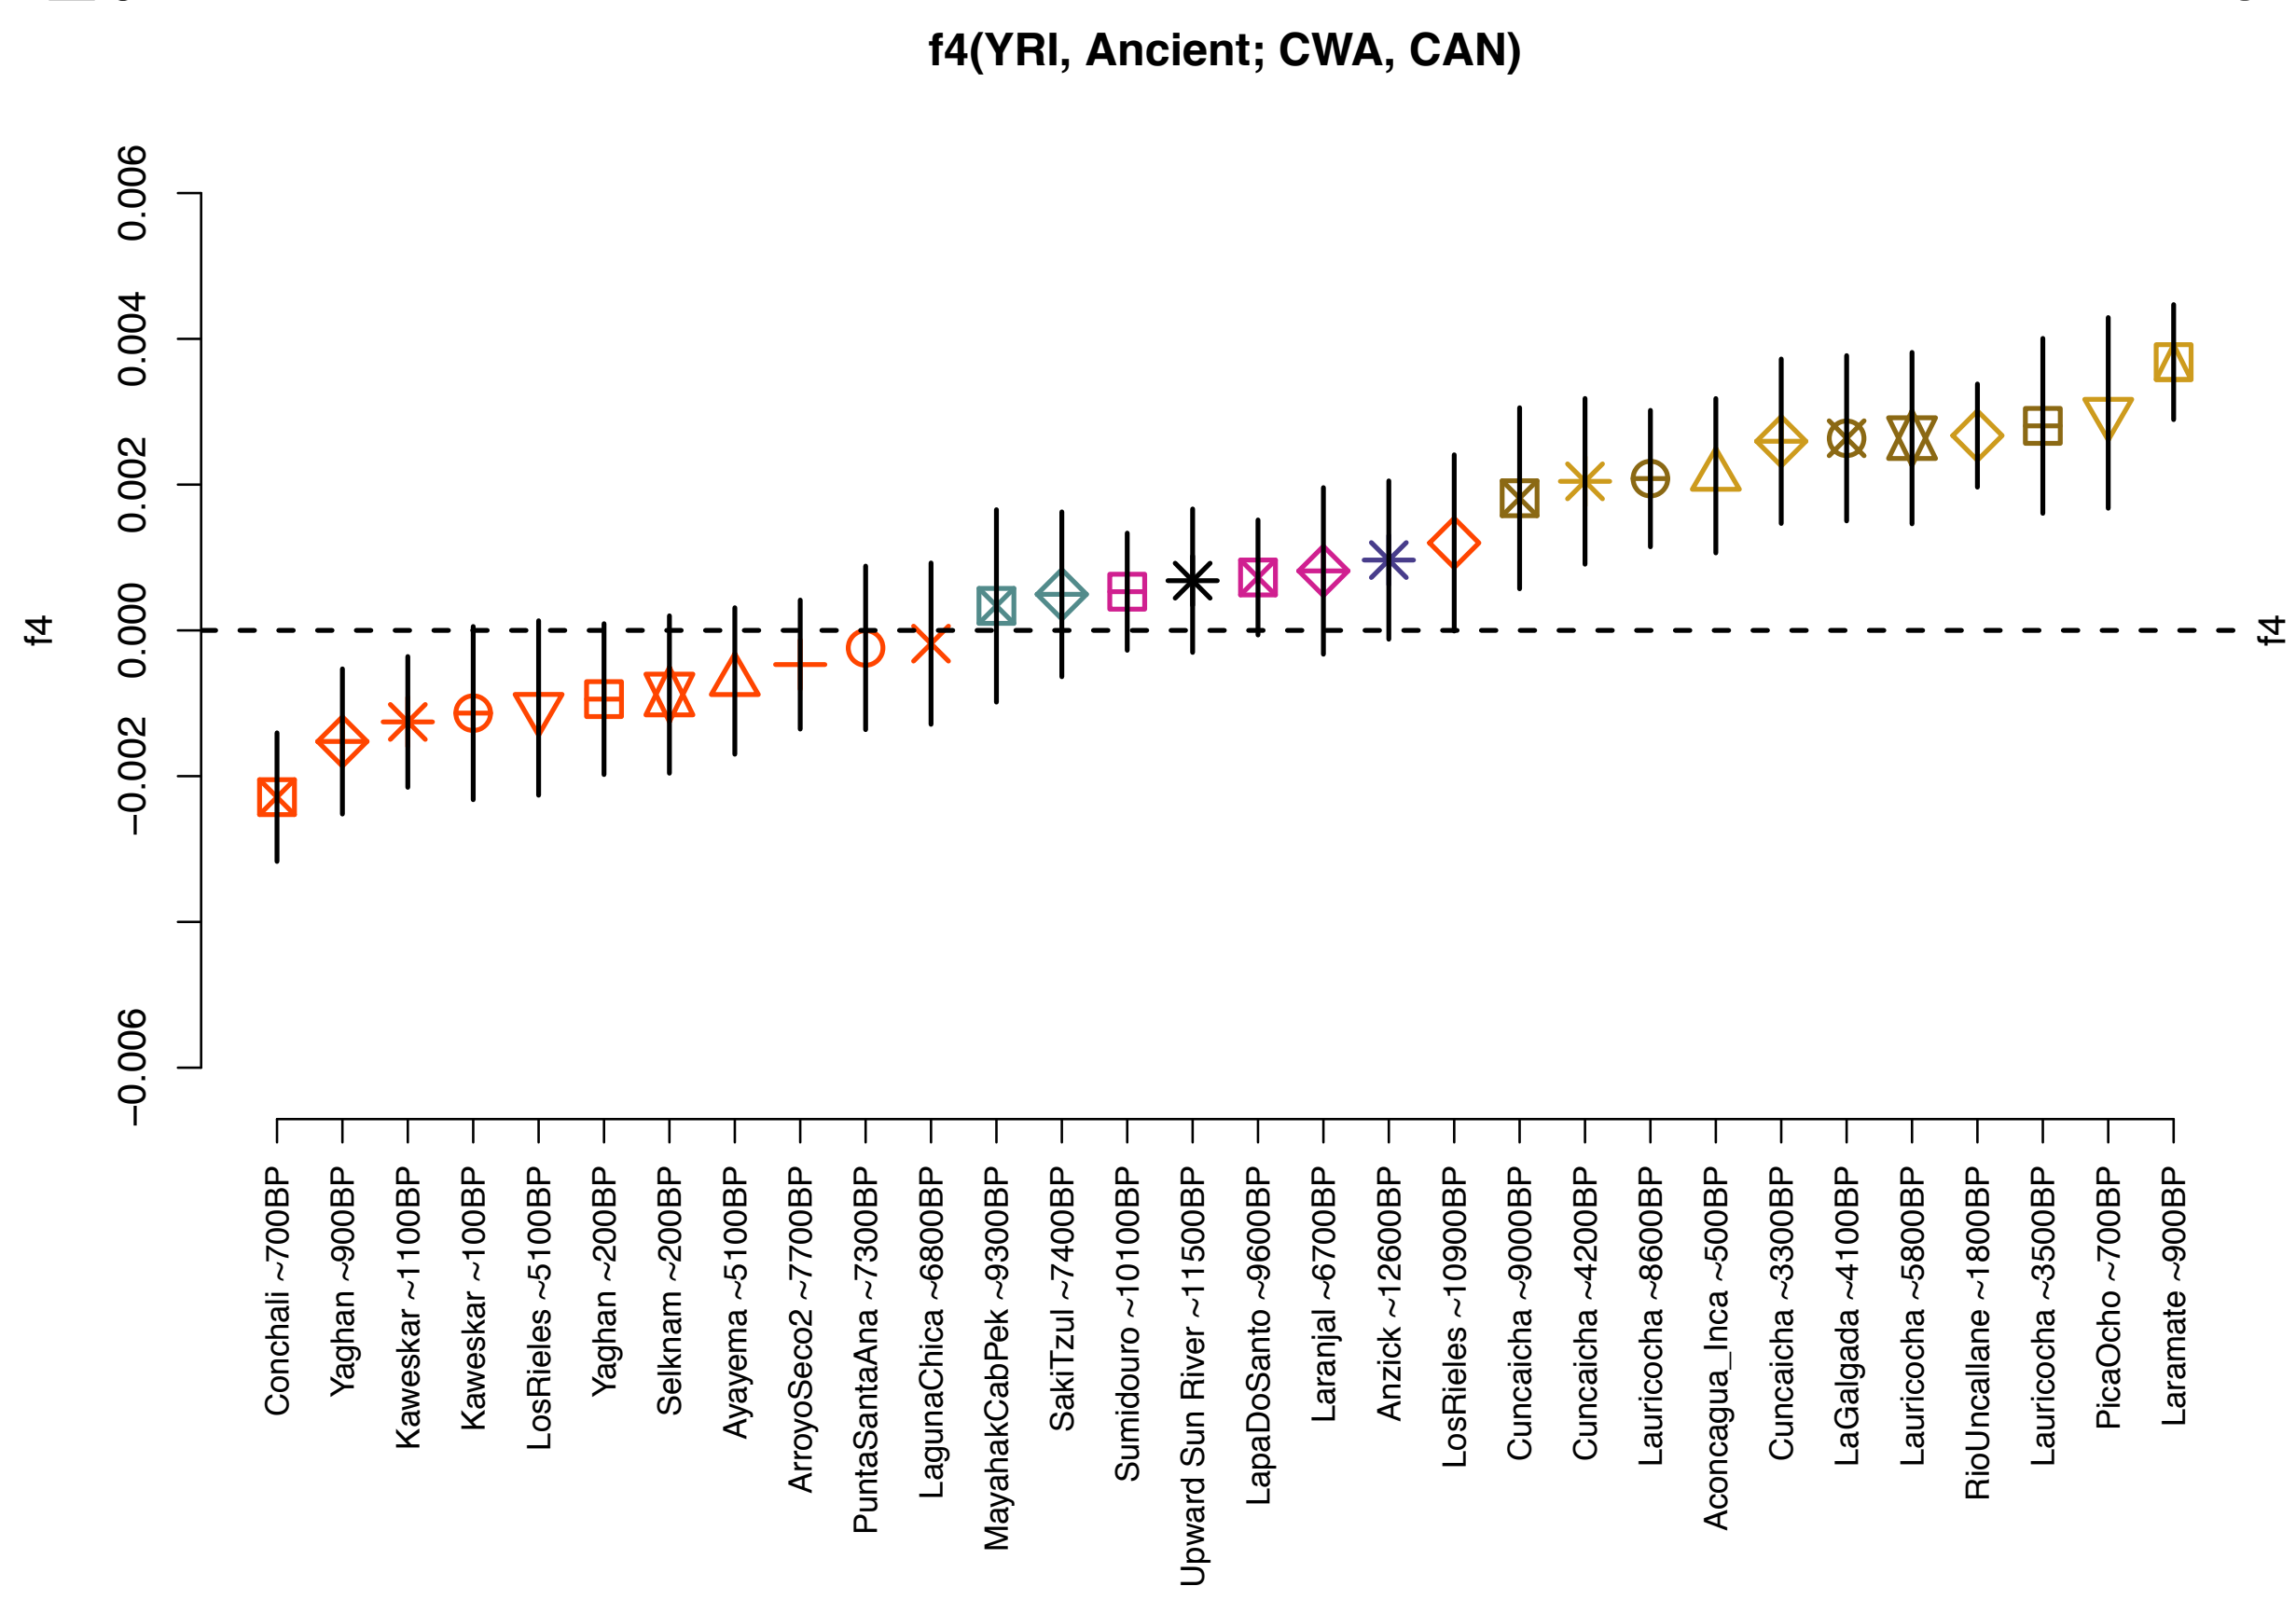

F.

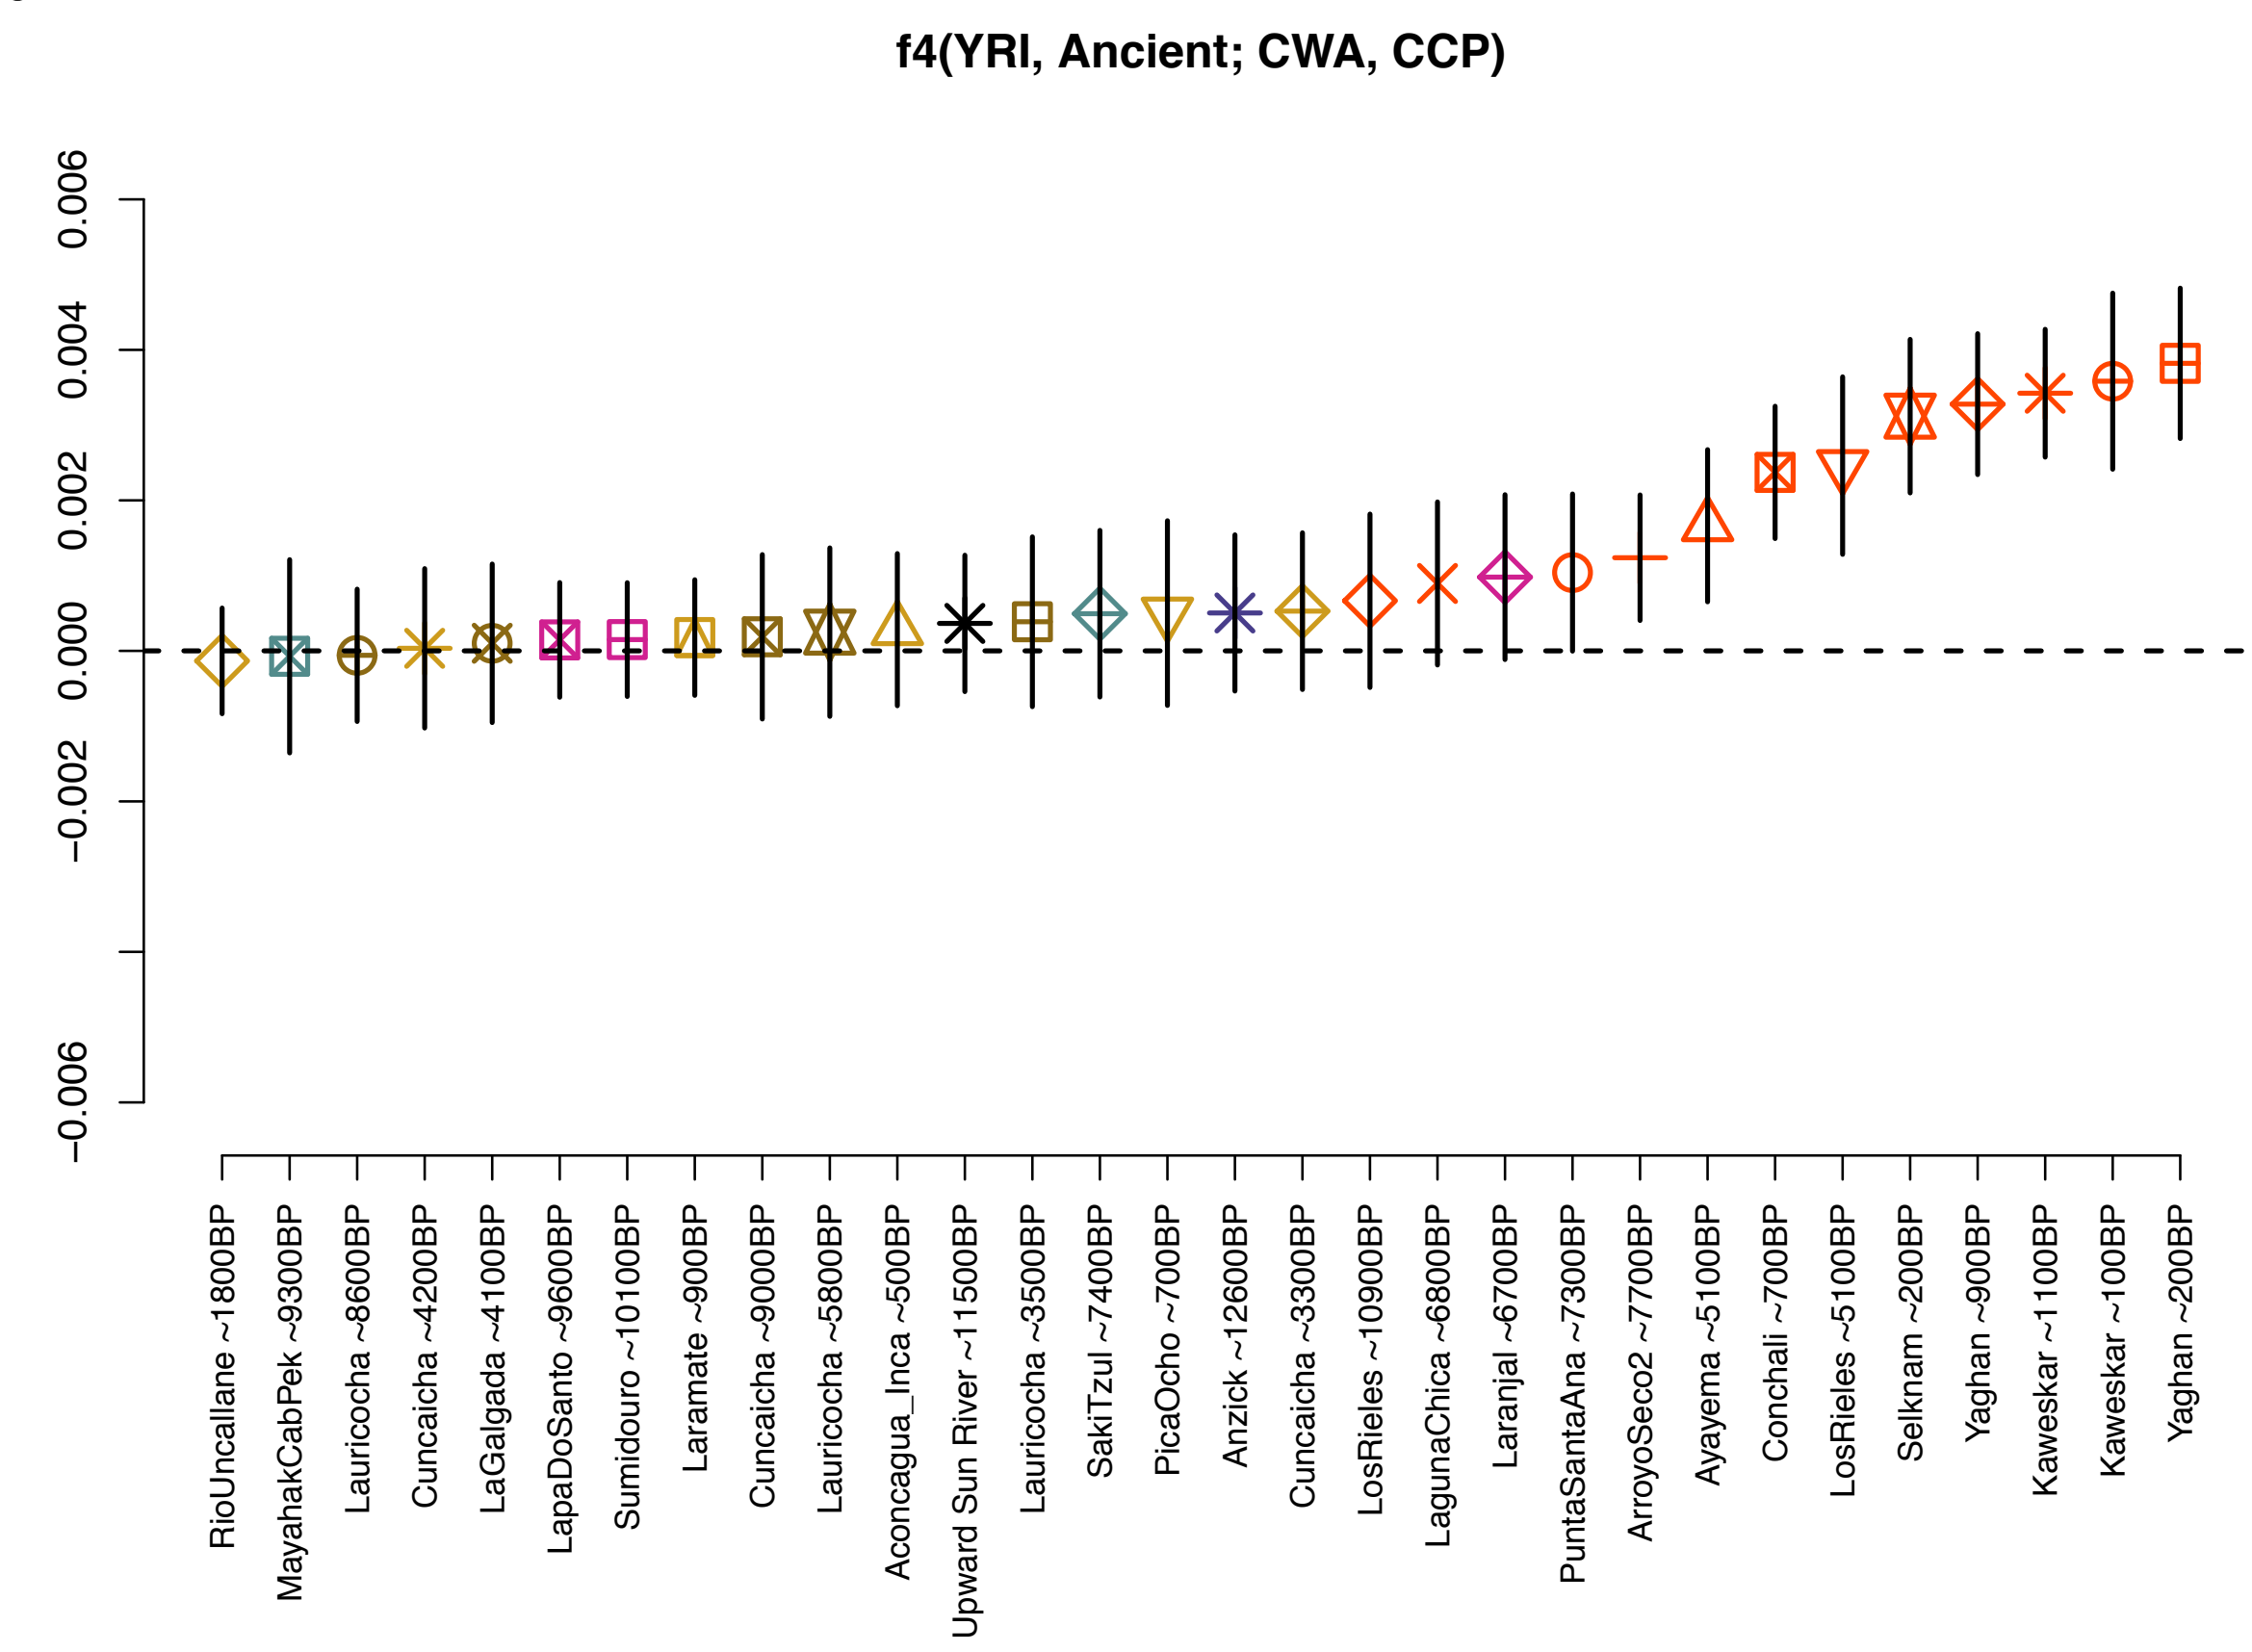

Supplement: pone.0233808.s021.pdf [file pone.0233808.s021.pdf]
