# Supplementary material for: Fine-scale genomic analyses of admixed individuals reveal unrecognized genetic ancestry components in Argentina
Source: PubMed Central journal article supplement (PMC7365470; doi:10.1371/journal.pone.0233808), 2020-07-16

**A.****f3 for Treeness:  $f_3(\text{Target}; S_1, S_2)$** 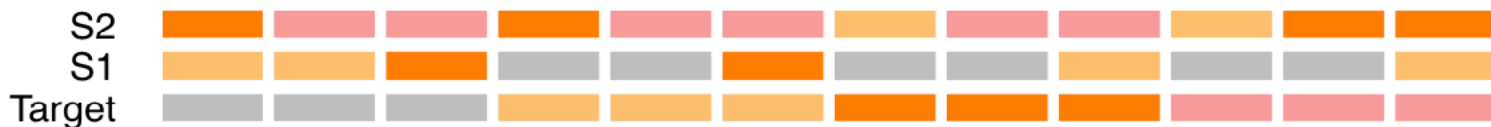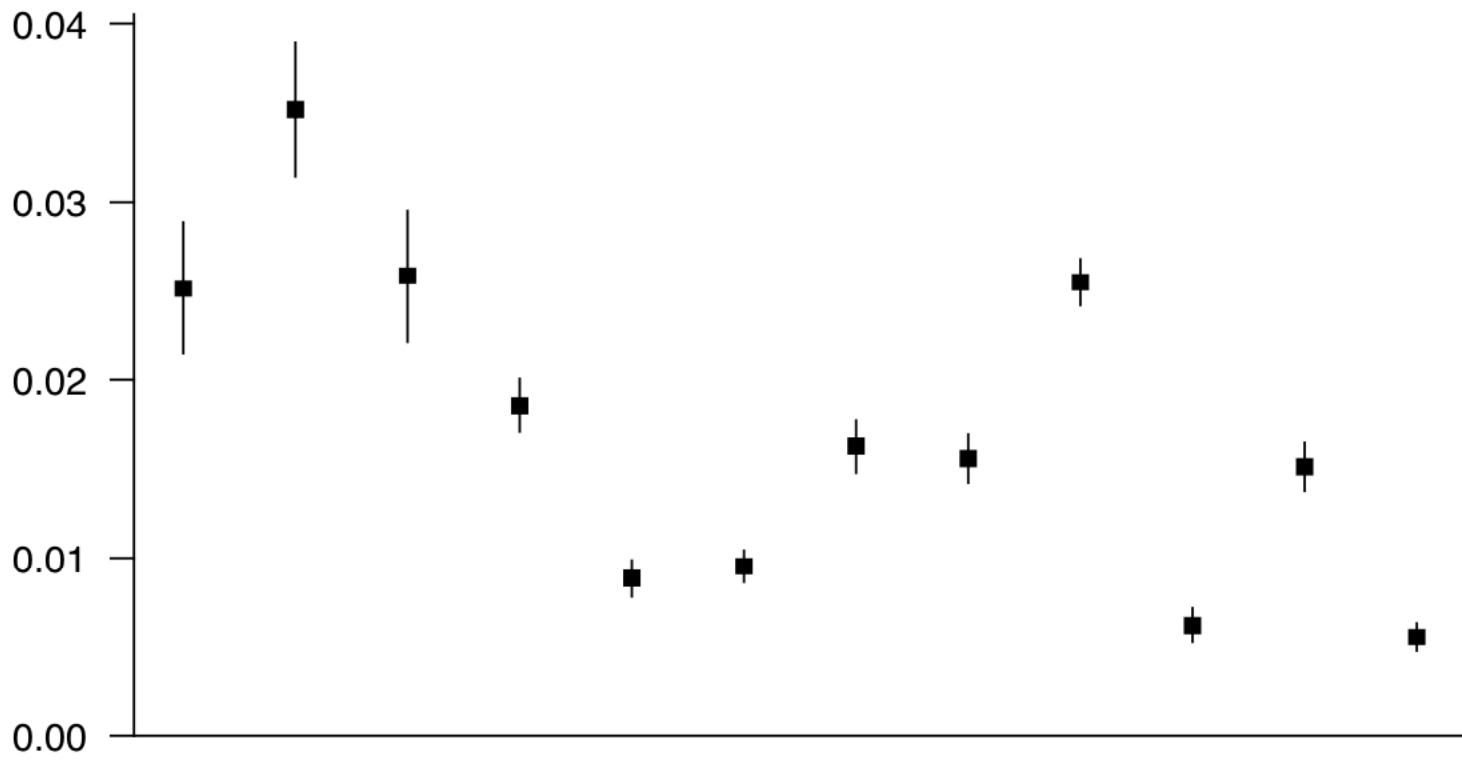

**B.****Shared history f4(YRI,Target; S1, S2)**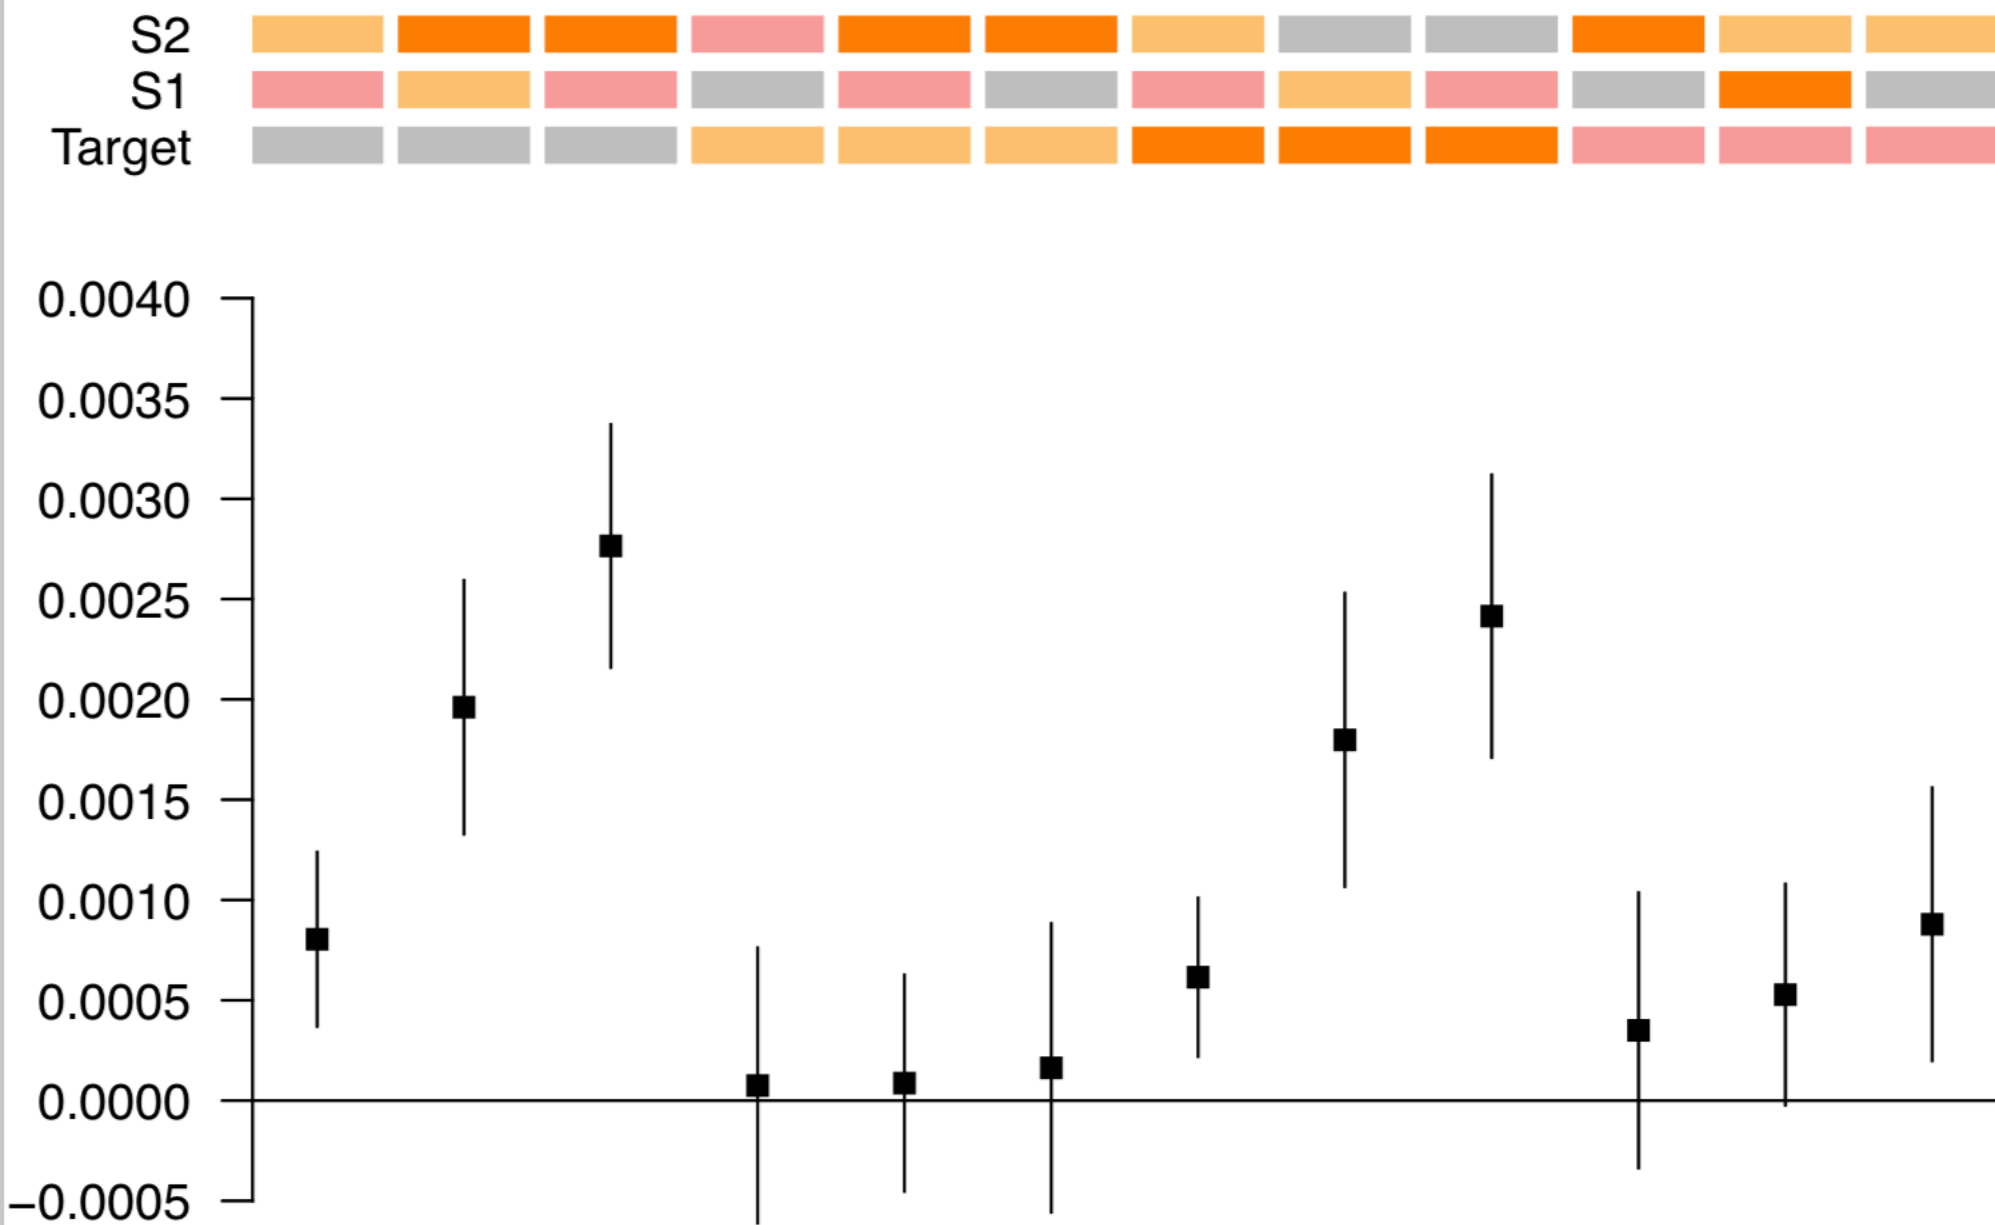

**C.****f3(YRI; CWA without Santiago, Ancient)**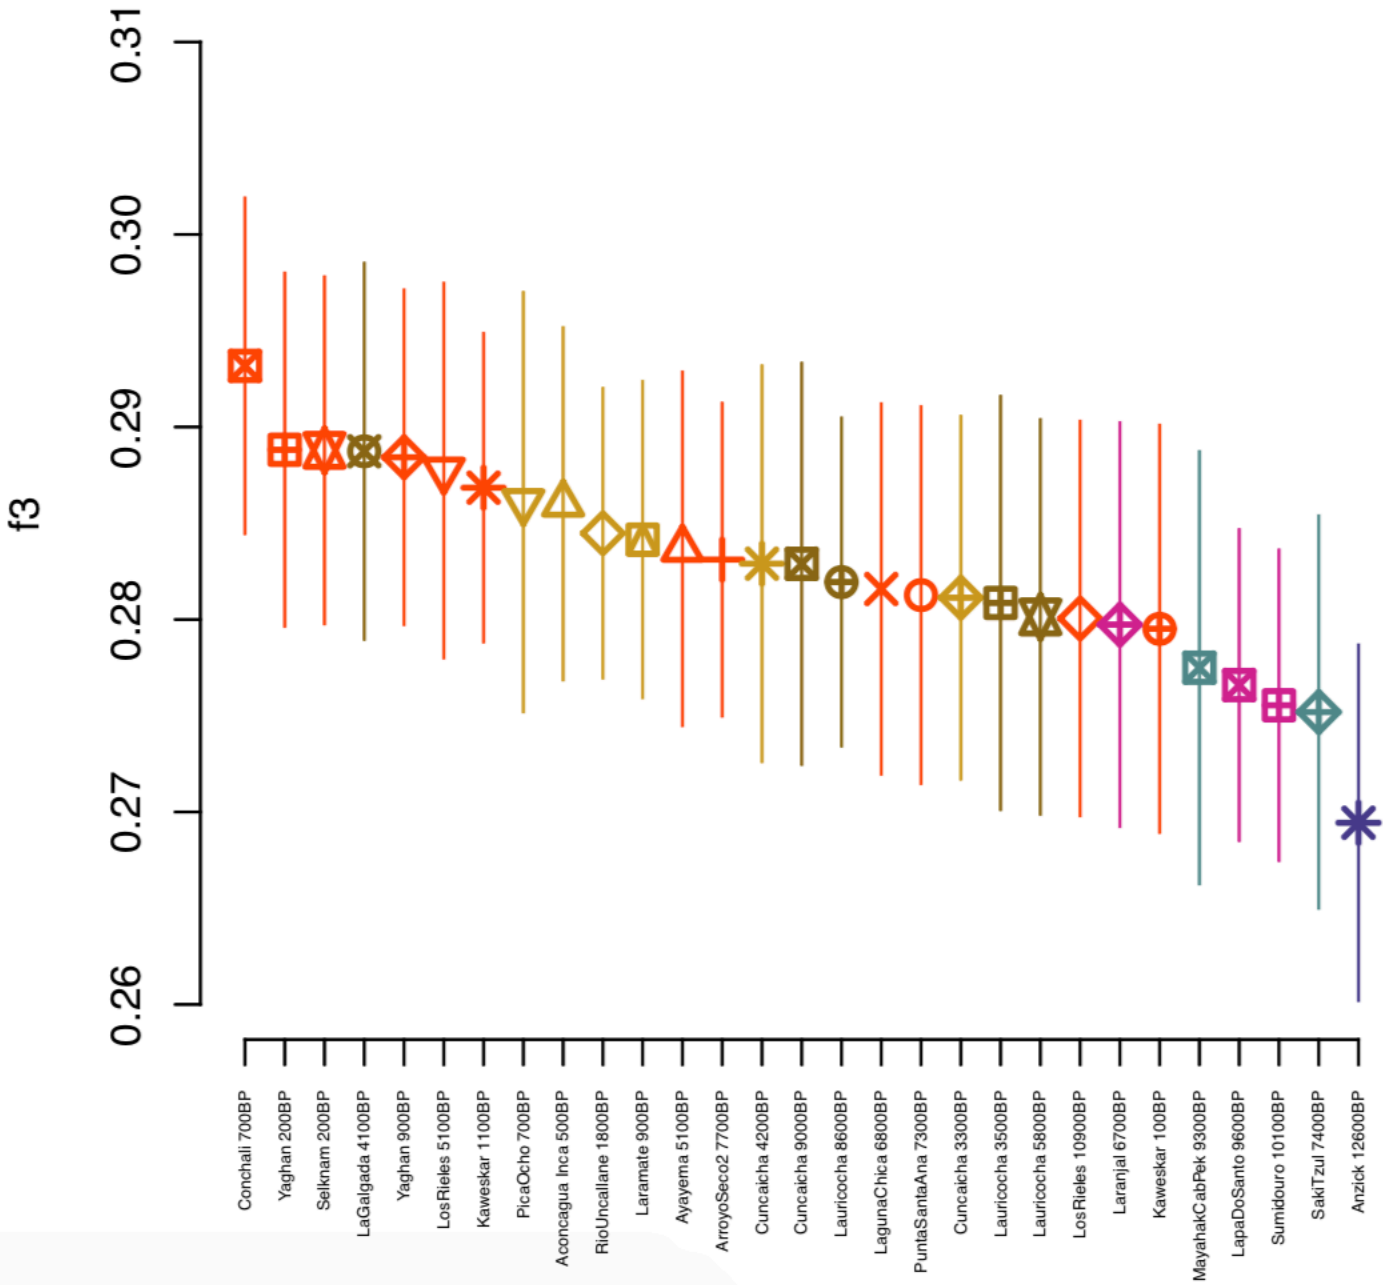

D.

## f4(YRI, CWA without Santiago; Ancient Beringia, Ancient)

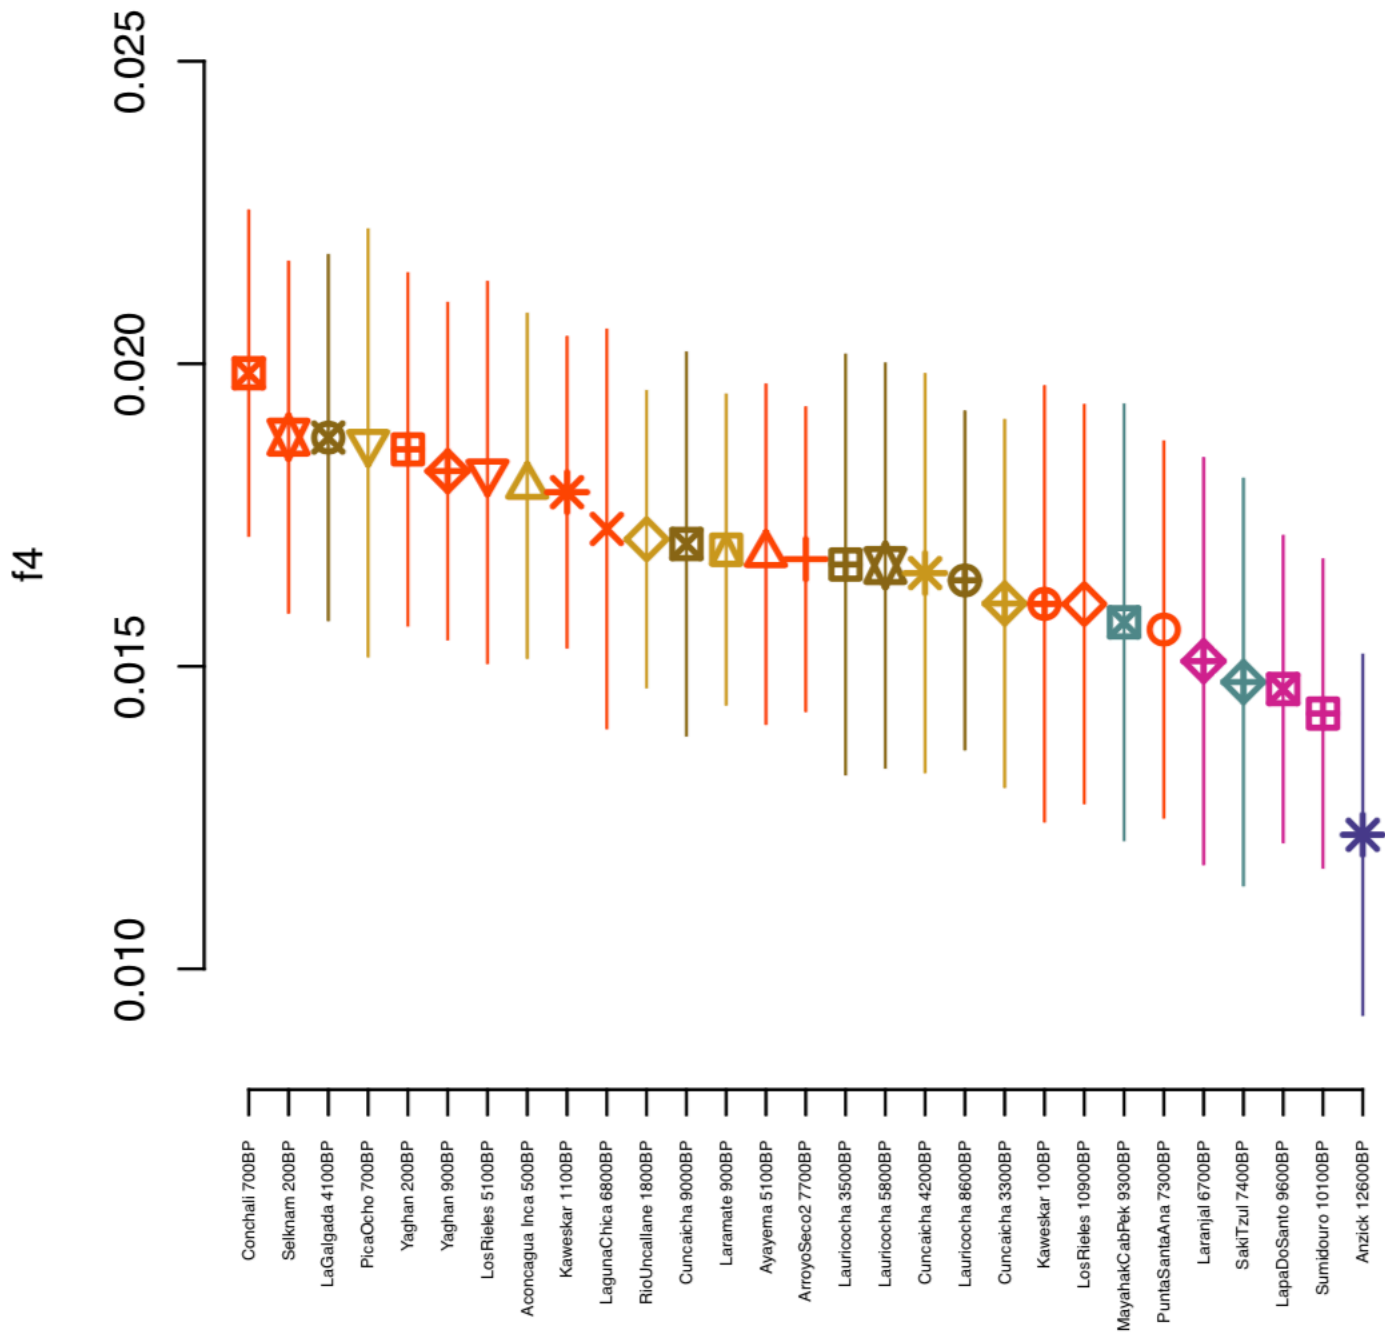

E.

f4(Ancient, CCP ; CWA without Santiago , YRI)

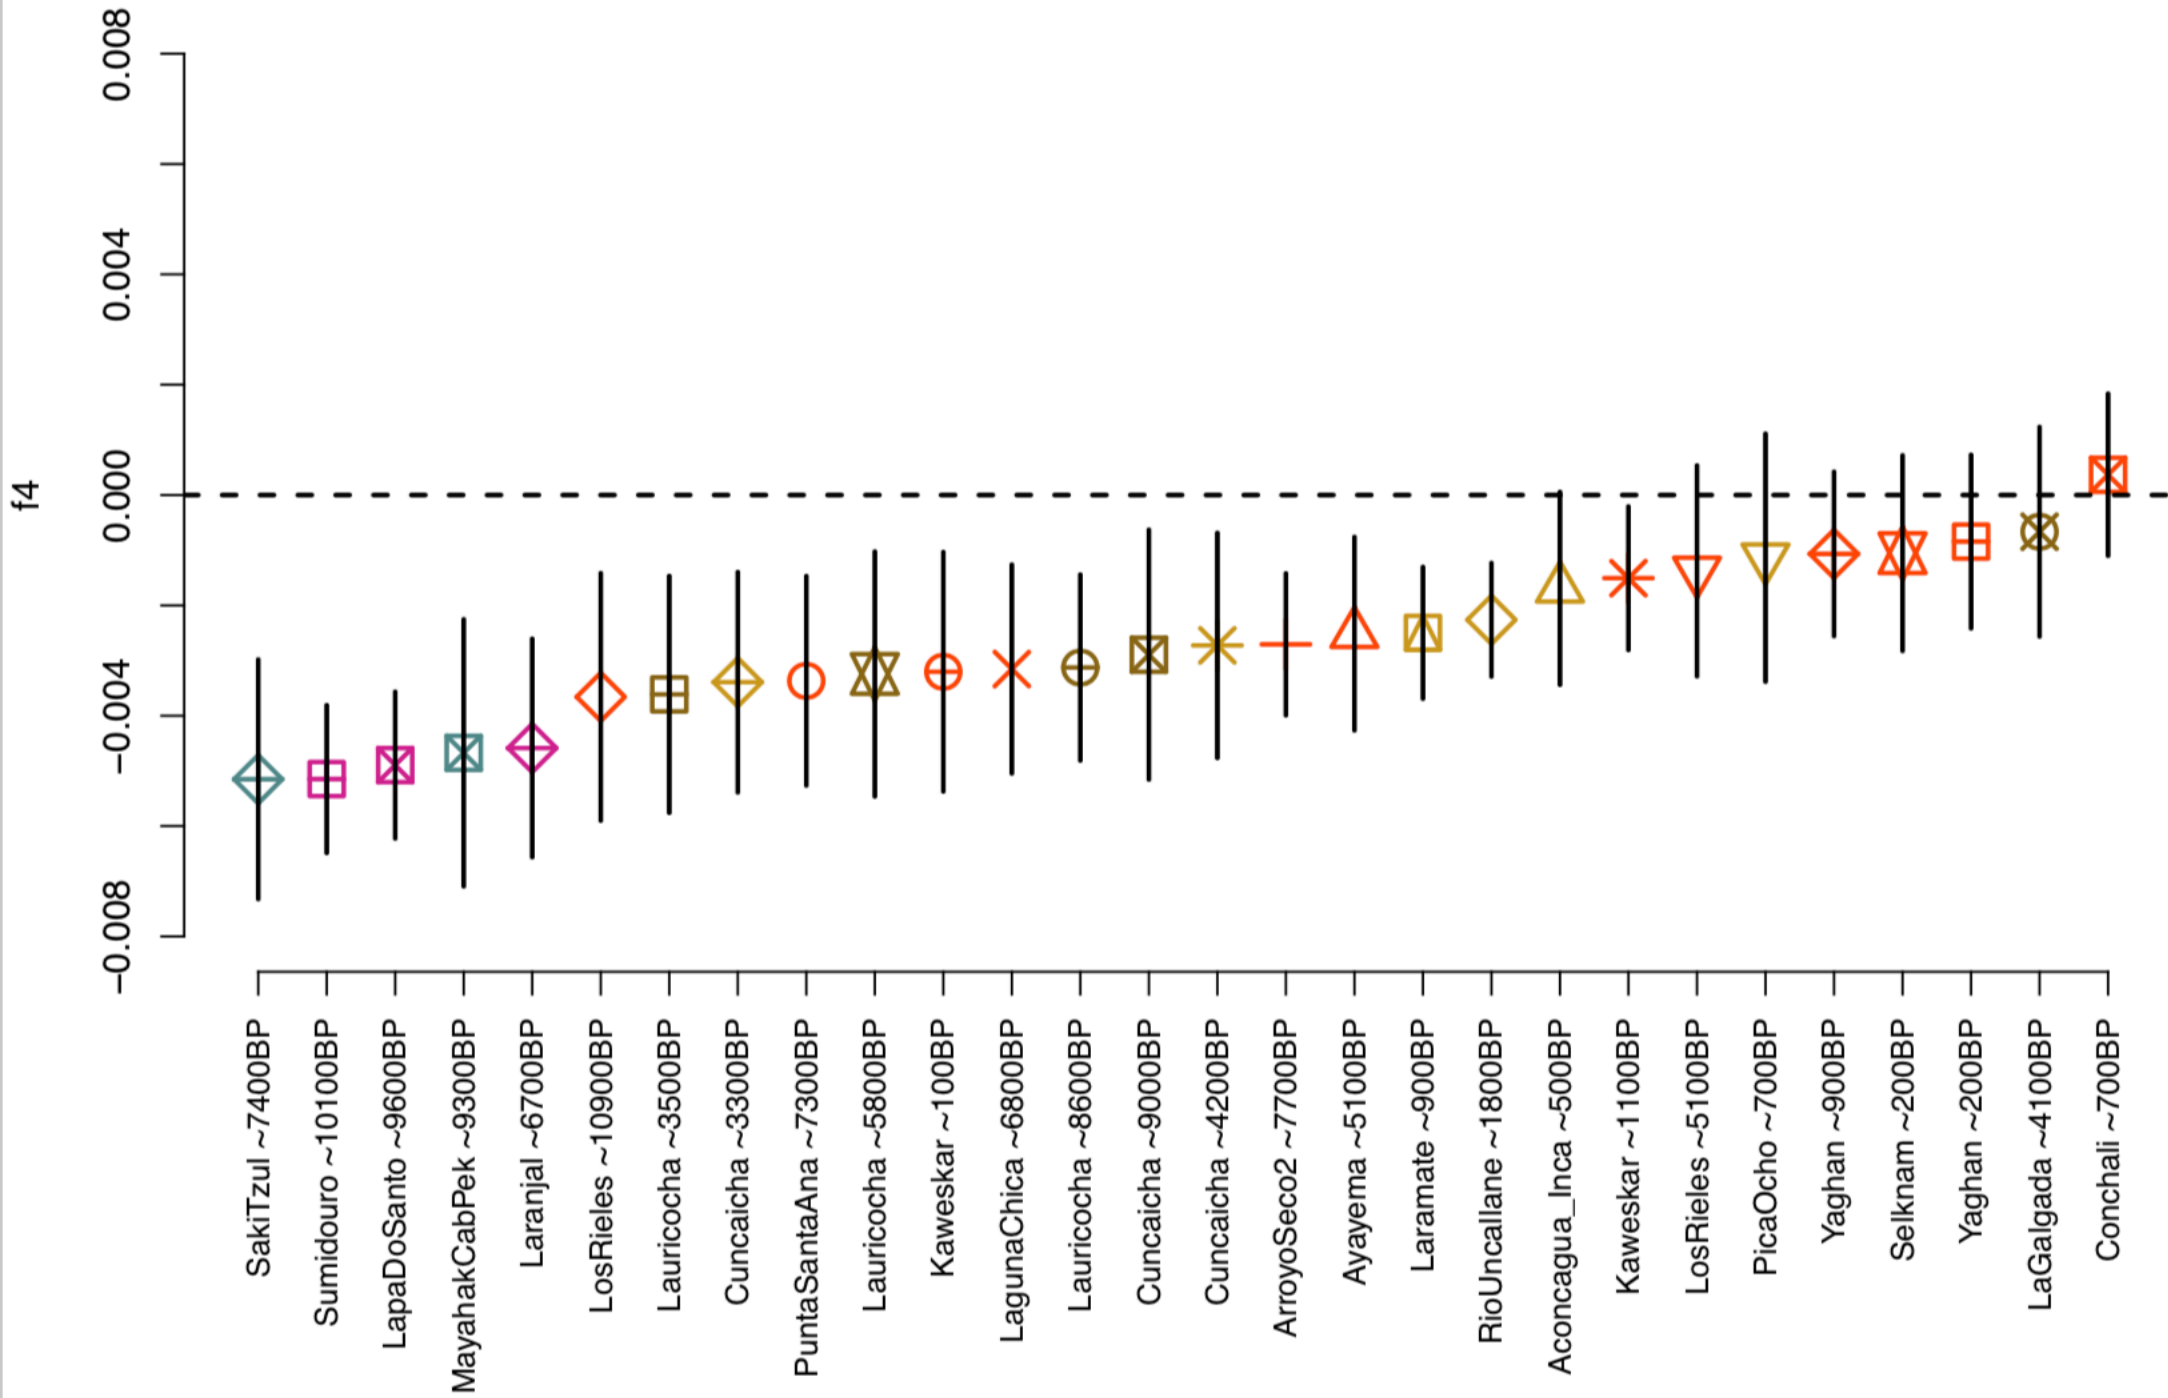

F.

f4(Ancient, CWA without Santiago ; CCP , YRI)

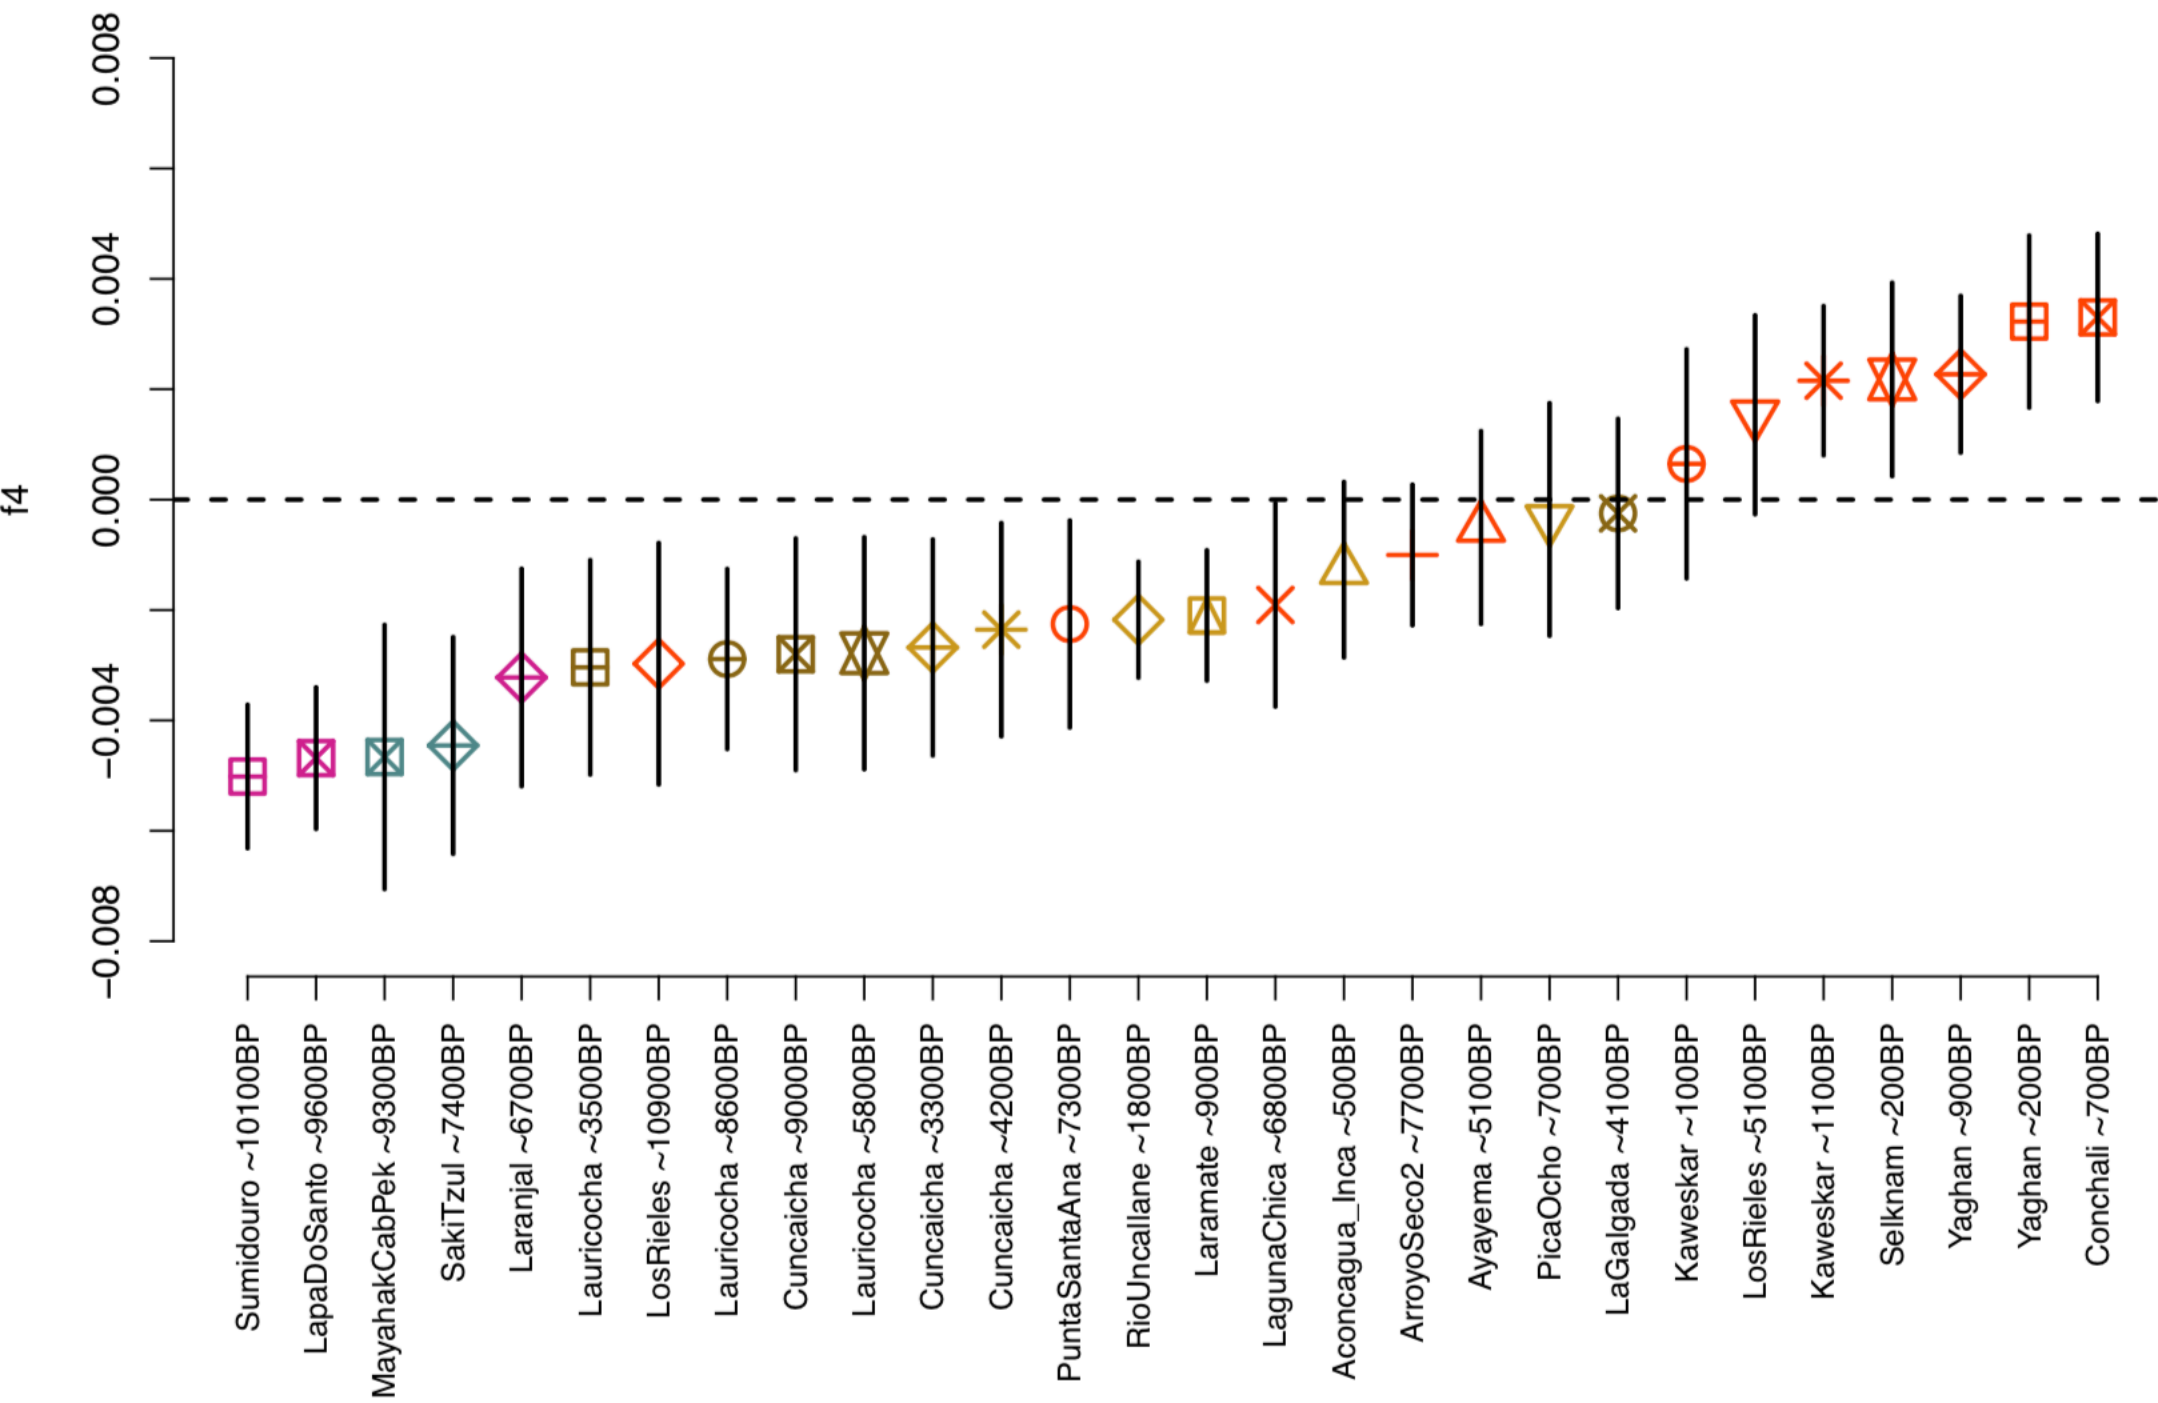

G.

## f4(YRI, Ancient; CWA without Santiago, CCP)

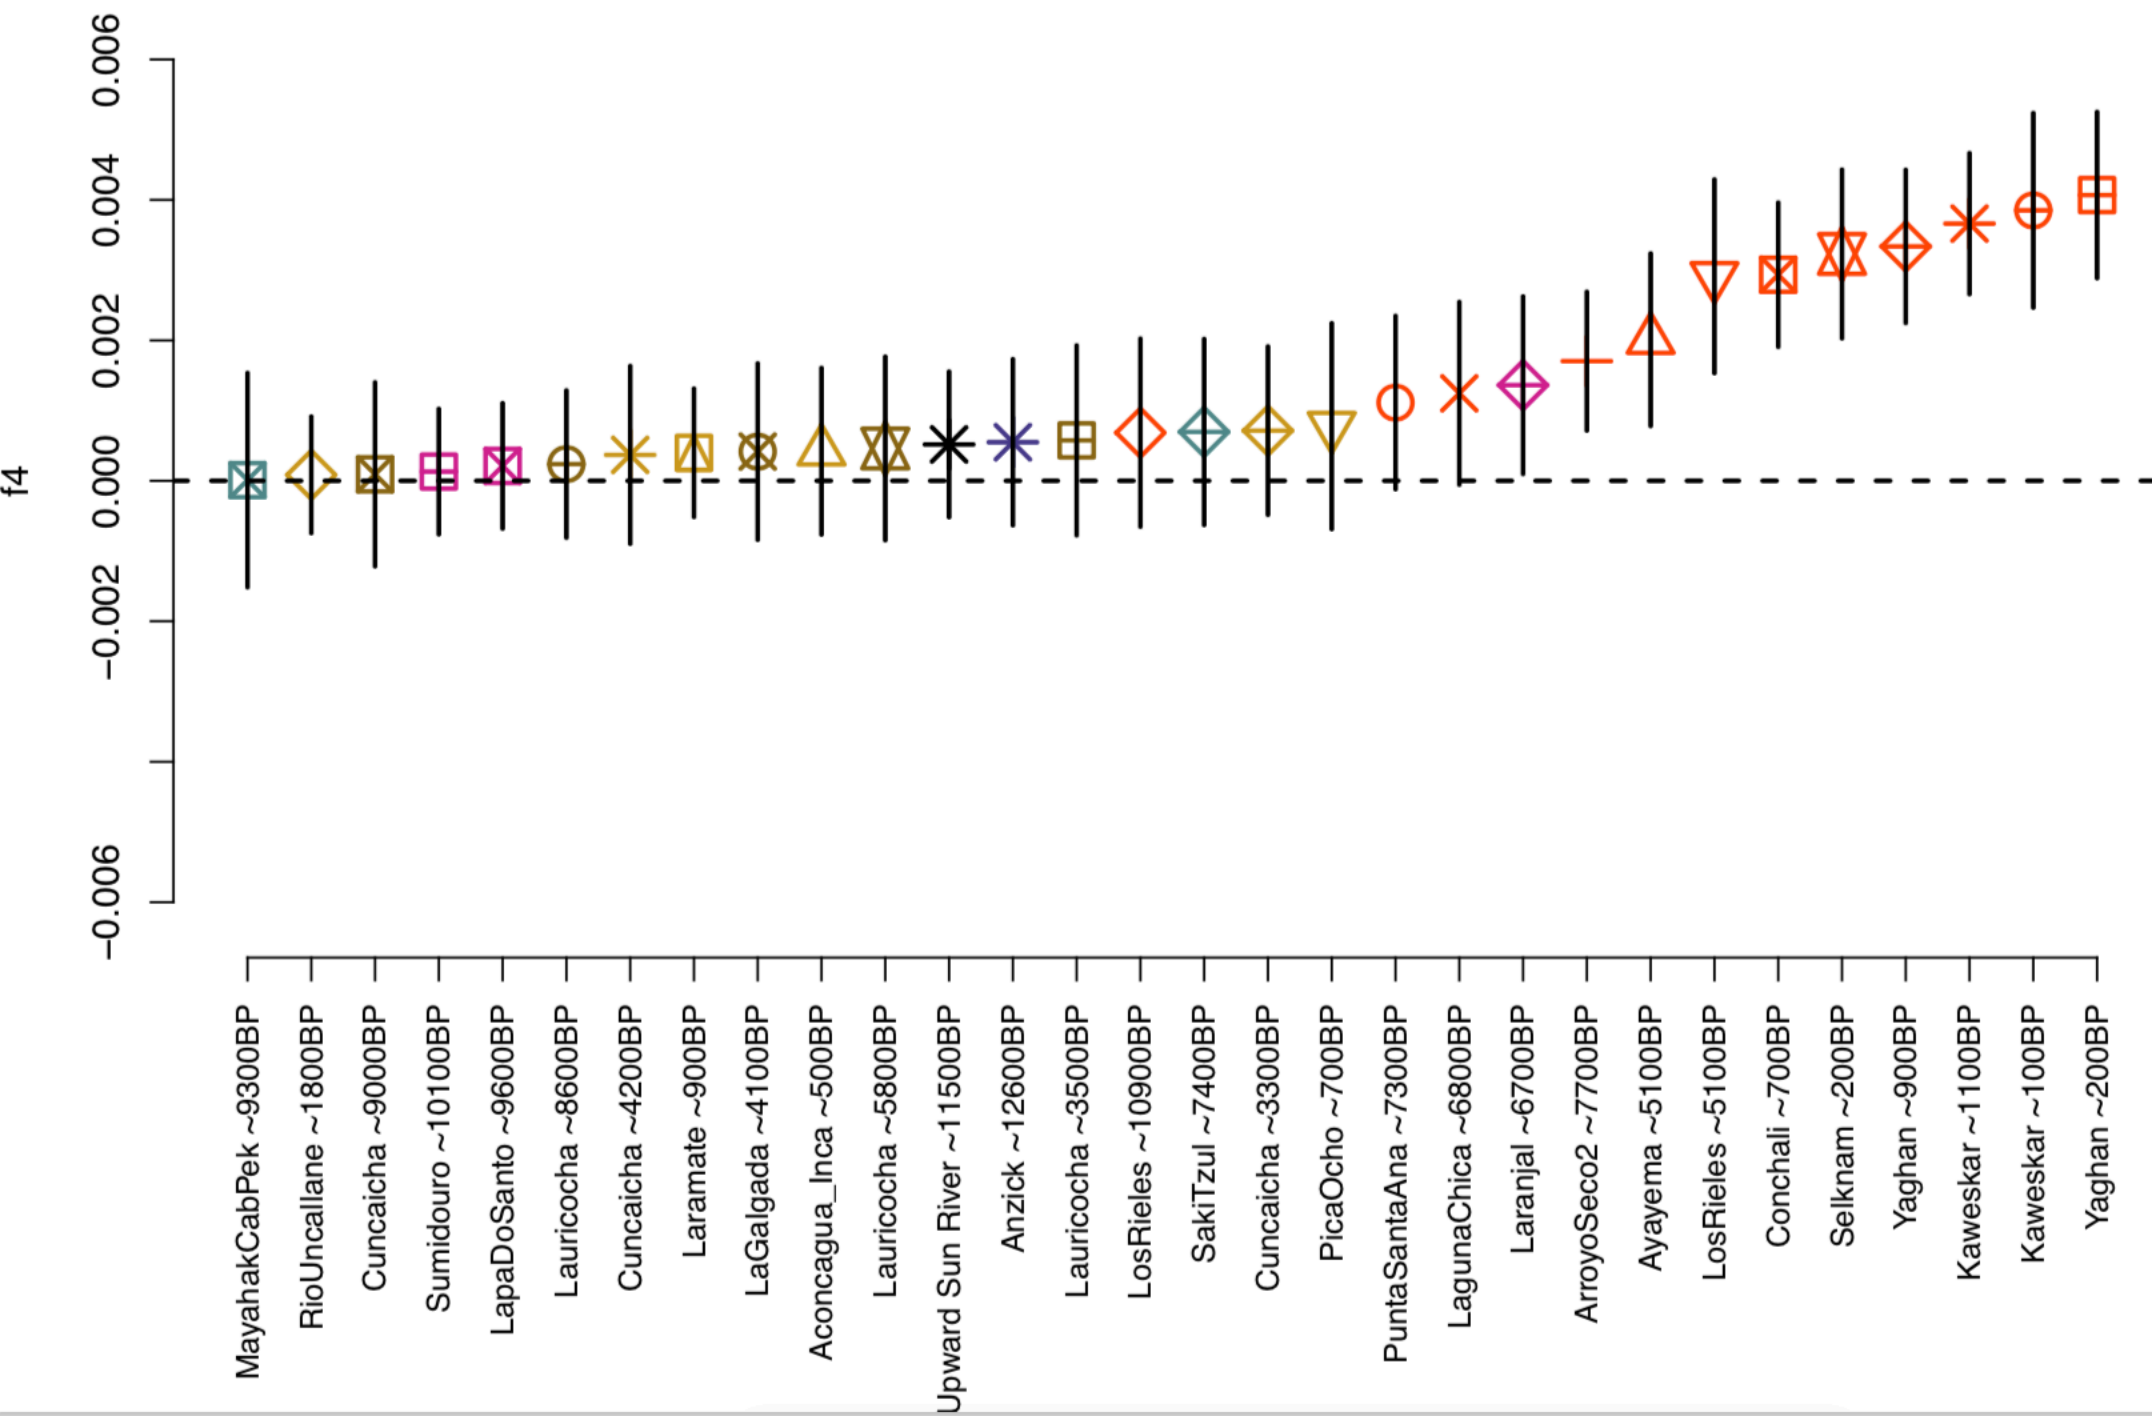

Supplement: pone.0233808.s023.pdf [file pone.0233808.s023.pdf]
