# Supplementary material for: Fine-scale genomic analyses of admixed individuals reveal unrecognized genetic ancestry components in Argentina
Source: PubMed Central journal article supplement (PMC7365470; doi:10.1371/journal.pone.0233808), 2020-07-16
Supplement: pone.0233808.s025.pdf [file pone.0233808.s025.pdf]

A.

### Cross-Validation Score Own study + de la Fuente et al. + 1KG

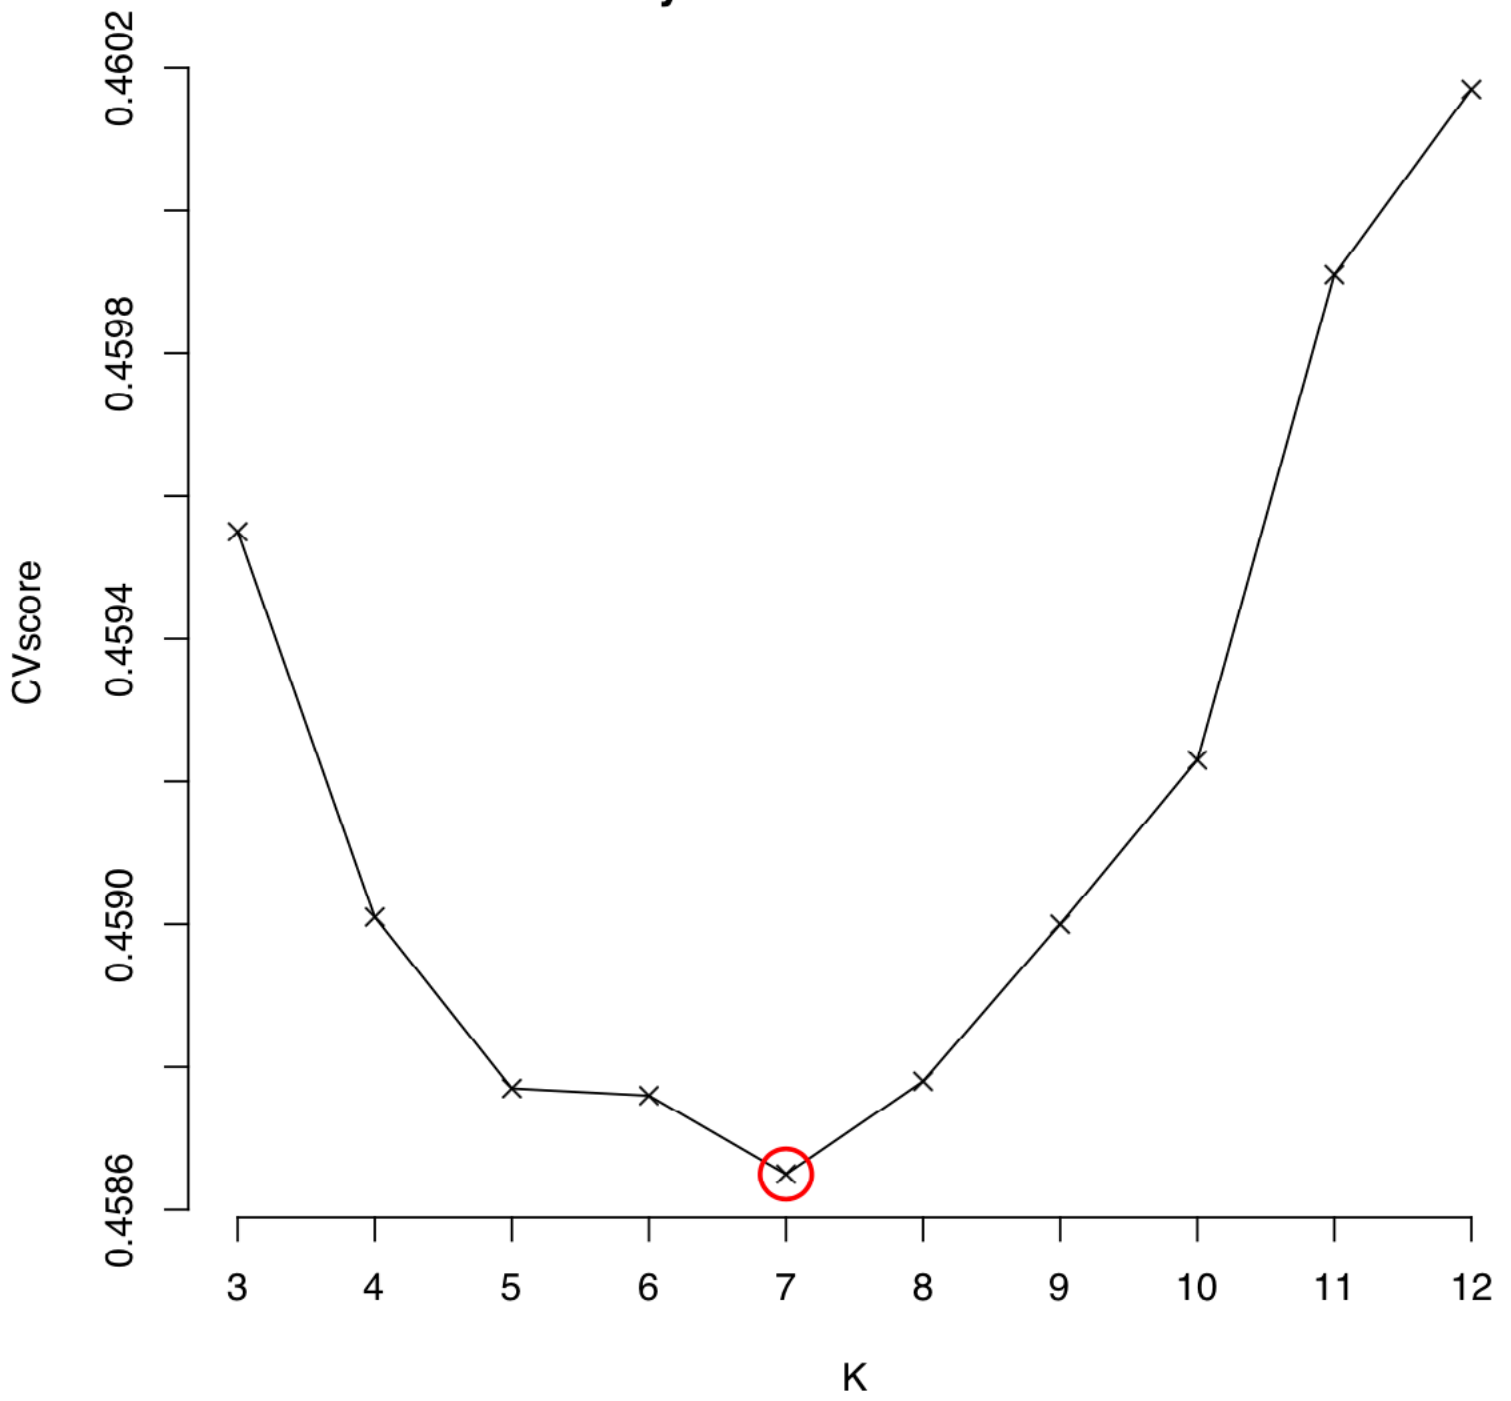

**B.**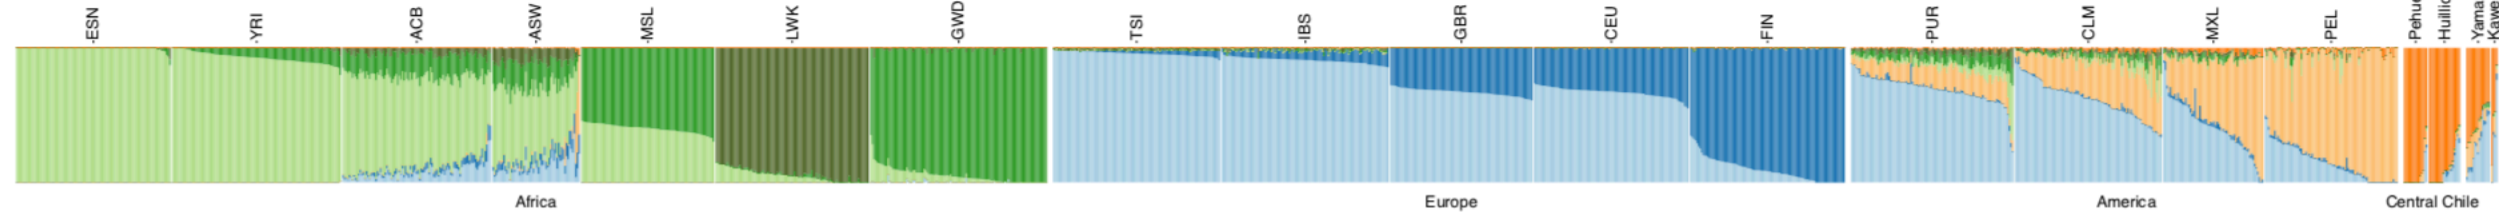 $K=7$ 1KGP +  
de la Fuente et al. 2018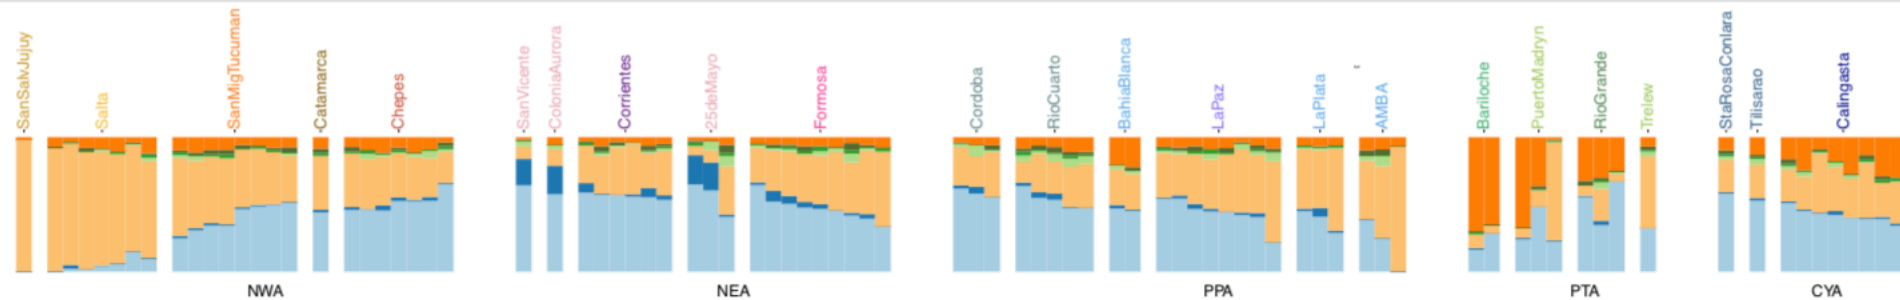

Present Study
