# Supplementary material for: Fine-scale genomic analyses of admixed individuals reveal unrecognized genetic ancestry components in Argentina
Source: PubMed Central journal article supplement (PMC7365470; doi:10.1371/journal.pone.0233808), 2020-07-16

**A.****Cross-Validation Score  
Homburger et al. + 1KG**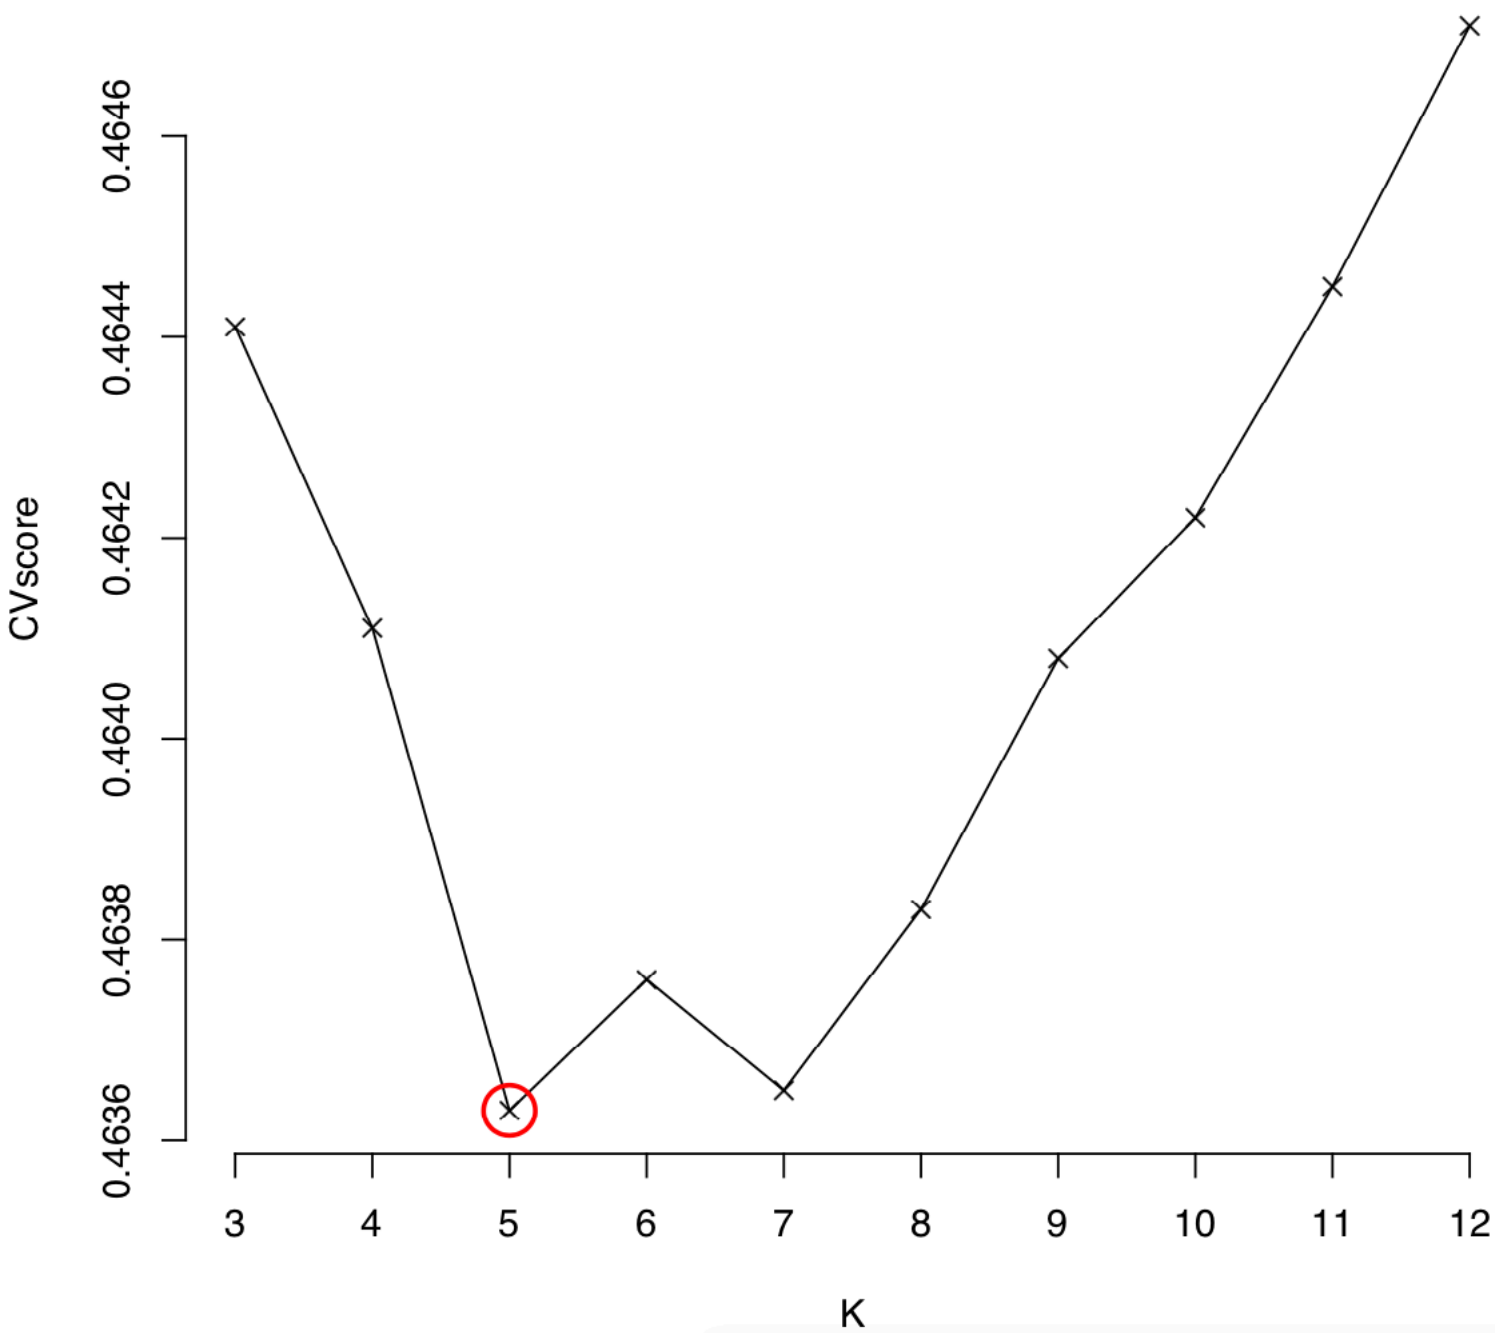

**B.** $K=5$ 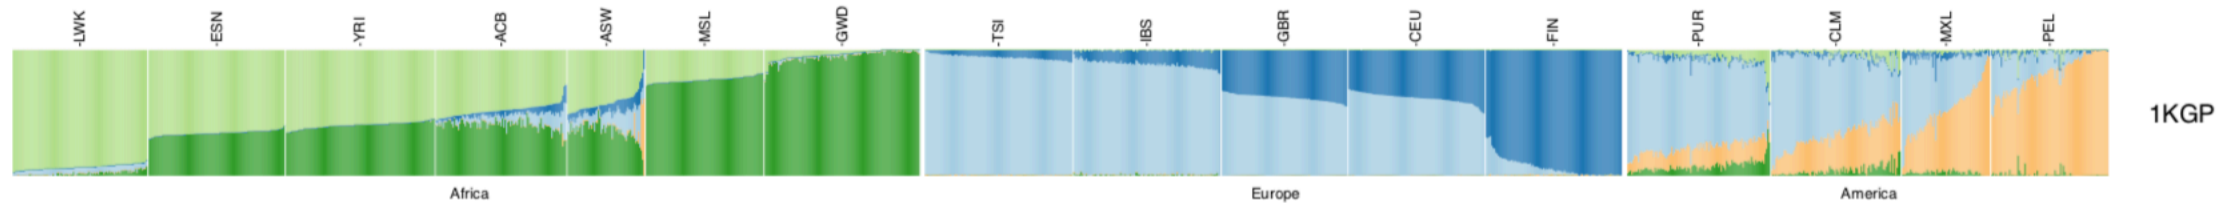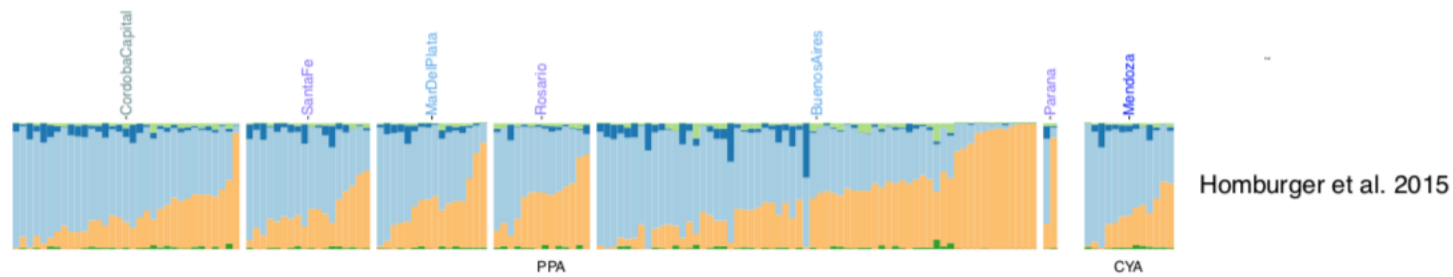

Supplement: pone.0233808.s026.pdf [file pone.0233808.s026.pdf]
