# Supplementary material for: Fine-scale genomic analyses of admixed individuals reveal unrecognized genetic ancestry components in Argentina
Source: PubMed Central journal article supplement (PMC7365470; doi:10.1371/journal.pone.0233808), 2020-07-16
Supplement: pone.0233808.s030.pdf [file pone.0233808.s030.pdf]

|                                            | <b>DS1</b>        | <b>DS2</b> | <b>DS2p</b>    | <b>DS3</b> | <b>DS3p</b>    | <b>DS4</b>        | <b>DS5</b>       | <b>DS6</b>               | <b>DS7</b>     |
|--------------------------------------------|-------------------|------------|----------------|------------|----------------|-------------------|------------------|--------------------------|----------------|
| <b>Analyses</b>                            | Worldwide Context | Phasing    | Local Ancestry | Phasing    | Local Ancestry | European Ancestry | African Ancestry | Native American Ancestry | <i>F-stats</i> |
| Present Study                              | ✓                 | ✓          | ✓              |            |                | ✓(a)              | ✓(a)             | ✓(a)                     | ✓(a)           |
| (Homburger et al. 2015)                    | ✓                 |            |                | ✓          | ✓              | ✓(a)              | ✓(a)             | ✓(a)                     | ✓(a)           |
| (de la Fuente et al. 2018)                 | ✓                 | ✓          | ✓              |            |                |                   |                  | ✓(a)                     | ✓(a)           |
| (Reich et al. 2012)                        | ✓                 |            |                |            |                |                   |                  | ✓                        | ✓(b)           |
| (The 1000 Genomes Project Consortium 2015) | ✓(c)              | ✓(d)       | ✓(d)           | ✓(d)       | ✓(d)           | ✓(e)              | ✓(f)             |                          | ✓(g)           |
| (Nelson et al. 2008)(h)                    |                   |            |                |            |                | ✓                 |                  |                          |                |
| (Pagani et al. 2012)                       |                   |            |                |            |                |                   | ✓(i)             |                          |                |
| (Schlebusch et al. 2012)                   |                   |            |                |            |                |                   | ✓(i)             |                          |                |
| (Patin et al. 2017) and references therein |                   |            |                |            |                |                   | ✓(i)             |                          |                |
| (Raghavan et al. 2015)                     |                   |            |                |            |                |                   |                  | ✓                        | ✓              |
| (Moreno-mayar et al. 2017)                 |                   |            |                |            |                |                   |                  | ✓                        | ✓              |
| (Moreno-mayar et al. 2018)                 |                   |            |                |            |                |                   |                  | ✓                        | ✓              |
| (Lindo et al. 2018)                        |                   |            |                |            |                |                   |                  | ✓                        | ✓              |
| (Posth et al. 2018)                        |                   |            |                |            |                |                   |                  | ✓                        | ✓              |
| # SNPs without LD-pruning                  | 64,531            | 608,501    | 608,501        | 694,626    | 694,626        | 29,347            | 137,136          | 47,003                   | 88,564         |
| # SNPs with LD-pruning                     | 59,237            | –          | –              | –          | –              | 27,634            | 128,086          | 39,423                   | –              |
| # Individuals                              | 2,076             | 1,645      | 1,645          | 1,772      | 1,772          | 1,612             | 1,742            | 505                      | 632            |

- a. Masked data for the specific ancestry analyzed
- b. Including individuals from Mixe population in Mexico
- c. Individuals from South America, Africa, Europe, and Afro-Americans
- d. Individuals from America, Africa and Europe
- e. Individuals from Africa
- f. Individuals from South America
- g. Only individuals from Yoruba population
- h. Only individuals identified in Novembre et al. 2008
- i. Removing individuals with less than 99% of African ancestry estimated through Admixture analyses ( $K=7$ )
